# Supplementary material for: Mucoromycotina Fungi Possess the Ability to Utilize Plant Sucrose as a Carbon Source: Evidence From Gongronella sp. w5
Source: Front Microbiol. 2021 Jan 13;11:591697. doi: 10.3389/fmicb.2020.591697 (PMC7874188; doi:10.3389/fmicb.2020.591697)
Supplement: Supplementary file 2 [file Data_Sheet_2.XLSX]

## Sheet: Appendix S2
Appendix S2: Differential accumulation of metabolites in M. truncatula roots after w5 inoculaotion
ID	FoldChange	Log2FoldChange	Formula	Names	KEGG CID	KEGG Pathways	Enzymes
DL-Norvaline	16.0259	4.00234
2-Methylbutyroylcarnitine	12.2523	3.61498
L-Carnitine	11.6487	3.54209	C7H15NO3	L-Carnitine;L-gamma-Trimethyl-beta-hydroxybutyrobetaine;Vitamin BT;3-Carboxy-2-hydroxy-N,N,N-trimethyl-1-propanaminium hydroxide, inner salt;Levocarnitine;(R)-Carnitine	C00318	map04976,Bile secretion
Acetylcarnitine	10.9304	3.45028	C9H18NO4	O-Acetylcarnitine;O-Acetyl-L-carnitine;acetylcarnitine	C02571
Myristic acid	5.42582	2.43984	C14H28O2	Tetradecanoic acid;Tetradecanoate;Myristic acid	C06424	map00061,Fatty acid biosynthesis	3.1.2.14
N-Acetyl-L-aspartic acid	4.21784	2.0765	C6H9NO5	N-Acetyl-L-aspartate;N-Acetyl-L-aspartic acid;N-acetylaspartate (NAA)	C01042	map00250,Alanine, aspartate and glutamate metabolism
13(S)-HOTrE	3.06445	1.61563	C18H30O3	13(S)-HOT;(9Z,11E,15Z)-(13S)-Hydroxyoctadeca-9,11,15-trienoate;(9Z,11E,15Z)-(13S)-13-Hydroxyoctadeca-9,11,15-trienoic acid;(9Z,11E,13S,15Z)-13-Hydroxyoctadeca-9,11,15-trienoic acid;13(S)-HOTrE	C16316	map00592,alpha-Linolenic acid metabolism
Sissotrin	2.85738	1.51469	C22H22O10	Biochanin A-beta-D-glucoside;Biochanin A 7-O-beta-D-glucoside;Sissotrin	C05376	map00943,Isoflavonoid biosynthesis
Maslinic Acid	2.80363	1.4873
Butein	2.78045	1.47532	C15H12O5	Butein	C08578	map00941,Flavonoid biosynthesis	5.5.1.6
Ononin	2.6641	1.41365	C22H22O9	Ononin;Formononetin 7-O-glucoside	C10509	map00943,Isoflavonoid biosynthesis
D-Galactarate	2.48187	1.31143	C6H10O8	D-Galactarate;D-Mucic acid;D-Galactaric acid;Galactaric acid;Galactarate;Mucic acid	C00879	map00053,Ascorbate and aldarate metabolism
Coumestrol	2.47335	1.30647	C15H8O5	Coumestrol	C10205	map00943,Isoflavonoid biosynthesis|map01061,Biosynthesis of phenylpropanoids|map01110,Biosynthesis of secondary metabolites
Homocitrate	2.46519	1.3017	C7H10O7	(R)-2-Hydroxybutane-1,2,4-tricarboxylate;Homocitrate;Homocitric acid;3-Hydroxy-3-carboxyadipic acid;(R)-2-Hydroxy-1,2,4-butanetricarboxylic acid	C01251	map00300,Lysine biosynthesis|map00620,Pyruvate metabolism|map01100,Metabolic pathways|map01120,Microbial metabolism in diverse environments|map01210,2-Oxocarboxylic acid metabolism|map01230,Biosynthesis of amino acids
L-Pipecolic acid	2.35959	1.23853
Salicylic acid	2.31943	1.21377	C7H6O3	Salicylate;o-Hydroxybenzoic acid;Salicylic acid;salicylate	C00805	map00360,Phenylalanine metabolism|map00621,Dioxin degradation|map00624,Polycyclic aromatic hydrocarbon degradation|map00626,Naphthalene degradation|map01053,Biosynthesis of siderophore group nonribosomal peptides|map01061,Biosynthesis of phenylpropanoids|map01070,Biosynthesis of plant hormones|map01100,Metabolic pathways|map01110,Biosynthesis of secondary metabolites|map01120,Microbial metabolism…
6''-O-Malonylglycitin	2.25408	1.17254
Glycitein	2.24939	1.16953	C16H12O5	Glycitein;7,4'-Dihydroxy-6-methoxyisoflavone	C14536	map00943,Isoflavonoid biosynthesis|map01110,Biosynthesis of secondary metabolites
myo-Inositol	2.10953	1.07692	C6H12O6	myo-Inositol;D-myo-Inositol;1D-myo-Inositol;L-myo-Inositol;1L-myo-Inositol;meso-Inositol;Inositol;Dambose;Cyclohexitol;Meat sugar;Bios I;myo-inositol	C00137	map00052,Galactose metabolism|map00053,Ascorbate and aldarate metabolism|map00521,Streptomycin biosynthesis|map00562,Inositol phosphate metabolism|map01100,Metabolic pathways|map01110,Biosynthesis of secondary metabolites|map01120,Microbial metabolism in diverse environments|map02010,ABC transporters|map04070,Phosphatidylinositol signaling system	1.13.99.1;2.4.1.82;2.4.1.123;2.7.1.64;2.7.8.11;3.1.3.25;3.2.1.22
(-)-Medicarpin	2.09706	1.06837	C16H14O4	Medicarpin;(-)-Medicarpin	C10503	map00943,Isoflavonoid biosynthesis|map01061,Biosynthesis of phenylpropanoids|map01110,Biosynthesis of secondary metabolites
Ribitol	2.07831	1.05541	C5H12O5	Ribitol;Adonitol;ribitol	C00474	map00040,Pentose and glucuronate interconversions|map00740,Riboflavin metabolism|map01100,Metabolic pathways
3,4-Dihydroxybenzoate (Protocatechuic acid)	2.04679	1.03336
Phloretin	2.04286	1.03059	C15H14O5	Phloretin	C00774
D-Tagatose	1.93689	0.95374	C6H12O6	D-Tagatose;lyxo-Hexulose	C00795	map00052,Galactose metabolism
4-Hydroxycinnamic acid	1.88589	0.915249	C9H8O3	4-Coumarate;p-Coumaric acid;trans-4-Hydroxycinnamate;trans-p-Hydroxycinnamate;4-Hydroxycinnamic acid;4-Hydroxycinnamate;4-hydroxycinnamate	C00811	map00130,Ubiquinone and other terpenoid-quinone biosynthesis|map00360,Phenylalanine metabolism|map00940,Phenylpropanoid biosynthesis|map01061,Biosynthesis of phenylpropanoids|map01100,Metabolic pathways|map01110,Biosynthesis of secondary metabolites|map01220,Degradation of aromatic compounds	1.14.13.11;4.3.1.25;6.2.1.12
Genistein	1.87741	0.908744	C21H20O10	Genistein 7-O-beta-D-glucoside;Genistein	C09126	map00943,Isoflavonoid biosynthesis
Sucrose	1.81358	0.858842	C12H22O11	Sucrose;Cane sugar;Saccharose;1-alpha-D-Glucopyranosyl-2-beta-D-fructofuranoside;sucrose	C00089	map00052,Galactose metabolism|map00500,Starch and sucrose metabolism|map01100,Metabolic pathways|map02010,ABC transporters|map02060,Phosphotransferase system (PTS)|map04742,Taste transduction|map04973,Carbohydrate digestion and absorption	2.4.1.13;2.4.1.82;3.1.3.24;3.2.1.20;3.2.1.22;3.2.1.26
Formononetin	1.78842	0.838682	C16H12O4	Formononetin	C00858	map00943,Isoflavonoid biosynthesis|map01061,Biosynthesis of phenylpropanoids|map01110,Biosynthesis of secondary metabolites
D-Mannose	1.76325	0.818236	C6H12O6	D-Mannose;Mannose;Seminose;Carubinose	C00159	map00051,Fructose and mannose metabolism|map00052,Galactose metabolism|map00520,Amino sugar and nucleotide sugar metabolism|map01100,Metabolic pathways|map02010,ABC transporters|map02060,Phosphotransferase system (PTS)|map04142,Lysosome	2.7.1.1;3.2.1.22;3.2.1.24;3.2.1.78;3.2.1.113;3.2.1.114
Galactinol	1.75309	0.809902	C12H22O11	alpha-D-Galactosyl-(1->3)-1D-myo-inositol;O-alpha-D-Galactosyl-(1->3)-1D-myo-inositol;3-O-alpha-D-Galactosyl-1D-myo-inositol;1-alpha-D-Galactosyl-myo-inositol;Galactinol;galactinol	C01235	map00052,Galactose metabolism	2.4.1.82;2.4.1.123;3.2.1.22
N-Acetyl-L-alanine	1.6839	0.751811	C5H9N2O2R	Ribosomal-protein N-acetyl-L-alanine	C04341
Trehalose	1.65995	0.731139	C12H22O11	alpha,alpha-Trehalose;alpha,alpha'-Trehalose;Trehalose;trehalose	C01083	map00500,Starch and sucrose metabolism|map01100,Metabolic pathways|map01110,Biosynthesis of secondary metabolites|map02010,ABC transporters|map02060,Phosphotransferase system (PTS)	3.1.3.12;3.2.1.28
sn-Glycerol 3-phosphoethanolamine	1.5917	0.670573
Aescin	1.55082	0.633034	C55H86O24	Aescin;Escin	C08921
Apigenin 7-glucoside	1.52332	0.607214
16-Hydroxypalmitic acid	1.47428	0.560011	C16H32O3	16-Hydroxypalmitate;16-Hydroxypalmitic acid	C18218	map00073,Cutin, suberine and wax biosynthesis|map01100,Metabolic pathways	2.3.1.188
2-Oxoadipic acid	1.44041	0.52648	C6H8O5	2-Oxoadipate;2-Oxoadipic acid;2-oxoadipate	C00322	map00300,Lysine biosynthesis|map00310,Lysine degradation|map00380,Tryptophan metabolism|map00680,Methane metabolism|map01100,Metabolic pathways|map01120,Microbial metabolism in diverse environments|map01210,2-Oxocarboxylic acid metabolism|map01230,Biosynthesis of amino acids	1.2.4.2;1.8.1.4;2.3.1.61
Acetyl-DL-Valine	1.3596	0.443182
S-Methyl-5'-thioadenosine	1.2217	0.288893	C11H15N5O3S	5'-Methylthioadenosine;Methylthioadenosine;S-Methyl-5'-thioadenosine;5-Methylthioadenosine;5'-Deoxy-5'-(methylthio)adenosine;Thiomethyladenosine;MTA;5-methylthioadenosine (MTA)	C00170	map00270,Cysteine and methionine metabolism|map00908,Zeatin biosynthesis|map01060,Biosynthesis of plant secondary metabolites|map01100,Metabolic pathways	2.5.1.16;2.5.1.43;2.5.1.79;2.5.1.108;3.2.2.16;4.4.1.14
2'-Deoxy-D-ribose	0.865763	-0.207956
3-Hydorxy-3-methylglutaric acid	0.797096	-0.327175	C6H10O5	3-Hydroxy-3-methylglutarate;3-Hydorxy-3-methylglutaric acid;beta-Hydroxy-beta-methylglutaric acid;Dicrotalic acid;3-Hydroxy-3-methylpentanedioic acid;Meglutol;3-hydroxy-3-methylglutarate	C03761
Mevalonic acid	0.791073	-0.338117	C6H12O4	(R)-Mevalonate;Mevalonic acid;3,5-Dihydroxy-3-methylvaleric acid	C00418	map00900,Terpenoid backbone biosynthesis|map01060,Biosynthesis of plant secondary metabolites|map01062,Biosynthesis of terpenoids and steroids|map01070,Biosynthesis of plant hormones|map01100,Metabolic pathways|map01110,Biosynthesis of secondary metabolites	1.1.1.34;2.7.1.36
D-gluconate	0.749048	-0.41687	C6H12O7	D-Gluconic acid;D-Gluconate;D-gluco-Hexonic acid;gluconate	C00257	map00030,Pentose phosphate pathway|map01100,Metabolic pathways|map01110,Biosynthesis of secondary metabolites|map01120,Microbial metabolism in diverse environments|map01200,Carbon metabolism	2.7.1.12
Adenosine	0.738709	-0.436921	C10H13N5O4	Adenosine;adenosine	C00212	map00230,Purine metabolism|map01100,Metabolic pathways|map04080,Neuroactive ligand-receptor interaction|map04270,Vascular smooth muscle contraction|map05012,Parkinson's disease|map05032,Morphine addiction|map05034,Alcoholism	2.7.1.20;3.1.3.5;3.3.1.1;3.5.4.4
Galactonic acid	0.715937	-0.482096	C6H12O7	L-Galactonate;L-Galactonic acid	C15930	map00040,Pentose and glucuronate interconversions|map00053,Ascorbate and aldarate metabolism|map01100,Metabolic pathways
(3-Carboxypropyl)trimethylammonium cation	0.699931	-0.514715
N-Benzyloxycarbonylglycine	0.662385	-0.594259	C10H11NO4	N-Benzyloxycarbonylglycine;N-CBZ-glycine	C03710
Pantetheine	0.653114	-0.614594	C11H22N2O4S	Pantetheine;(R)-Pantetheine	C00831	map00770,Pantothenate and CoA biosynthesis	2.7.1.33
L-Canavanine	0.647666	-0.626679	C5H12N4O3	Canavanine;L-Canavanine;2-Amino-4-(guanidinooxy)butyric acid	C00308
L-Asparagine	0.645506	-0.631497	C4H8N2O3	L-Asparagine;2-Aminosuccinamic acid;asparagine	C00152	map00250,Alanine, aspartate and glutamate metabolism|map00460,Cyanoamino acid metabolism|map00970,Aminoacyl-tRNA biosynthesis|map01060,Biosynthesis of plant secondary metabolites|map01100,Metabolic pathways|map01110,Biosynthesis of secondary metabolites|map01230,Biosynthesis of amino acids|map04974,Protein digestion and absorption|map04978,Mineral absorption	3.5.5.4;4.2.1.65;6.1.1.22;6.3.5.4
Maleamic acid	0.634227	-0.65693	C4H5NO3	Maleamate;Maleamic acid	C01596	map00760,Nicotinate and nicotinamide metabolism|map01120,Microbial metabolism in diverse environments
Dihydrouracil	0.618742	-0.69259	C4H6N2O2	5,6-Dihydrouracil;Dihydro-2,4(1H,3H)-pyrimidinedione;Dihydrouracile;Dihydrouracil;5,6-Dihydro-2,4-dihydroxypyrimidine;Hydrouracil;2,4-Dioxotetrahydropyrimidine	C00429	map00240,Pyrimidine metabolism|map00410,beta-Alanine metabolism|map00770,Pantothenate and CoA biosynthesis|map01100,Metabolic pathways	1.3.1.2;3.5.2.2
Alpha-D-Glucose	0.608903	-0.715715	C6H12O6	alpha-D-Glucose	C00267	map00010,Glycolysis / Gluconeogenesis|map00051,Fructose and mannose metabolism|map00052,Galactose metabolism|map00500,Starch and sucrose metabolism|map00520,Amino sugar and nucleotide sugar metabolism|map01060,Biosynthesis of plant secondary metabolites|map01061,Biosynthesis of phenylpropanoids|map01062,Biosynthesis of terpenoids and steroids|map01063,Biosynthesis of alkaloids derived from shikim…	2.7.1.1;3.2.1.20;3.2.1.21;3.2.1.23;3.2.1.26;5.1.3.3;5.3.1.5
Ampicillin	0.592768	-0.754461	C16H19N3O4S	Ampicillin;Anhydrous ampicillin	C06574
N-.alpha.-Acetyl-L-arginine	0.523705	-0.933175
D-Alanyl-D-alanine (D-Ala-D-Ala)	0.522307	-0.93703
Monomethyl glutaric acid	0.501761	-0.994928
4-Guanidinobutyric acid	0.489429	-1.03083	C5H11N3O2	4-Guanidinobutanoate;4-Guanidinobutyric acid;4-guanidinobutanoate	C01035	map00330,Arginine and proline metabolism|map01100,Metabolic pathways
N-Acetyl-L-glutamate	0.478188	-1.06435	C7H11NO5	N-Acetyl-L-glutamate;N-Acetyl-L-glutamic acid;N-acetylglutamate	C00624	map00330,Arginine and proline metabolism|map01100,Metabolic pathways|map01110,Biosynthesis of secondary metabolites|map01210,2-Oxocarboxylic acid metabolism|map01230,Biosynthesis of amino acids	2.3.1.1;2.3.1.35;2.7.2.8
D-Fructose	0.462657	-1.11199	C6H12O6	D-Fructose;Levulose;Fruit sugar;D-arabino-Hexulose;fructose	C00095	map00051,Fructose and mannose metabolism|map00052,Galactose metabolism|map00500,Starch and sucrose metabolism|map01100,Metabolic pathways|map02010,ABC transporters|map02060,Phosphotransferase system (PTS)|map04973,Carbohydrate digestion and absorption	1.1.1.14;2.4.1.13;2.7.1.1;2.7.1.4;3.2.1.20;3.2.1.26;5.3.1.5
Orotate	0.455006	-1.13604	C5H4N2O4	Orotate;Orotic acid;Uracil-6-carboxylic acid;orotate	C00295	map00240,Pyrimidine metabolism|map01100,Metabolic pathways	1.3.5.2;2.4.2.10
Apigenin	0.425339	-1.23332	C15H10O5	Apigenin;4',5,7-Trihydroxyflavone;5,7,4'-Trihydroxyflavone	C01477	map00941,Flavonoid biosynthesis|map00943,Isoflavonoid biosynthesis|map00944,Flavone and flavonol biosynthesis|map01061,Biosynthesis of phenylpropanoids|map01100,Metabolic pathways|map01110,Biosynthesis of secondary metabolites	1.14.13.21
L-Pyroglutamic acid	0.424584	-1.23588	C5H7NO3	Pidolic acid;5-Oxoproline;Pyroglutamic acid;5-Pyrrolidone-2-carboxylic acid;Pyroglutamate;5-Oxo-L-proline;L-Pyroglutamic acid;L-5-Pyrrolidone-2-carboxylic acid;5-oxoproline	C01879	map00480,Glutathione metabolism
Anthranilic acid (Vitamin L1)	0.418051	-1.25825
Dihydrothymine	0.391984	-1.35113	C5H8N2O2	5,6-Dihydrothymine;Dihydrothymine;5,6-Dihydro-5-methyluracil	C00906	map00240,Pyrimidine metabolism|map01100,Metabolic pathways	1.3.1.2;3.5.2.2
L-Glutamine	0.386946	-1.3698	C5H10N2O3	L-Glutamine;L-2-Aminoglutaramic acid;glutamine	C00064	map00230,Purine metabolism|map00240,Pyrimidine metabolism|map00250,Alanine, aspartate and glutamate metabolism|map00330,Arginine and proline metabolism|map00471,D-Glutamine and D-glutamate metabolism|map00630,Glyoxylate and dicarboxylate metabolism|map00910,Nitrogen metabolism|map00970,Aminoacyl-tRNA biosynthesis|map01060,Biosynthesis of plant secondary metabolites|map01100,Metabolic pathways|map…	1.4.1.13;1.4.1.14;1.4.7.1;2.4.2.14;2.6.1.16;2.6.1.85;4.1.3.27;4.3.3.6;6.1.1.18;6.3.1.2;6.3.4.2;6.3.5.1;6.3.5.2;6.3.5.3;6.3.5.4;6.3.5.5;6.3.5.6;6.3.5.7
Pelletierine	0.361922	-1.46625	C8H15NO	Pelletierine	C06182	map00960,Tropane, piperidine and pyridine alkaloid biosynthesis|map01064,Biosynthesis of alkaloids derived from ornithine, lysine and nicotinic acid|map01100,Metabolic pathways|map01110,Biosynthesis of secondary metabolites
N-Acetylglutamine	0.205642	-2.2818	C6H9N2O4R	N-Acyl-L-glutamine;N-acetylglutamine	C02716
Allantoate/Allantoic acid	0.157386	-2.66762
Allantoin	0.129363	-2.95051	C4H6N4O3	Allantoin;5-Ureidohydantoin;Glyoxyldiureide	C01551		3.5.2.5
Xanthine	0.0922517	-3.43828	C5H4N4O2	Xanthine;xanthine	C00385	map00230,Purine metabolism|map00232,Caffeine metabolism|map01060,Biosynthesis of plant secondary metabolites|map01065,Biosynthesis of alkaloids derived from histidine and purine|map01100,Metabolic pathways|map01110,Biosynthesis of secondary metabolites|map01120,Microbial metabolism in diverse environments	1.17.1.4;1.17.3.2
Hypoxanthine	0.0806604	-3.632	C5H4N4O	Hypoxanthine;Purine-6-ol	C00262	map00230,Purine metabolism|map01100,Metabolic pathways	1.17.1.4;1.17.3.2
