# Supplementary material for: Mucoromycotina Fungi Possess the Ability to Utilize Plant Sucrose as a Carbon Source: Evidence From Gongronella sp. w5
Source: Front Microbiol. 2021 Jan 13;11:591697. doi: 10.3389/fmicb.2020.591697 (PMC7874188; doi:10.3389/fmicb.2020.591697)
Supplement: Supplementary file 3 [file Data_Sheet_3.XLSX]

## Sheet: Sheet1
Appendix S3: Differentially expressed genes in M. truncatula roots after w5 inoculaotion
id	baseMean	baseMeanA	baseMeanB	foldChange	log2FoldChange	pval	padj	Chromosome	Start Site	End Site	Direction	Length	Name	GO	KEGG	EC	NCBI_GI	Description
Medtr3g095540	121.598	200.011	43.1854	0.215916	-2.21146	1.31447e-10	8.33935e-07	3	43652898	43654137	-	929	Medtr3g095540	GO:0009522;GO:0009522;GO:0009535;GO:0015979;GO:0015979;GO:0016491;GO:0019344;GO:0035304;GO:0055114;	K02701	-	11431141	photosystem I reaction center subunit N
Medtr8g096920	13.8194	27.6387	0	0	-Inf	1.63387e-09	6.90002e-06	8	40681554	40682449	-	896	Medtr8g096920	-	-	-	25502023	pathogenesis-related thaumatin family protein
Medtr1588s0010	279.669	429.718	129.62	0.301639	-1.72911	2.1752e-09	6.90002e-06	scaffold1588	1218	1520	+	303	Medtr1588s0010	GO:0015986;GO:0015986;GO:0045261;GO:0045261;GO:0046933;GO:0046933;GO:0099132;	-	-	25481739	ATP synthase F1, gamma subunit
Medtr1g034260	109.797	188.469	31.1256	0.16515	-2.59816	4.26915e-09	1.20376e-05	1	12453692	12454578	+	887	Medtr1g034260	GO:0009512;GO:0009512;GO:0016020;GO:0016021;GO:0016021;	-	-	25482675	cytochrome b6f complex subunit (PetM), putative
Medtr5g006130	803.412	1165.09	441.732	0.379139	-1.3992	2.7288e-08	6.29533e-05	5	782712	783685	+	974	Medtr5g006130	GO:0009522;GO:0009522;GO:0009538;GO:0009538;GO:0015979;GO:0015979;	K02692	-	11438662	photosystem I reaction center subunit II
Medtr1g084050	82.3653	131.444	33.2868	0.25324	-1.98142	8.0667e-08	0.00012123	1	37484310	37485662	+	1353	Medtr1g084050	GO:0016740;GO:0030410;GO:0030410;GO:0030410;GO:0030418;GO:0030418;	K05953	[EC:2.5.1.43]	11405947	nicotianamine synthase-like protein
Medtr5g082130	58.9305	98.4853	19.3758	0.196738	-2.34566	1.05884e-07	0.000149278	5	35257495	35259864	-	1570	Medtr5g082130	GO:0005515;	-	-	11413741	hypothetical protein
Medtr1g082420	122.989	191.885	54.0925	0.281901	-1.82674	1.24766e-07	0.000158842	1	36640029	36642434	-	1214	Medtr1g082420	GO:0003993;GO:0003993;GO:0006636;GO:0009507;GO:0009534;GO:0009535;GO:0009535;GO:0009579;GO:0009637;GO:0009657;GO:0010114;GO:0010206;GO:0010206;GO:0010218;GO:0016020;GO:0016021;GO:0016021;GO:0016311;GO:0016787;GO:0019344;GO:0019761;GO:0031977;GO:0031977;GO:0035304;	-	-	11405923	thylakoid lumen 18.3 kDa protein
Medtr7g023290	182.673	285.949	79.3977	0.277664	-1.84859	1.25186e-07	0.000158842	7	7621406	7626267	-	1006	Medtr7g023290	GO:0005509;GO:0005509;GO:0009507;GO:0009523;GO:0009523;GO:0009579;GO:0009654;GO:0009654;GO:0015979;GO:0015979;GO:0019898;GO:0019898;GO:0031977;GO:0005509;GO:0005509;GO:0009523;GO:0009523;GO:0009654;GO:0009654;GO:0015979;GO:0015979;GO:0019898;GO:0019898;	K02717	-	25497707	oxygen-evolving complex/thylakoid lumenal 25.6 kDa protein
Medtr2g092930	1231.07	1743.91	718.223	0.411847	-1.27982	2.35991e-07	0.000285178	2	39535830	39541285	-	3358	Medtr2g092930	GO:0003824;GO:0003824;GO:0006099;GO:0006099;GO:0008964;GO:0008964;GO:0008964;GO:0015977;GO:0015977;GO:0016829;	K01595	[EC:4.1.1.31]	11413239	phosphoenolpyruvate carboxylase
Medtr1g026125	158.387	236.252	80.5218	0.340831	-1.55287	4.4848e-07	0.000488781	1	8437558	8438652	-	1095	Medtr1g026125	GO:0005623;GO:0005623;GO:0006662;GO:0006662;GO:0015035;GO:0015035;GO:0045454;GO:0045454;GO:0055114;	-	-	25482213	CDSP32 protein (drought-induced stress protein of 32 kDa)
Medtr7g079900	505.048	759.813	250.284	0.329402	-1.60208	4.62258e-07	0.000488781	7	30356399	30357636	-	939	Medtr7g079900	GO:0009522;GO:0009522;GO:0009535;GO:0009538;GO:0009538;GO:0009657;GO:0009941;GO:0010287;GO:0015979;GO:0015979;GO:0016020;GO:0016021;GO:0016021;GO:0016491;GO:0030003;GO:0055114;GO:0070838;	K02699	-	11408159	photosystem I reaction center subunit XI
Medtr2g022460	58.7403	94.3204	23.1601	0.245548	-2.02593	7.70044e-07	0.000680685	2	7755881	7757715	+	1835	Medtr2g022460	GO:0004190;GO:0004190;GO:0006508;GO:0006508;GO:0006508;GO:0008152;GO:0008233;GO:0016787;GO:0016798;GO:0045493;	-	-	25486102	eukaryotic aspartyl protease family protein
Medtr5g064610	131.576	196.972	66.1793	0.335982	-1.57354	7.77865e-07	0.000680685	5	27142161	27146560	-	1500	Medtr5g064610	GO:0004601;GO:0004601;GO:0004601;GO:0006979;GO:0006979;GO:0009535;GO:0009543;GO:0009637;GO:0010103;GO:0010114;GO:0010218;GO:0016491;GO:0016688;GO:0019252;GO:0019760;GO:0020037;GO:0020037;GO:0055114;GO:0055114;GO:0055114;GO:0098869;	K00434	[EC:1.11.1.11]	11437370	thylakoid lumenal 29 kDa protein
Medtr1g069465	215.843	338.131	93.5548	0.276682	-1.8537	8.98118e-07	0.000759718	1	30081689	30083495	-	1071	Medtr1g069465	GO:0009507;GO:0009523;GO:0009523;GO:0009523;GO:0009535;GO:0009535;GO:0009570;GO:0009570;GO:0009579;GO:0009654;GO:0009654;GO:0015979;GO:0015979;GO:0015979;GO:0016020;GO:0016020;	K08903	-	25484200	photosystem II reaction center Psb28 protein
Medtr8g078870	4800.68	7146.28	2455.08	0.343547	-1.54142	1.01964e-06	0.000808603	8	33605619	33607858	-	1469	Medtr8g078870	GO:0009279;GO:0009654;GO:0009654;GO:0010207;GO:0010207;GO:0010242;GO:0010242;GO:0042549;GO:0042549;GO:0055114;	K02716	-	25501656	photosystem II oxygen-evolving enhancer protein
Medtr4g075040	309.589	450.379	168.798	0.374791	-1.41584	3.06448e-06	0.00199404	4	28614207	28620841	+	2409	Medtr4g075040	GO:0005515;GO:0009533;GO:0009535;GO:0009637;GO:0009941;GO:0010027;GO:0010114;GO:0010218;GO:0010304;GO:0031977;GO:0035304;GO:0042744;GO:0042793;	-	-	11439200	photosystem II stability/assembly factor HCF136
Medtr6g007607	208.303	308.787	107.818	0.349168	-1.51801	4.45191e-06	0.00268991	6	1668576	1672333	-	1647	Medtr6g007607	GO:0000413;GO:0000413;GO:0003755;GO:0003755;GO:0016853;	-	-	25495180	peptidyl-prolyl cis-trans isomerase
Medtr3g449930	3692.9	5254.69	2131.12	0.405565	-1.302	5.8147e-06	0.0032791	3	17103225	17105971	+	1168	Medtr3g449930	GO:0005509;GO:0005509;GO:0009523;GO:0009523;GO:0009654;GO:0009654;GO:0015979;GO:0015979;GO:0019898;GO:0019898;GO:0005509;GO:0005509;GO:0009523;GO:0009523;GO:0009654;GO:0009654;GO:0015979;GO:0015979;GO:0019898;GO:0019898;	K02717	-	25490561	oxygen-evolving enhancer protein 2-1
Medtr1g083580	68.8983	105.927	31.8692	0.30086	-1.73284	6.36929e-06	0.00351377	1	37186022	37190922	-	1398	Medtr1g083580	GO:0005515;	-	-	11410771	F-box protein
Medtr5g008750	189.057	271.433	106.68	0.393026	-1.3473	7.831e-06	0.00405566	5	1912089	1914573	+	1338	Medtr5g008750	GO:0008942;GO:0008942;GO:0009507;GO:0009534;GO:0009535;GO:0009535;GO:0009941;GO:0009941;GO:0010207;GO:0016491;GO:0016491;GO:0042128;GO:0042549;GO:0051537;GO:0051537;GO:0055114;GO:0055114;	-	-	11442362	Rieske (2Fe-2S) domain protein
Medtr2g089795	408.491	622.799	194.182	0.311789	-1.68136	8.31447e-06	0.00421993	2	37974978	37978293	-	1416	Medtr2g089795	GO:0010027;GO:0010207;GO:0010207;GO:0015979;GO:0015979;	-	-	25487573	photosystem II biogenesis protein
Medtr7g111860	542.521	823.626	261.417	0.317397	-1.65564	8.67408e-06	0.00431612	7	45952399	45955304	-	1362	Medtr7g111860	GO:0003824;GO:0003824;GO:0050662;GO:0050662;	-	-	25499634	stem-loop-binding protein of 41 kDa protein B
Medtr7g116630	155.803	224.013	87.5922	0.391014	-1.35471	9.23561e-06	0.00448965	7	48156166	48159928	-	1939	Medtr7g116630	GO:0000096;GO:0006636;GO:0006655;GO:0006766;GO:0009106;GO:0009108;GO:0009507;GO:0009507;GO:0009535;GO:0009695;GO:0009965;GO:0010028;GO:0016491;GO:0019216;GO:0019748;GO:0031408;GO:0031977;GO:0044272;GO:0046422;GO:0046422;GO:0055114;GO:0055114;GO:0055114;GO:0009507;GO:0009507;GO:0046422;GO:0046422;GO:0055114;GO:0055114;	K09839	[EC:1.23.5.1]	11429816	violaxanthin de-epoxidase
Medtr3g115920	3267.55	4657.01	1878.09	0.403282	-1.31014	1.10048e-05	0.00517163	3	54180220	54184182	-	2698	Medtr3g115920	GO:0000166;GO:0004365;GO:0006006;GO:0006006;GO:0006636;GO:0009535;GO:0009570;GO:0009637;GO:0009644;GO:0009749;GO:0010114;GO:0010218;GO:0010304;GO:0010319;GO:0016491;GO:0016620;GO:0016620;GO:0019216;GO:0019253;GO:0019344;GO:0031408;GO:0031969;GO:0042744;GO:0047100;GO:0050661;GO:0050661;GO:0051287;GO:0051287;GO:0055114;GO:0055114;GO:0055114;GO:0006006;GO:0006006;GO:0009409;GO:0009416;GO:0009507;GO:…	K05298	[EC:1.2.1.13]	11428156	glyceraldehyde-3-phosphate dehydrogenase B
Medtr4g079160	567.791	793.913	341.67	0.430362	-1.21638	1.1967e-05	0.00549283	4	30569730	30571434	+	1283	Medtr4g079160	GO:0008168;GO:0008168;GO:0008168;GO:0008171;GO:0008171;GO:0016740;GO:0032259;GO:0046983;GO:0046983;	-	-	11444460	orcinol O-methyltransferase
Medtr2g089510	1557.35	2223.79	890.905	0.400625	-1.31968	1.70636e-05	0.00709875	2	37843606	37846116	+	1036	Medtr2g089510	GO:0000165;GO:0006612;GO:0009409;GO:0009496;GO:0009496;GO:0009507;GO:0009535;GO:0009535;GO:0009536;GO:0009579;GO:0009595;GO:0009657;GO:0009697;GO:0009862;GO:0009867;GO:0009941;GO:0010196;GO:0010200;GO:0010310;GO:0010363;GO:0015979;GO:0015979;GO:0016020;GO:0016020;GO:0016020;GO:0016021;GO:0016021;GO:0016491;GO:0016491;GO:0016491;GO:0016679;GO:0016679;GO:0022900;GO:0031348;GO:0042651;GO:0042651;GO:…	K02636	[EC:7.1.1.6]	11427739	cytochrome b6-F complex iron-sulfur subunit
Medtr8g085560	141.835	204.5	79.1693	0.387136	-1.36909	2.10556e-05	0.00848138	8	35432972	35436227	+	1056	Medtr8g085560	GO:0006508;GO:0008233;GO:0008233;GO:0016020;GO:0016021;GO:0016021;	-	-	11406760	protease inhibitor/seed storage/LTP family protein
Medtr1g085560	593.695	838.149	349.242	0.416682	-1.26298	2.58082e-05	0.00992326	1	38219712	38222377	+	756	Medtr1g085560	GO:0000413;GO:0000413;GO:0003755;GO:0003755;GO:0003755;GO:0006457;GO:0006457;GO:0016853;	K03768	[EC:5.2.1.8]	25484726	peptidyl-prolyl cis-trans isomerase
Medtr3g111840	171.011	258.351	83.6716	0.323868	-1.62652	2.74469e-05	0.00999915	3	52331088	52332684	+	1038	Medtr3g111840	GO:0006481;GO:0008168;GO:0008168;GO:0008168;GO:0016740;GO:0018423;GO:0018423;GO:0032259;GO:0032259;GO:0032259;	-	-	25490188	leucine carboxyl methyltransferase
Medtr1g097270	43.8494	69.4471	18.2517	0.262814	-1.92789	2.75423e-05	0.00999915	1	43870650	43872571	+	788	Medtr1g097270	GO:0016020;GO:0016020;GO:0016020;GO:0016021;GO:0016021;	K02221	-	25485015	integral membrane protein, putative
Medtr4g104140	332.294	469.735	194.853	0.414814	-1.26946	2.75817e-05	0.00999915	4	43163284	43166613	+	1810	Medtr4g104140	GO:0003712;GO:0003712;GO:0004402;GO:0004402;GO:0005515;GO:0005634;GO:0005634;GO:0006355;GO:0006355;GO:0008270;GO:0008270;GO:0016573;GO:0003712;GO:0003712;GO:0004402;GO:0004402;GO:0005634;GO:0005634;GO:0006355;GO:0006355;GO:0008270;GO:0008270;GO:0016573;	-	-	11408709	BTB/POZ and TAZ domain protein
Medtr1g090730	549.579	745.192	353.967	0.475002	-1.074	2.80955e-05	0.010042	1	40743707	40748776	-	2698	Medtr1g090730	GO:0003824;GO:0003824;GO:0005975;GO:0005975;GO:0006108;GO:0006108;GO:0016491;GO:0016491;GO:0016491;GO:0016615;GO:0016615;GO:0016616;GO:0016616;GO:0046554;GO:0046554;GO:0046554;GO:0055114;GO:0055114;GO:0055114;GO:0003824;GO:0003824;GO:0005975;GO:0005975;GO:0006108;GO:0006108;GO:0016491;GO:0016491;GO:0016615;GO:0016615;GO:0016616;GO:0016616;GO:0055114;GO:0055114;	K00051	[EC:1.1.1.82]	25484827	NADP-dependent malate dehydrogenase
Medtr7g061840	46.3541	72.3733	20.335	0.280973	-1.83149	2.99633e-05	0.0103681	7	22384796	22390534	+	2869	Medtr7g061840	GO:0003677;GO:0003677;	-	-	25498486	double-strand telomere-binding protein, putative
Medtr1g031640	149.362	222.394	76.3293	0.343216	-1.54281	3.02337e-05	0.0103681	1	11066540	11068656	+	1027	Medtr1g031640	GO:0006952;GO:0006952;	-	-	11424253	pathogenesis-related protein bet V I family protein
Medtr3g062920	113.326	163.085	63.567	0.389779	-1.35927	3.48577e-05	0.0117945	3	28445861	28448457	-	1123	Medtr3g062920	GO:0009507;GO:0009579;GO:0016491;GO:0048529;GO:0055114;	-	-	25489165	hypothetical protein
Medtr2g461290	111.855	160.96	62.7499	0.389846	-1.35902	3.74005e-05	0.0122714	2	25307375	25315642	+	2146	Medtr2g461290	GO:0004017;GO:0004017;GO:0004017;GO:0004017;GO:0005524;GO:0005524;GO:0006139;GO:0006139;GO:0009507;GO:0009534;GO:0009535;GO:0009535;GO:0009941;GO:0009941;GO:0016301;GO:0016310;GO:0016740;GO:0016776;GO:0016776;GO:0019205;GO:0019205;GO:0046940;	K00939	[EC:2.7.4.3]	25488395	adenylate kinase
Medtr5g043580	154.42	230.317	78.5225	0.340932	-1.55244	3.82016e-05	0.0122714	5	19149983	19152526	-	893	Medtr5g043580	GO:0000023;GO:0010103;GO:0019252;	-	-	11417391	hypothetical protein
Medtr8g095030	705.513	983.042	427.984	0.435367	-1.1997	4.27731e-05	0.0130778	8	39714011	39718448	-	2723	Medtr8g095030	GO:0000166;GO:0004672;GO:0004672;GO:0004674;GO:0004674;GO:0005515;GO:0005524;GO:0005524;GO:0005524;GO:0006468;GO:0006468;GO:0006612;GO:0009963;GO:0010363;GO:0016020;GO:0016021;GO:0016021;GO:0016301;GO:0016310;GO:0016740;GO:0000166;GO:0004672;GO:0004672;GO:0004674;GO:0004674;GO:0005515;GO:0005524;GO:0005524;GO:0005524;GO:0006468;GO:0006468;GO:0016020;GO:0016021;GO:0016021;GO:0016301;GO:0016310;GO:…	-	-	11442448	LRR receptor-like kinase
Medtr1g116320	110.794	172.29	49.2972	0.286129	-1.80526	4.65306e-05	0.0138824	1	52576407	52579521	-	1366	Medtr1g116320	GO:0009535;GO:0009941;GO:0010027;	-	-	11440755	plastid lipid-associated protein
Medtr4g132260	214.971	303.129	126.813	0.418348	-1.25723	5.32492e-05	0.0150145	4	55262670	55265824	-	846	Medtr4g132260	GO:0004462;GO:0004462;GO:0016829;GO:0046872;GO:0046872;	K01759	[EC:4.4.1.5]	11439567	lactoylglutathione lyase-like protein
Medtr4g094625	341.835	467.155	216.514	0.463474	-1.10944	5.67235e-05	0.0154782	4	38401265	38404699	-	1316	Medtr4g094625	GO:0003824;GO:0003824;	-	-	25493402	thiamine monophosphate synthase
Medtr4g134780	178.525	250.748	106.302	0.42394	-1.23807	5.93474e-05	0.0160219	4	56492273	56494696	+	1821	Medtr4g134780	GO:0016491;GO:0016491;GO:0055114;GO:0055114;	-	-	25494380	All-trans-retinol 13,14-reductase
Medtr6g017260	114.594	164.435	64.7523	0.393785	-1.34452	6.14105e-05	0.0162335	6	6905838	6910549	-	1016	Medtr6g017260	-	-	-	25495610	thylakoid membrane slr0575-like protein
Medtr7g063260	11.6151	21.5052	1.72486	0.0802063	-3.64014	6.25903e-05	0.0163748	7	23025686	23027778	+	1076	Medtr7g063260	GO:0016491;GO:0016491;GO:0016491;GO:0050356;GO:0055114;GO:0055114;	K08081	[EC:1.1.1.206]	25498561	NAD(P)-binding rossmann-fold protein
Medtr2g079710	1136.92	1614.4	659.439	0.408472	-1.29169	6.5107e-05	0.0168594	2	33579928	33582833	-	1541	Medtr2g079710	GO:0009507;GO:0009507;GO:0009536;GO:0015979;GO:0015979;GO:0015995;GO:0015995;GO:0016491;GO:0016630;GO:0016630;GO:0016630;GO:0055114;GO:0055114;GO:0055114;	K00218	[EC:1.3.1.33]	25487370	NADPH-protochlorophyllide oxidoreductase
Medtr2g029370	1731.77	2460.82	1002.72	0.407474	-1.29522	7.58981e-05	0.0185199	2	10974809	10976406	-	1598	Medtr2g029370	GO:0009507;GO:0009522;GO:0009522;GO:0009534;GO:0009535;GO:0009538;GO:0009538;GO:0009579;GO:0009941;GO:0010287;GO:0015979;GO:0015979;GO:0016020;GO:0016491;GO:0019904;GO:0055114;	K02694	-	25486289	photosystem I reaction center subunit III
Medtr2g020160	143.949	206.416	81.4823	0.394747	-1.341	8.08042e-05	0.0191582	2	6683942	6685512	-	1571	Medtr2g020160	GO:0006636;GO:0009534;GO:0009941;GO:0009965;GO:0019344;GO:0033728;GO:0051744;	K19073	[EC:1.3.1.75]	11443863	3,8-divinyl protochlorophyllide A 8-vinyl reductase
Medtr4g133770	65.1619	101.589	28.7348	0.282854	-1.82187	8.15337e-05	0.0191582	4	55962768	55963564	+	797	Medtr4g133770	GO:0016020;GO:0016021;GO:0016021;	-	-	11439079	transmembrane protein, putative
Medtr8g012550	112.725	185.133	40.3181	0.217779	-2.19906	8.44724e-05	0.0196666	8	3604789	3606439	+	864	Medtr8g012550	GO:0006952;GO:0006952;	-	-	11425510	polyketide cyclase/dehydrase and lipid transporter
Medtr2g033020	415.821	562.696	268.946	0.47796	-1.06504	9.90138e-05	0.0225497	2	12449707	12453501	+	1538	Medtr2g033020	GO:0003676;GO:0003676;GO:0005840;GO:0005840;GO:0009570;GO:0010027;	K02945	-	11410196	30S ribosomal protein S1
Medtr4g082950	102.058	145.679	58.4365	0.401131	-1.31786	0.000100492	0.0225597	4	32250097	32257652	+	3017	Medtr4g082950	GO:0004645;GO:0004645;GO:0004645;GO:0005975;GO:0005975;GO:0005975;GO:0008184;GO:0008184;GO:0016740;GO:0016757;GO:0030170;GO:0030170;GO:0102250;GO:0102250;GO:0102499;GO:0102499;	K00688	[EC:2.4.1.1]	11445705	glycogen/starch/alpha-glucan phosphorylase family protein
Medtr3g491890	128.328	185.731	70.9246	0.381866	-1.38886	0.000119353	0.0261105	3	41845986	41850162	-	1036	Medtr3g491890	-	-	-	25491136	thylakoid lumenal 17.4 kDa protein
Medtr8g092680	41.3052	63.6335	18.9769	0.298221	-1.74554	0.000126782	0.0270366	8	38784455	38786802	-	1229	Medtr8g092680	GO:0009507;GO:0009570;GO:0010236;	-	-	11442583	plastid lipid-associated protein
Medtr7g084800	3628.84	5552.27	1705.4	0.307154	-1.70297	0.000141913	0.0293263	7	32728615	32732070	-	1679	Medtr7g084800	GO:0006006;GO:0006006;GO:0016491;GO:0016620;GO:0016620;GO:0050661;GO:0050661;GO:0051287;GO:0051287;GO:0055114;GO:0055114;GO:0055114;	K05298	[EC:1.2.1.13]	11437530	glyceraldehyde-3-phosphate dehydrogenase
Medtr3g010000	668.148	1034.03	302.269	0.292322	-1.77437	0.000142223	0.0293263	3	2257987	2258475	-	453	Medtr3g010000	GO:0009522;GO:0009522;GO:0009773;GO:0009780;GO:0009780;GO:0009941;GO:0009941;GO:0015979;GO:0015979;GO:0016020;GO:0016020;GO:0016020;GO:0016021;GO:0019344;GO:0030003;GO:0030093;GO:0030093;GO:0042550;GO:0042550;GO:0050821;GO:0070838;	K08905	-	11422409	photosystem I reaction center subunit V
Medtr4g100480	81.722	117.996	45.4478	0.385164	-1.37646	0.000142928	0.0293263	4	41422220	41425247	+	1379	Medtr4g100480	GO:0016787;GO:0016787;GO:0016787;	-	-	11409835	nudix family hydrolase
Medtr3g099180	180.061	249.184	110.938	0.445206	-1.16745	0.000143388	0.0293263	3	45466714	45470003	+	984	Medtr3g099180	GO:0005634;GO:0005634;GO:0005737;GO:0046982;GO:0046982;GO:0048579;GO:0005634;GO:0005634;GO:0046982;GO:0046982;	-	-	11429705	nuclear transcription factor Y protein
Medtr3g116110	91.7488	143.041	40.4565	0.282832	-1.82198	0.000146645	0.029535	3	54288323	54290545	+	1025	Medtr3g116110	GO:0005509;GO:0005509;GO:0009523;GO:0009523;GO:0009535;GO:0009654;GO:0009654;GO:0015979;GO:0015979;GO:0016491;GO:0019898;GO:0019898;GO:0031977;GO:0055114;	-	-	11418216	photosystem II reaction center PsbP family protein
Medtr3g463720	230.051	311.218	148.883	0.47839	-1.06374	0.000166563	0.032863	3	25539157	25542475	+	1057	Medtr3g463720	-	-	-	25490863	RING/U-box protein
Medtr1g093080	99.2699	140.279	58.2605	0.415318	-1.26771	0.000171354	0.033211	1	41922713	41924973	-	2024	Medtr1g093080	GO:0003677;GO:0003677;GO:0003677;GO:0005634;GO:0005634;GO:0003677;GO:0003677;GO:0003677;GO:0005634;GO:0005634;	-	-	11422364	myb-like transcription factor family protein
Medtr8g043480	128.529	178.93	78.1285	0.436643	-1.19547	0.000172671	0.033211	8	16687931	16693512	-	3113	Medtr8g043480	GO:0016787;GO:0016787;GO:0046856;GO:0046856;GO:0016787;GO:0016787;GO:0046856;GO:0046856;GO:0016787;GO:0016787;GO:0046856;GO:0046856;	-	-	11411806	inositol polyphosphate 5-phosphatase I
Medtr5g022300	1486.69	2236.04	737.344	0.329754	-1.60054	0.000172749	0.033211	5	8789171	8793126	+	2149	Medtr5g022300	GO:0016491;GO:0016491;GO:0016491;GO:0055114;GO:0055114;GO:0055114;GO:0000165;GO:0004324;GO:0004324;GO:0004324;GO:0006612;GO:0008266;GO:0009409;GO:0009507;GO:0009507;GO:0009535;GO:0009570;GO:0009595;GO:0009657;GO:0009697;GO:0009862;GO:0009867;GO:0009941;GO:0010200;GO:0010310;GO:0010363;GO:0016491;GO:0016491;GO:0016491;GO:0019761;GO:0031348;GO:0031977;GO:0043900;GO:0045157;GO:0055114;GO:0055114;GO:…	K02641	[EC:1.18.1.2]	11418744	leaf ferredoxin-NADP reductase
Medtr7g096150	90.1943	139.144	41.2442	0.296413	-1.75432	0.000178812	0.0338634	7	38558008	38559132	-	1033	Medtr7g096150	GO:0009507;GO:0009507;GO:0009523;GO:0009523;GO:0015979;GO:0015979;GO:0016020;GO:0016021;GO:0016021;	K02721	-	25499202	photosystem II reaction center W
Medtr5g081960	294.785	438.451	151.118	0.344664	-1.53674	0.000218441	0.0398805	5	35163436	35165325	+	1890	Medtr5g081960	GO:0016740;GO:0016747;GO:0016747;	-	-	11411313	HXXXD-type acyl-transferase family protein
Medtr3g070970	105.933	148.324	63.5415	0.428397	-1.22298	0.000222034	0.0399615	3	31863254	31865383	+	1307	Medtr3g070970	GO:0006355;GO:0006355;GO:0046983;GO:0046983;	-	-	11411370	transcription factor
Medtr4g082305	171.438	233.086	109.789	0.471022	-1.08613	0.000250525	0.0436785	4	32029066	32031775	+	1680	Medtr4g082305	GO:0005515;GO:0008168;GO:0008168;GO:0016740;GO:0032259;GO:0005515;GO:0008168;GO:0009507;GO:0009507;GO:0009507;GO:0009570;GO:0009570;GO:0016279;GO:0016279;GO:0016740;GO:0018023;GO:0018023;GO:0030785;GO:0030785;GO:0030785;GO:0032259;	K00592	-	25492966	rubisco large subunit N-methyltransferase
Medtr7g006900	174.593	237.396	111.791	0.470904	-1.08649	0.000259662	0.0445233	7	1265616	1270905	+	2682	Medtr7g006900	GO:0005506;GO:0005506;GO:0016020;GO:0016021;GO:0016021;GO:0016705;GO:0016705;GO:0020037;GO:0020037;GO:0055114;GO:0055114;GO:0005506;GO:0005506;GO:0016705;GO:0016705;GO:0020037;GO:0020037;GO:0055114;GO:0055114;	K10717	-	25497406	cytochrome P450 family protein
Medtr5g027000	132.751	194.995	70.5065	0.361582	-1.46761	0.00026943	0.0458882	5	11187311	11188094	-	784	Medtr5g027000	GO:0005509;GO:0005509;	-	-	11415701	calcium-binding EF-hand protein
Medtr5g014260	852.017	1287.34	416.694	0.323687	-1.62733	0.000275431	0.0463418	5	4760173	4761875	-	913	Medtr5g014260	GO:0005739;GO:0005739;GO:0005960;GO:0005960;GO:0005960;GO:0019464;GO:0019464;GO:0019464;GO:0005960;GO:0005960;GO:0019464;GO:0019464;	K02437	-	11433975	glycine cleavage system H protein
Medtr3g031790	104.996	146.295	63.6968	0.435399	-1.19959	0.00028801	0.0477702	3	26600780	26604342	-	1280	Medtr3g031790	-	K08059	-	11405233	gamma interferon inducible lysosomal thiol reductase
Medtr7g077670	39.1596	59.6862	18.6329	0.312181	-1.67954	0.000293979	0.0484435	7	29289691	29291642	+	1591	Medtr7g077670	GO:0016491;GO:0016491;GO:0016491;GO:0016707;GO:0046872;GO:0046872;GO:0051213;GO:0051213;GO:0055114;GO:0055114;GO:0055114;	-	-	11427527	gibberellin 2-beta-dioxygenase
Medtr1g072260	246.695	374.335	119.056	0.318045	-1.6527	0.000314689	0.0515216	1	32063750	32066134	-	1370	Medtr1g072260	GO:0003824;GO:0003824;GO:0050662;GO:0050662;	-	-	11429745	stem-loop-binding protein of 41 kDa protein A
Medtr4g064750	508.719	740.965	276.474	0.373127	-1.42226	0.000318358	0.0517883	4	24211056	24213980	+	1662	Medtr4g064750	GO:0007623;GO:0009507;GO:0009508;GO:0009534;GO:0009535;GO:0009941;GO:0016020;GO:0042644;GO:0098572;	-	-	11416800	plastid transcriptionally active protein
Medtr3g092720	111.859	161.765	61.9529	0.382982	-1.38465	0.00033111	0.0528719	3	42364192	42367168	-	2271	Medtr3g092720	GO:0005840;GO:0005840;GO:0009507;GO:0009534;GO:0009534;GO:0009534;GO:0009570;GO:0009570;GO:0009570;GO:0044238;GO:0044238;	-	-	11425207	sigma 54 modulation protein/S30EA ribosomal protein
Medtr3g114850	2394.55	3712.97	1076.13	0.28983	-1.78672	0.000332781	0.0528719	3	53626328	53626831	-	504	Medtr3g114850	GO:0005507;GO:0005507;GO:0005507;GO:0009055;GO:0009055;GO:0009055;GO:0009507;GO:0009535;GO:0009535;GO:0009579;GO:0016020;GO:0022900;GO:0046872;GO:0055114;	K02638	-	11426844	plastocyanin
Medtr2g023290	779.816	1149.1	410.53	0.357261	-1.48495	0.000336119	0.0528719	2	8196994	8205127	+	3066	Medtr2g023290	GO:0015986;GO:0015986;GO:0016787;GO:0045261;GO:0045261;GO:0046933;GO:0046933;GO:0099132;	K02115	-	25486159	F0F1 ATP synthase subunit gamma
Medtr4g116277	201.859	271.49	132.229	0.487048	-1.03787	0.00033752	0.0528719	4	48106636	48107654	-	1019	Medtr4g116277	-	-	-	25493967	plant/F18G18-20 protein
Medtr1g088765	87.9242	138.104	37.744	0.273301	-1.87144	0.000352002	0.0548021	1	39743073	39746516	+	2247	Medtr1g088765	-	K14487	-	25484754	indole-3-acetic acid-amido synthetase
Medtr1g066530	120.594	197.547	43.6416	0.220917	-2.17842	0.000355561	0.0550187	1	28559518	28560800	+	1283	Medtr1g066530	GO:0046872;GO:0046872;	-	-	11434140	albumin-2 protein
Medtr4g019580	71.1019	119.168	23.0362	0.193309	-2.37102	0.000362973	0.0557948	4	6145157	6150261	-	2203	Medtr4g019580	GO:0016020;GO:0016020;GO:0016020;GO:0016021;GO:0016021;GO:0022857;GO:0022857;GO:0055085;GO:0055085;	-	-	25491519	peptide/nitrate transporter plant
Medtr2g021255	1417.55	2040.86	794.242	0.389169	-1.36153	0.000409074	0.0607081	2	7202259	7207199	-	3117	Medtr2g021255	GO:0000166;GO:0003824;GO:0003824;GO:0004356;GO:0004356;GO:0004356;GO:0004356;GO:0005524;GO:0005524;GO:0006542;GO:0006542;GO:0006807;GO:0006807;GO:0016874;GO:0000166;GO:0003824;GO:0003824;GO:0004356;GO:0004356;GO:0004356;GO:0005524;GO:0005524;GO:0006542;GO:0006542;GO:0006807;GO:0006807;GO:0016874;	K01915	[EC:6.3.1.2]	25486062	glutamine synthetase domain protein
Medtr8g070530	262.367	395.849	128.885	0.325592	-1.61886	0.000415394	0.0609833	8	29947338	29957603	-	3922	Medtr8g070530	GO:0000023;GO:0000155;GO:0004672;GO:0004672;GO:0005524;GO:0005524;GO:0005622;GO:0006468;GO:0006468;GO:0009644;GO:0009785;GO:0010027;GO:0010103;GO:0010114;GO:0010118;GO:0010218;GO:0010362;GO:0016556;GO:0016740;GO:0019252;GO:0019761;GO:0035304;GO:0042793;GO:0046777;	K20715	[EC:2.7.11.1]	11445312	phototropin-2 protein
Medtr2g020240	1447.4	2070.56	824.238	0.398075	-1.32889	0.00045909	0.064724	2	6716976	6720049	+	2755	Medtr2g020240	GO:0000272;GO:0000272;GO:0000272;GO:0005975;GO:0008152;GO:0016161;GO:0016161;GO:0016161;GO:0016787;GO:0016798;GO:0102229;GO:0102229;GO:0000272;GO:0000272;GO:0000272;GO:0005975;GO:0008152;GO:0016161;GO:0016161;GO:0016161;GO:0016787;GO:0016798;GO:0102229;GO:0102229;	-	-	11439328	beta-amylase
Medtr7g039110	47.4844	70.0666	24.9022	0.355407	-1.49246	0.0004617	0.0647324	7	14537564	14540437	-	1243	Medtr7g039110	GO:0006355;GO:0006355;GO:0046983;GO:0046983;	-	-	25498076	transcription factor
Medtr1g110750	292.489	390.622	194.357	0.497558	-1.00706	0.00050977	0.0699196	1	49982969	49989551	+	1172	Medtr1g110750	GO:0003735;GO:0003735;GO:0005622;GO:0005840;GO:0005840;GO:0005840;GO:0006412;GO:0006412;GO:0009507;GO:0009570;GO:0009570;GO:0009735;GO:0009735;GO:0009941;GO:0009941;GO:0015934;GO:0015934;	K02876	-	25485490	50S ribosomal protein L15
Medtr8g100120	139.667	198.515	80.819	0.407118	-1.29648	0.00051789	0.0699196	8	40181722	40184021	-	1287	Medtr8g100120	GO:0008168;GO:0009535;GO:0015995;GO:0015995;GO:0016020;GO:0016021;GO:0016740;GO:0031969;GO:0032259;GO:0032259;GO:0046406;GO:0046406;GO:0046406;GO:0046777;	K03428	[EC:2.1.1.11]	11442990	Mg-protoporphyrin IX methyltransferase
Medtr8g093750	35.8664	54.4598	17.2731	0.317172	-1.65666	0.000517984	0.0699196	8	39227365	39229931	+	816	Medtr8g093750	GO:0005515;	-	-	11427574	TPR repeat protein
Medtr8g012420	260.712	380.235	141.189	0.37132	-1.42926	0.000536639	0.0716753	8	3542307	3545267	+	1776	Medtr8g012420	-	-	-	11429438	DUF760 family protein
Medtr5g012110	139.747	200.616	78.8773	0.393176	-1.34675	0.000557101	0.0740185	5	3583273	3585463	-	1326	Medtr5g012110	GO:0009535;GO:0009543;	-	-	11443119	thylakoid lumenal protein
Medtr4g101750	1619.53	2355.16	883.904	0.375306	-1.41386	0.000566848	0.0745331	4	42085957	42090226	-	2934	Medtr4g101750	GO:0000023;GO:0000166;GO:0003746;GO:0003746;GO:0003746;GO:0003924;GO:0003924;GO:0003924;GO:0005525;GO:0005525;GO:0005525;GO:0005622;GO:0006354;GO:0006412;GO:0006414;GO:0006414;GO:0006414;GO:0009507;GO:0009507;GO:0009507;GO:0009536;GO:0009570;GO:0009793;GO:0009845;GO:0009941;GO:0010027;GO:0010228;GO:0019252;GO:0035304;GO:0042793;GO:0048481;GO:0000166;GO:0003746;GO:0003746;GO:0003746;GO:0003924;GO:…	K02355	-	11405549	translation elongation factor EF protein
Medtr2g019900	36.326	67.4946	5.15742	0.0764124	-3.71005	0.000578104	0.0756213	2	6567364	6568225	-	862	Medtr2g019900	GO:0004791;GO:0005623;GO:0005623;GO:0009055;GO:0009055;GO:0015035;GO:0015035;GO:0016491;GO:0022900;GO:0045454;GO:0045454;GO:0055114;GO:0055114;GO:0098869;	K03676	-	11441859	monothiol glutaredoxin-S2 protein
Medtr8g107010	223.785	336.384	111.186	0.330535	-1.59713	0.000603619	0.0767757	8	45206393	45207788	+	1189	Medtr8g107010	GO:0000023;GO:0000413;GO:0003755;GO:0003755;GO:0009543;GO:0016853;GO:0019252;	-	-	11413701	FKBP-type peptidyl-prolyl cis-trans isomerase
Medtr3g089065	483.092	733.271	232.912	0.317635	-1.65456	0.000607085	0.0767757	3	40773453	40774783	+	528	Medtr3g089065	GO:0006662;GO:0006662;GO:0009507;GO:0009507;GO:0009657;GO:0009657;GO:0015035;GO:0015035;GO:0016491;GO:0016671;GO:0016671;GO:0042744;GO:0042744;GO:0045454;GO:0045454;GO:0055114;GO:0055114;	K03671	-	25489759	thioredoxin M-type protein
Medtr4g037505	44.6336	65.9566	23.3106	0.353423	-1.50053	0.000667614	0.0830492	4	13800984	13801668	-	685	Medtr4g037505	GO:0016020;GO:0016021;GO:0016021;	-	-	25491952	photosystem II 5 kDa protein
Medtr7g084000	394.849	546.168	243.53	0.445888	-1.16525	0.000686149	0.0849386	7	32359808	32361765	-	1335	Medtr7g084000	GO:0007623;GO:0009507;GO:0009507;GO:0030003;GO:0070838;GO:0098807;	-	-	11436793	light-regulated protein, putative
Medtr1g078030	679.933	909.113	450.752	0.495815	-1.01212	0.000748551	0.0900283	1	34884479	34888325	-	1833	Medtr1g078030	GO:0008289;GO:0008289;GO:0016020;GO:0016021;GO:0016021;	-	-	25484577	mammalian STARD2 lipid-binding START domain protein
Medtr1g069235	204.48	288.688	120.272	0.416617	-1.26321	0.00075391	0.0902452	1	29816886	29819066	+	1460	Medtr1g069235	GO:0009522;GO:0009522;GO:0009538;GO:0009538;GO:0015979;GO:0015979;	K02693	-	25484169	photosystem I reaction center subunit IV A
Medtr4g071860	412.935	562.492	263.379	0.468236	-1.09469	0.000816288	0.094836	4	27248887	27252110	+	1699	Medtr4g071860	GO:0003824;GO:0003824;GO:0004332;GO:0004332;GO:0004332;GO:0006096;GO:0006096;GO:0006096;GO:0016829;	K01623	[EC:4.1.2.13]	11445395	fructose-bisphosphate aldolase class I
Medtr1g052535	1773.34	2394.38	1152.31	0.481255	-1.05513	0.000817668	0.094836	1	21392688	21400938	-	3402	Medtr1g052535	GO:0003924;GO:0003924;GO:0005525;GO:0005525;GO:0016787;GO:0003924;GO:0003924;GO:0005525;GO:0005525;	K06207	-	25483409	GTP-binding protein TypA/BipA
Medtr5g082580	55.556	82.4835	28.6285	0.347081	-1.52665	0.000819875	0.094836	5	35506838	35510948	+	2170	Medtr5g082580	GO:0004435;GO:0004435;GO:0004435;GO:0005622;GO:0006629;GO:0006629;GO:0006629;GO:0007165;GO:0007165;GO:0007165;GO:0008081;GO:0008081;GO:0016042;GO:0016042;GO:0016787;GO:0035556;GO:0035556;	K05857	[EC:3.1.4.11]	11421265	phosphoinositide-specific phospholipase C family protein
Medtr6g060175	2921.14	4052.03	1790.25	0.441815	-1.17848	0.000823443	0.094836	6	20668553	20672457	+	1455	Medtr6g060175	GO:0009507;GO:0009517;GO:0009522;GO:0009522;GO:0009523;GO:0009535;GO:0009536;GO:0009579;GO:0009637;GO:0009765;GO:0009765;GO:0009783;GO:0010114;GO:0010196;GO:0010207;GO:0010218;GO:0010287;GO:0015979;GO:0016020;GO:0016020;GO:0016020;GO:0016021;GO:0016021;GO:0016168;GO:0016168;GO:0018298;GO:0018298;GO:0019904;GO:0009507;GO:0009522;GO:0009522;GO:0009523;GO:0009523;GO:0009535;GO:0009535;GO:0009536;GO:…	K08916	-	25496571	light-harvesting complex I chlorophyll A/B-binding protein
Medtr2g013570	109.699	159.135	60.2638	0.378697	-1.40089	0.000823966	0.094836	2	3673518	3676788	+	1619	Medtr2g013570	GO:0016311;GO:0016787;GO:0047538;	-	-	25485937	phosphoglycerate mutase
Medtr8g088720	16.4126	28.7299	4.09532	0.142545	-2.81051	0.000832898	0.094836	8	36851051	36851760	-	710	Medtr8g088720	GO:0009055;GO:0009055;GO:0009507;GO:0009507;GO:0009536;GO:0022900;GO:0022900;GO:0046872;GO:0046872;GO:0051536;GO:0051536;GO:0051536;GO:0051537;GO:0051537;GO:0051537;GO:0055114;	K02639	-	11408737	2Fe-2S ferredoxin superfamily protein
Medtr3g101670	54.3137	85.4223	23.205	0.27165	-1.88018	0.00083566	0.094836	3	46809109	46810944	-	1081	Medtr3g101670	GO:0009409;GO:0009507;GO:0009522;GO:0009523;GO:0009523;GO:0009535;GO:0009535;GO:0009535;GO:0009536;GO:0009579;GO:0009644;GO:0009645;GO:0009765;GO:0009765;GO:0009768;GO:0009768;GO:0009782;GO:0009782;GO:0010027;GO:0015979;GO:0016020;GO:0016020;GO:0016020;GO:0016021;GO:0016021;GO:0016168;GO:0016168;GO:0018298;GO:0018298;GO:0031409;GO:0031409;GO:0042803;	K08911	-	11431390	light-harvesting complex I chlorophyll A/B-binding protein
Medtr2g101820	432.993	599.127	266.859	0.445413	-1.16679	0.000886654	0.100003	2	43807820	43809677	+	1153	Medtr2g101820	GO:0009522;GO:0009522;GO:0009538;GO:0009538;GO:0015979;GO:0015979;GO:0009522;GO:0009522;GO:0009538;GO:0009538;GO:0015979;GO:0015979;	K02695	-	11442004	photosystem I reaction center subunit VI
Medtr3g088040	985.844	1456.55	515.135	0.353668	-1.49953	0.00090757	0.100823	3	39910676	39912770	-	1101	Medtr3g088040	GO:0000023;GO:0009507;GO:0009507;GO:0009517;GO:0010027;GO:0010103;GO:0010196;GO:0016020;GO:0016021;GO:0016021;GO:0019252;GO:0019344;GO:0051738;	K03542	-	11419130	light-harvesting complex I chlorophyll A/B-binding protein
Medtr4g009340	130.087	203.409	56.7658	0.279072	-1.84129	0.000909821	0.100823	4	1947409	1949429	+	2021	Medtr4g009340	GO:0016020;GO:0016021;GO:0016021;	-	-	11418694	UPF0481 plant-like protein
Medtr3g013460	105.655	144.006	67.3035	0.467365	-1.09738	0.000937449	0.102592	3	3620649	3623394	+	2072	Medtr3g013460	GO:0009535;GO:0009535;GO:0009535;GO:0009965;GO:0010027;GO:0034660;GO:0042793;GO:0061635;GO:0061635;GO:0009535;GO:0009535;GO:0061635;GO:0061635;	-	-	11417418	proline-rich family protein [Source:Projected from Arabidopsis thaliana (AT5G07020) TAIR;Acc:AT5G07020]
Medtr7g116795	321.258	454.08	188.436	0.414984	-1.26887	0.00094219	0.102618	7	48250629	48252424	+	968	Medtr7g116795	GO:0004812;GO:0009535;GO:0009579;GO:0009579;GO:0009941;GO:0010287;GO:0016020;GO:0016021;GO:0016021;	-	-	25499725	thylakoid membrane phosphoprotein 14 kDa protein
Medtr8g075610	11.3534	19.9093	2.7975	0.140513	-2.83123	0.000952602	0.103278	8	31964879	31967387	-	1452	Medtr8g075610	GO:0016740;GO:0016747;GO:0016747;	K13065	[EC:2.3.1.133]	11438044	shikimate/quinate hydroxycinnamoyltransferase
Medtr8g105740	365.275	503.256	227.294	0.451647	-1.14673	0.000956391	0.103278	8	44588905	44593458	-	3575	Medtr8g105740	GO:0003824;GO:0003824;GO:0003825;GO:0004805;GO:0004805;GO:0005992;GO:0005992;GO:0016311;GO:0016740;GO:0016757;GO:0016787;	K16055	-	11406035	trehalose-6-phosphate synthase domain protein
Medtr1g061850	55.7489	89.6574	21.8403	0.243597	-2.03743	0.00102044	0.107898	1	27011727	27014868	+	774	Medtr1g061850	GO:0000413;GO:0003755;GO:0003755;GO:0009507;GO:0009534;GO:0009535;GO:0009535;GO:0009535;GO:0009543;GO:0009579;GO:0016853;GO:0042631;	-	-	11420788	FKBP-type peptidyl-prolyl cis-trans isomerase
Medtr1g040310	18.0422	29.5245	6.55987	0.222184	-2.17018	0.00105095	0.109784	1	14868892	14870403	+	1512	Medtr1g040310	GO:0016740;GO:0016757;GO:0016758;GO:0016758;GO:0102240;	-	-	25482875	UDP-glucosyltransferase family protein
Medtr4g087160	7.52421	13.9995	1.04888	0.0749228	-3.73845	0.00105857	0.109784	4	34147846	34149676	-	965	Medtr4g087160	GO:0009793;GO:0010183;GO:0010183;GO:0036033;GO:0036033;GO:0010183;GO:0010183;GO:0036033;GO:0036033;	-	-	11443454	maternal effect embryo arrest protein, putative
Medtr3g462220	417.368	633.131	201.605	0.318425	-1.65097	0.00107455	0.110777	3	24832582	24834600	+	986	Medtr3g462220	-	-	-	25490762	maternal effect embryo arrest protein, putative
Medtr7g073380	28.8944	48.007	9.78173	0.203756	-2.29508	0.00107821	0.110777	7	27429632	27431618	-	1326	Medtr7g073380	GO:0003677;GO:0003700;GO:0003700;GO:0005634;GO:0005634;GO:0006355;GO:0006355;GO:0043565;GO:0043565;	-	-	11442088	WRKY transcription factor
Medtr7g117970	71.2244	108.089	34.3602	0.31789	-1.6534	0.0010879	0.11126	7	48956101	48958693	+	1308	Medtr7g117970	GO:0009534;GO:0009706;GO:0010027;GO:0016020;GO:0016021;GO:0016021;	-	-	11423197	plant/F21F14-40 protein
Medtr8g069390	99.8951	141.796	57.994	0.408996	-1.28984	0.0011216	0.113398	8	29052302	29057476	+	2376	Medtr8g069390	GO:0005315;GO:0005315;GO:0006817;GO:0006817;GO:0006817;GO:0009556;GO:0009673;GO:0009706;GO:0015293;GO:0016020;GO:0016020;GO:0016020;GO:0016021;GO:0016021;GO:0052543;GO:0055085;	K14640	-	11419521	phosphate transporter 2-1
Medtr5g080450	517.86	783.793	251.927	0.32142	-1.63747	0.00114825	0.115175	5	34433065	34438020	-	1763	Medtr5g080450	GO:0005524;GO:0005524;	-	-	11442149	ribulose bisphosphate carboxylase/oxygenase activase
Medtr8g099920	195.29	297.465	93.1145	0.313027	-1.67564	0.00117094	0.116529	8	40284641	40286751	-	1123	Medtr8g099920	GO:0006633;GO:0006633;GO:0006633;GO:0006633;GO:0006633;GO:0006633;GO:0009416;GO:0009570;GO:0009735;GO:0009941;	-	-	11442988	acyl carrier protein
Medtr2g090200	22.1338	34.9103	9.35736	0.26804	-1.89948	0.0011988	0.117915	2	38278125	38278915	+	791	Medtr2g090200	GO:0010207;GO:0010207;	K08902	-	25487627	photosystem II Pbs27 protein
Medtr8g006995	33.1246	49.7246	16.5246	0.332322	-1.58934	0.00122897	0.12007	8	1158834	1161535	+	1336	Medtr8g006995	GO:0003735;GO:0003735;GO:0005840;GO:0005840;GO:0005840;GO:0006412;GO:0006412;	K02926	-	25500064	50S ribosomal protein L4, bacterial/organelle protein
Medtr8g009290	61.2541	86.6268	35.8815	0.414208	-1.27157	0.00125543	0.1216	8	2106435	2111759	-	1757	Medtr8g009290	GO:0009941;	-	-	11413709	pigment defective 320 protein, putative
Medtr5g008050	219.083	314.186	123.98	0.394607	-1.34151	0.00127189	0.121931	5	1646673	1649325	+	1217	Medtr5g008050	GO:0005506;GO:0005506;GO:0005515;GO:0009535;GO:0009637;GO:0009657;GO:0009941;GO:0010114;GO:0010218;GO:0016020;GO:0016021;GO:0016021;GO:0005515;	-	-	11436731	rubredoxin family protein
Medtr3g435460	491.617	718.578	264.655	0.368304	-1.44103	0.00130076	0.12313	3	11610138	11613272	+	1760	Medtr3g435460	GO:0009507;GO:0009522;GO:0009522;GO:0009523;GO:0009523;GO:0009535;GO:0009535;GO:0009536;GO:0009579;GO:0009765;GO:0009765;GO:0015979;GO:0016020;GO:0016020;GO:0016020;GO:0016021;GO:0016021;GO:0016168;GO:0016168;GO:0018298;GO:0018298;GO:0009507;GO:0009522;GO:0009522;GO:0009523;GO:0009523;GO:0009535;GO:0009535;GO:0009536;GO:0009579;GO:0009765;GO:0009765;GO:0015979;GO:0016020;GO:0016020;GO:0016020;GO:…	K08910	-	25490405	light-harvesting complex I chlorophyll A/B-binding protein
Medtr4g015570	287.286	437.46	137.113	0.31343	-1.67379	0.00131501	0.123463	4	4671256	4673903	-	1251	Medtr4g015570	GO:0009507;GO:0009522;GO:0009522;GO:0009523;GO:0009523;GO:0009535;GO:0009535;GO:0009535;GO:0009536;GO:0009579;GO:0009644;GO:0009765;GO:0009765;GO:0010287;GO:0015979;GO:0016020;GO:0016020;GO:0016020;GO:0016021;GO:0016021;GO:0016168;GO:0016168;GO:0018298;GO:0018298;	K08915	-	11422473	light-harvesting complex I chlorophyll A/B-binding protein
Medtr1g026820	127.519	204.949	50.0888	0.244397	-2.0327	0.00136934	0.126363	1	8791012	8792717	-	721	Medtr1g026820	GO:0009522;GO:0009522;GO:0015979;GO:0015979;GO:0016020;GO:0016020;GO:0009522;GO:0009522;GO:0009535;GO:0015979;GO:0015979;GO:0016020;GO:0016020;GO:0016491;GO:0055114;	K02698	-	25482249	photosystem I reaction center subunit X psaK
Medtr2g040060	165.418	225.322	105.514	0.46828	-1.09456	0.0013855	0.126903	2	17570312	17577439	+	1876	Medtr2g040060	GO:0010103;GO:0016117;GO:0016117;GO:0016123;GO:0016705;GO:0016705;GO:0016853;GO:0031969;GO:0045435;GO:0055114;	K06444	[EC:5.5.1.18]	11438775	lycopene epsilon cyclase
Medtr8g010330	71.7714	103.292	40.2509	0.389681	-1.35963	0.00140032	0.127369	8	2644265	2648876	-	1845	Medtr8g010330	GO:0000463;GO:0000463;GO:0000463;GO:0000466;GO:0000466;GO:0000466;GO:0005634;GO:0005654;GO:0005654;GO:0005654;GO:0005730;GO:0005730;GO:0005730;GO:0006364;GO:0030687;GO:0030687;GO:0030687;GO:0042254;GO:0042254;GO:0042254;GO:0042273;GO:0043021;GO:0043021;GO:0043021;	K14843	-	25500225	pescadillo-like protein
Medtr8g106680	297.315	457.329	137.3	0.300221	-1.7359	0.00141338	0.128097	8	45027673	45030288	+	2616	Medtr8g106680	GO:0005623;GO:0005623;GO:0009902;GO:0009902;GO:0010027;GO:0035304;GO:0042793;	-	-	11426509	plastid movement impaired protein
Medtr3g118430	328.577	447.661	209.493	0.467972	-1.09551	0.00143755	0.128907	3	55419693	55423184	-	2865	Medtr3g118430	GO:0009534;GO:0009637;GO:0010114;GO:0010218;GO:0016491;GO:0050446;GO:0055114;	-	-	11418459	NAD-dependent epimerase/dehydratase family protein
Medtr8g104190	49.6099	82.097	17.1227	0.208566	-2.26142	0.00146813	0.129814	8	43867638	43869522	+	1651	Medtr8g104190	GO:0005515;GO:0005634;GO:0005634;GO:0008270;GO:0008270;GO:0009641;	-	-	11411153	zinc finger constans-like protein
Medtr8g090025	58.0003	86.2217	29.7789	0.345376	-1.53376	0.00148672	0.130469	8	37676410	37680694	+	1274	Medtr8g090025	GO:0016787;GO:0016787;GO:0016787;GO:0016787;GO:0016787;GO:0016787;	-	-	25501884	haloacid dehalogenase-like hydrolase
Medtr1g045140	20.7764	32.805	8.74779	0.26666	-1.90692	0.00149282	0.130469	1	16946691	16948222	-	783	Medtr1g045140	GO:0009414;GO:0009535;GO:0009637;GO:0009644;GO:0009644;GO:0009644;GO:0009773;GO:0009773;GO:0010114;GO:0010117;GO:0010218;GO:0071484;	-	-	11434471	proton gradient regulation protein
Medtr2g070420	1104.14	1792.07	416.203	0.232247	-2.10627	0.0015131	0.131051	2	29642100	29646961	+	2142	Medtr2g070420	GO:0003824;GO:0003824;GO:0003973;GO:0010181;GO:0010181;GO:0016491;GO:0016491;GO:0016491;GO:0052852;GO:0052853;GO:0052854;GO:0055114;GO:0055114;GO:0055114;GO:0055114;	K11517	[EC:1.1.3.15]	25487060	peroxisomal (S)-2-hydroxy-acid oxidase GLO1
Medtr7g115120	275.655	418.302	133.009	0.317973	-1.65303	0.00154365	0.13279	7	47526543	47529841	+	1988	Medtr7g115120	GO:0003700;GO:0003700;GO:0006355;GO:0006355;	-	-	11425681	transcription factor bZIP88
Medtr8g461390	90.6234	123.159	58.0881	0.471653	-1.0842	0.00157478	0.133345	8	21601067	21603197	+	1064	Medtr8g461390	-	-	-	25502484	SOUL heme-binding family protein
Medtr6g086600	144.924	210.868	78.9795	0.374544	-1.41679	0.00157637	0.133345	6	32166446	32172332	-	2067	Medtr6g086600	GO:0000023;GO:0005524;GO:0005524;GO:0009570;GO:0010027;GO:0019252;GO:0000023;GO:0005524;GO:0005524;GO:0009570;GO:0010027;GO:0019252;	-	-	11433745	nucleotide-binding protein
Medtr4g054960	112.881	151.652	74.1097	0.488683	-1.03303	0.00161375	0.135126	4	19957311	19963411	+	2407	Medtr4g054960	GO:0000023;GO:0006655;GO:0009535;GO:0010027;GO:0010075;GO:0016363;GO:0019252;GO:0019760;GO:0034660;GO:0042646;	-	-	11445122	MAR-binding filament-like protein, putative
Medtr1g079870	29.6176	44.8044	14.4308	0.322084	-1.63449	0.00167535	0.137165	1	35481025	35482817	-	1793	Medtr1g079870	-	-	-	11435114	hypothetical protein
Medtr5g076380	147.649	201.092	94.205	0.468467	-1.09398	0.00168035	0.137165	5	32566132	32571914	+	2785	Medtr5g076380	GO:0016787;GO:0016787;	K10706	[EC:3.6.4.-]	11436417	P-loop nucleoside triphosphate hydrolase superfamily protein
Medtr2g021242	157.275	215.873	98.6771	0.457107	-1.1294	0.00168099	0.137165	2	7191378	7194478	-	1287	Medtr2g021242	GO:0003824;GO:0003824;GO:0004356;GO:0004356;GO:0004356;GO:0006542;GO:0006542;GO:0006807;GO:0006807;GO:0016874;	K01915	[EC:6.3.1.2]	25486059	glutamine synthetase domain protein
Medtr3g104980	40.4827	60.418	20.5474	0.340088	-1.55602	0.00172305	0.139699	3	48394599	48395924	+	788	Medtr3g104980	GO:0009507;GO:0009535;GO:0009535;GO:0009535;GO:0010598;GO:0010598;GO:0016020;GO:0016021;GO:0016021;	K23052	[EC:1.6.5.-]	11421544	DnaJ heat shock amino-terminal domain protein, putative
Medtr8g090220	16.1074	26.2918	5.92307	0.225282	-2.1502	0.00174301	0.140576	8	37858396	37862539	+	1971	Medtr8g090220	GO:0005515;GO:0005515;	-	-	25501914	phototropic-responsive NPH3 family protein
Medtr1g030890	121.89	162.744	81.0363	0.497939	-1.00596	0.00174495	0.140576	1	10834276	10839511	-	3029	Medtr1g030890	GO:0009734;GO:0009734;GO:0016020;GO:0016021;GO:0016021;GO:0016021;GO:0055085;GO:0055085;GO:0009734;GO:0009734;GO:0016020;GO:0016021;GO:0016021;GO:0016021;GO:0055085;GO:0055085;	K13947	-	25482498	auxin efflux carrier family transporter
Medtr1g015290	65.2432	109.283	21.2035	0.194024	-2.36569	0.00178324	0.142306	1	3764474	3765010	+	537	Medtr1g015290	GO:0009523;GO:0009523;GO:0015979;GO:0015979;GO:0016020;GO:0016020;GO:0016020;GO:0016021;GO:0016021;GO:0016491;GO:0055114;	K22048	-	11428767	ultraviolet-B-repressible protein
Medtr4g073530	67.8076	93.9012	41.7139	0.444232	-1.17062	0.00184707	0.146478	4	27877517	27879038	-	1228	Medtr4g073530	-	K19366	-	25492774	senescence/dehydration-associated-like protein
Medtr1g076570	97.328	150.606	44.0496	0.292481	-1.77358	0.00193539	0.150658	1	34137655	34140386	-	1671	Medtr1g076570	GO:0008168;GO:0008168;GO:0008168;GO:0016020;GO:0016021;GO:0016021;GO:0016740;GO:0032259;GO:0032259;GO:0032259;GO:0102550;	K12502	[EC:2.1.1.295]	25484476	2-methyl-6-phytylbenzoquinone methyltransferase
Medtr1g088910	11.6467	22.238	1.05549	0.0474636	-4.39704	0.00206553	0.158359	1	39846459	39847296	+	838	Medtr1g088910	GO:0004791;GO:0005623;GO:0005623;GO:0009055;GO:0009055;GO:0015035;GO:0015035;GO:0016491;GO:0022900;GO:0045454;GO:0045454;GO:0055114;GO:0098869;	K03676	-	25484773	glutaredoxin-C1 protein
Medtr8g022300	28.2735	42.71	13.8371	0.323978	-1.62603	0.00208229	0.158674	8	7896500	7898097	-	1141	Medtr8g022300	-	-	-	11414396	dormancy/auxin associated protein
Medtr5g053270	315.839	520.53	111.147	0.213526	-2.22751	0.00214792	0.162523	5	21962356	21968047	+	3753	Medtr5g053270	-	-	-	11442126	CHUP1-like protein
Medtr5g017980	24.0295	37.0344	11.0246	0.297686	-1.74814	0.00218739	0.164024	5	6673878	6676089	-	1374	Medtr5g017980	GO:0003677;GO:0003677;GO:0003677;GO:0005634;GO:0005634;GO:0003677;GO:0003677;GO:0003677;GO:0005634;GO:0005634;GO:0003677;GO:0003677;GO:0003677;GO:0005634;GO:0005634;	-	-	11416542	myb-like DNA-binding domain, shaqkyf class protein
Medtr1g033840	76.5172	111.073	41.9611	0.377779	-1.40439	0.00219392	0.164024	1	12239375	12241751	+	2377	Medtr1g033840	GO:0005515;	-	-	25482643	PPR containing plant-like protein
Medtr8g005175	1700.55	2365.03	1036.07	0.438081	-1.19073	0.00222085	0.164791	8	83317	85681	+	1779	Medtr8g005175	GO:0005509;GO:0005509;GO:0009523;GO:0009523;GO:0009654;GO:0009654;GO:0015979;GO:0015979;GO:0019898;GO:0019898;GO:0005509;GO:0005509;GO:0009523;GO:0009523;GO:0009654;GO:0009654;GO:0015979;GO:0015979;GO:0019898;GO:0019898;	K08901	-	25499987	oxygen-evolving enhancer protein
Medtr7g093490	32.6805	48.4824	16.8786	0.34814	-1.52226	0.00226821	0.167326	7	37173102	37175642	+	998	Medtr7g093490	GO:0005623;GO:0005623;GO:0006662;GO:0006662;GO:0015035;GO:0015035;GO:0045454;GO:0045454;GO:0055114;GO:0005623;GO:0005623;GO:0006662;GO:0006662;GO:0009570;GO:0009570;GO:0015035;GO:0015035;GO:0016491;GO:0045454;GO:0045454;GO:0045454;GO:0055114;GO:0055114;GO:0005623;GO:0005623;GO:0006662;GO:0006662;GO:0015035;GO:0015035;GO:0045454;GO:0045454;GO:0055114;	-	-	11437940	thioredoxin
Medtr5g030950	2668.79	4003.31	1334.27	0.333291	-1.58515	0.00237059	0.172374	5	13264124	13269359	-	2419	Medtr5g030950	GO:0003824;GO:0003824;GO:0004372;GO:0004372;GO:0004372;GO:0006730;GO:0008168;GO:0008168;GO:0016740;GO:0019264;GO:0019264;GO:0030170;GO:0030170;GO:0032259;GO:0035999;GO:0035999;GO:0035999;GO:0035999;	K00600	[EC:2.1.2.1]	11405458	serine hydroxymethyltransferase
Medtr2g101380	53.3122	82.7787	23.8457	0.288066	-1.79553	0.00240122	0.173506	2	43586393	43587731	-	576	Medtr2g101380	GO:0009055;GO:0009055;GO:0009535;GO:0010598;GO:0019252;GO:0019761;GO:0022900;GO:0030003;GO:0051536;GO:0051536;GO:0070838;	-	-	11429907	2Fe-2S iron-sulfur cluster-binding domain protein
Medtr2g101770	333.734	457.226	210.243	0.459823	-1.12085	0.00246369	0.175129	2	43787926	43788721	-	796	Medtr2g101770	GO:0000312;GO:0003735;GO:0003735;GO:0005622;GO:0005840;GO:0005840;GO:0005840;GO:0006412;GO:0006412;GO:0009507;GO:0009534;GO:0009534;GO:0009570;GO:0009570;GO:0009941;GO:0009941;GO:0032544;GO:0032544;	K02961	-	11432384	30S ribosomal protein S17
Medtr3g095560	26.6421	41.9315	11.3527	0.270744	-1.885	0.00250804	0.176796	3	43665579	43666563	-	723	Medtr3g095560	GO:0016020;GO:0016021;GO:0016021;	K19040	[EC:2.3.2.27]	11420711	RING-H2 zinc finger protein
Medtr3g086040	173.83	235.809	111.85	0.474324	-1.07605	0.0025268	0.176961	3	38929857	38932714	+	1294	Medtr3g086040	GO:0009534;GO:0009941;GO:0010027;GO:0042793;	-	-	11442686	plant/F12A21-30 protein, putative
Medtr2g072940	37.3599	54.3097	20.4102	0.375811	-1.41192	0.00255366	0.177546	2	30858113	30865683	-	2434	Medtr2g072940	-	-	-	25487171	PPR containing protein, putative
Medtr6g078930	23.6393	36.301	10.9776	0.302405	-1.72545	0.00267456	0.181963	6	29689102	29697761	-	4483	Medtr6g078930	GO:0005515;GO:0007165;GO:0007165;GO:0043531;GO:0043531;	-	-	11419323	disease resistance protein (TIR-NBS-LRR class), putative
Medtr3g079450	278.336	383.761	172.911	0.45057	-1.15018	0.00276324	0.186994	3	35719843	35725300	+	3109	Medtr3g079450	GO:0005515;GO:0006633;GO:0016165;GO:0016491;GO:0016491;GO:0016491;GO:0016702;GO:0016702;GO:0031408;GO:0031408;GO:0046872;GO:0046872;GO:0046872;GO:0051213;GO:0055114;GO:0055114;GO:0055114;GO:0005515;GO:0006633;GO:0016165;GO:0016491;GO:0016491;GO:0016491;GO:0016702;GO:0016702;GO:0031408;GO:0031408;GO:0046872;GO:0046872;GO:0046872;GO:0051213;GO:0055114;GO:0055114;GO:0055114;	K00454	[EC:1.13.11.12]	11442192	linoleate 13S-lipoxygenase 2-1, related protein
Medtr4g071880	101.12	147.159	55.0809	0.374295	-1.41775	0.00282463	0.190172	4	27261052	27268942	+	1378	Medtr4g071880	GO:0003824;GO:0003824;GO:0004332;GO:0004332;GO:0004332;GO:0006096;GO:0006096;GO:0006096;GO:0016829;	K01623	[EC:4.1.2.13]	11440200	fructose-bisphosphate aldolase class I
Medtr4g108800	509.505	681.053	337.957	0.496227	-1.01093	0.00282519	0.190172	4	45083433	45087458	+	1676	Medtr4g108800	GO:0003824;GO:0003824;GO:0004750;GO:0005975;GO:0005975;GO:0009409;GO:0009507;GO:0009570;GO:0009579;GO:0009624;GO:0009941;GO:0010319;GO:0016853;GO:0016857;GO:0016857;GO:0048046;	K01783	[EC:5.1.3.1]	25493830	ribulose-phosphate 3-epimerase
Medtr7g062140	85.3991	115.166	55.6324	0.483063	-1.04972	0.00287111	0.192243	7	22549588	22554242	-	1378	Medtr7g062140	-	-	-	25498497	NAD(P)-binding rossmann-fold protein
Medtr2g091250	63.0638	93.7169	32.4107	0.345836	-1.53184	0.00290406	0.193429	2	39385795	39392129	-	4046	Medtr2g091250	-	-	-	25487786	frigida-LIKE protein
Medtr1g069155	18.7057	29.5705	7.84101	0.265164	-1.91505	0.0029217	0.194094	1	29728341	29736862	-	2550	Medtr1g069155	GO:0006355;GO:0006355;GO:0046983;GO:0046983;	-	-	25484155	transcription factor
Medtr4g094605	11647.8	16915.3	6380.34	0.377193	-1.40663	0.00293711	0.194101	4	38356454	38357760	+	1307	Medtr4g094605	GO:0009507;GO:0009522;GO:0009522;GO:0009523;GO:0009523;GO:0009535;GO:0009535;GO:0009536;GO:0009579;GO:0009765;GO:0009765;GO:0015979;GO:0016020;GO:0016020;GO:0016020;GO:0016021;GO:0016021;GO:0016168;GO:0016168;GO:0018298;GO:0018298;	K08912	-	25493394	light-harvesting complex I chlorophyll A/B-binding protein
Medtr5g027530	1858.11	3009.89	706.336	0.234672	-2.09128	0.00296362	0.194839	5	11471302	11474793	-	1586	Medtr5g027530	GO:0000165;GO:0005524;GO:0005524;GO:0005975;GO:0005975;GO:0006612;GO:0008974;GO:0008974;GO:0008974;GO:0008974;GO:0009409;GO:0009507;GO:0009535;GO:0009535;GO:0009570;GO:0009570;GO:0009579;GO:0009595;GO:0009637;GO:0009697;GO:0009735;GO:0009862;GO:0009867;GO:0009941;GO:0009941;GO:0010103;GO:0010114;GO:0010200;GO:0010218;GO:0010310;GO:0010319;GO:0010319;GO:0010363;GO:0016020;GO:0016301;GO:0016301;GO:…	K00855	[EC:2.7.1.19]	11412336	phosphoribulokinase
Medtr1g112510	836.552	1213.69	459.409	0.378521	-1.40155	0.0029917	0.195168	1	50928261	50932010	-	1505	Medtr1g112510	GO:0016491;GO:0016616;GO:0016616;GO:0051287;GO:0051287;GO:0055114;GO:0055114;GO:0055114;	K15893	[EC:1.1.1.29]	25485608	D-glycerate dehydrogenase/hydroxypyruvate reductase
Medtr3g075230	233.169	324.563	141.775	0.436818	-1.1949	0.00304436	0.197084	3	34237032	34240288	-	1249	Medtr3g075230	GO:0009570;GO:0009570;GO:0009941;GO:0009941;GO:0010027;GO:0010103;GO:0016787;GO:0016787;GO:0016787;GO:0019252;	-	-	25489510	haloacid dehalogenase-like hydrolase
Medtr3g463080	10.3784	18.0151	2.74165	0.152186	-2.71609	0.00306981	0.198225	3	25250642	25256724	-	2025	Medtr3g463080	GO:0000165;GO:0006612;GO:0009535;GO:0009595;GO:0009697;GO:0009862;GO:0009867;GO:0010200;GO:0010310;GO:0010363;GO:0015293;GO:0015415;GO:0016020;GO:0016021;GO:0016021;GO:0016021;GO:0016787;GO:0030504;GO:0031348;GO:0035435;GO:0042631;GO:0043900;GO:0055085;GO:0055085;GO:0099133;	K08193	-	25490824	sodium-dependent phosphate transporter, putative
Medtr1g115410	140.137	233.601	46.6739	0.199802	-2.32336	0.00314274	0.20089	1	52104806	52107080	+	1039	Medtr1g115410	GO:0005509;GO:0005509;GO:0009507;GO:0009523;GO:0009523;GO:0009535;GO:0009535;GO:0009579;GO:0009654;GO:0009654;GO:0015979;GO:0015979;GO:0019898;GO:0019898;	-	-	25485716	photosystem II reaction center PsbP family protein
Medtr3g070340	508.36	778.718	238.003	0.305634	-1.71013	0.00319526	0.201852	3	31533674	31536436	-	1183	Medtr3g070340	GO:0009507;GO:0009522;GO:0009522;GO:0009523;GO:0009523;GO:0009535;GO:0009535;GO:0009535;GO:0009536;GO:0009579;GO:0009765;GO:0009765;GO:0015979;GO:0016020;GO:0016020;GO:0016020;GO:0016021;GO:0016021;GO:0016168;GO:0016168;GO:0018298;GO:0018298;	K08915	-	11406674	light-harvesting complex I chlorophyll A/B-binding protein
Medtr8g465910	94.7543	139.437	50.0721	0.359103	-1.47753	0.00319756	0.201852	8	23514789	23517772	-	2984	Medtr8g465910	GO:0004839;GO:0016020;GO:0016021;GO:0016567;GO:0016740;GO:0016746;GO:0016874;GO:0016874;GO:0046872;GO:0046872;GO:0046872;	K10666	[EC:2.3.2.27]	25502627	E3 ubiquitin-protein ligase RMA1H1-like protein
Medtr7g112140	384.191	523.998	244.384	0.466384	-1.10041	0.00336882	0.210568	7	46103752	46121563	+	4635	Medtr7g112140	GO:0005515;GO:0005623;GO:0005623;GO:0016787;GO:0016787;GO:0016787;GO:0045454;GO:0045454;GO:0005515;GO:0005623;GO:0005623;GO:0016787;GO:0016787;GO:0016787;GO:0045454;GO:0045454;	-	-	25499658	haloacid dehalogenase-like hydrolase family protein
Medtr0022s0290	86.8857	125.022	48.7498	0.389931	-1.35871	0.00342285	0.211858	scaffold0022	90566	93099	-	2041	Medtr0022s0290	GO:0004497;GO:0004497;GO:0005506;GO:0005506;GO:0016020;GO:0016021;GO:0016021;GO:0016491;GO:0016705;GO:0016705;GO:0020037;GO:0020037;GO:0046872;GO:0055114;GO:0055114;GO:0055114;	K00512	-	25479709	cytochrome P450 family 71 protein
Medtr3g075450	181.119	247.177	115.062	0.465504	-1.10313	0.00349041	0.213437	3	34346003	34350060	-	2664	Medtr3g075450	GO:0010088;GO:0010088;	-	-	25489527	sieve element occlusion protein
Medtr1g088980	153.05	212.334	93.7664	0.441599	-1.17919	0.00357412	0.215873	1	39960538	39969497	-	2370	Medtr1g088980	GO:0004252;GO:0004252;GO:0004252;GO:0005515;GO:0006508;GO:0006508;GO:0006508;GO:0008233;GO:0009507;GO:0009533;GO:0009535;GO:0009570;GO:0009658;GO:0009941;GO:0010206;GO:0030163;	-	-	25484786	DegP protease
Medtr4g067150	173.682	248.282	99.0827	0.399072	-1.32528	0.00358775	0.215873	4	25326110	25327263	-	1154	Medtr4g067150	-	-	-	25492658	tetrapyrrole-binding protein
Medtr4g095430	114.767	160.672	68.8614	0.428585	-1.22235	0.00362617	0.215873	4	39776803	39780967	+	2119	Medtr4g095430	GO:0005515;	-	-	11406233	phototropic-responsive NPH3 family protein
Medtr7g084160	120.912	163.974	77.8495	0.474767	-1.07471	0.00365407	0.215873	7	32448251	32449780	-	780	Medtr7g084160	GO:0010027;GO:0010190;GO:0016020;GO:0016021;GO:0016021;	-	-	11429119	cofactor assembly of complex protein C, putative
Medtr5g088730	63.6931	87.0342	40.3519	0.463633	-1.10895	0.00367129	0.216163	5	38515762	38520992	-	1476	Medtr5g088730	GO:0003333;GO:0003333;GO:0005887;GO:0005887;GO:0009507;GO:0009706;GO:0009706;GO:0009706;GO:0015173;GO:0015173;GO:0015801;GO:0015801;GO:0016020;GO:0016021;	K03834	-	11441955	tyrosine-specific transporter, putative
Medtr2g085125	362.477	496.557	228.397	0.459962	-1.12041	0.00368573	0.216511	2	36138848	36141357	-	1161	Medtr2g085125	-	-	-	25487536	aldo/keto reductase family oxidoreductase
Medtr0590s0010	25.1235	37.8691	12.3778	0.326859	-1.61326	0.00372201	0.217635	scaffold0590	191	2540	+	1080	Medtr0590s0010	GO:0004345;GO:0004345;GO:0006006;GO:0006006;GO:0050661;GO:0050661;GO:0055114;GO:0055114;	K00036	-	25481243	glucose-6-phosphate 1-dehydrogenase
Medtr1g009980	171.529	230.785	112.272	0.486479	-1.03955	0.00392435	0.226991	1	1660245	1664679	+	1075	Medtr1g009980	GO:0009507;GO:0009534;GO:0009534;GO:0009941;GO:0009941;	-	-	25481886	plastid lipid-associated protein
Medtr8g064610	145.096	214.808	75.3833	0.350933	-1.51073	0.00401713	0.229596	8	27119100	27121747	+	1302	Medtr8g064610	GO:0008270;GO:0008270;GO:0016491;GO:0016491;GO:0016491;GO:0032440;GO:0055114;GO:0055114;GO:0055114;	K18980	[EC:1.3.1.105]	25501340	zinc-binding dehydrogenase family oxidoreductase
Medtr4g088920	72.0019	99.2711	44.7327	0.450611	-1.15004	0.00409819	0.232142	4	35512675	35517782	-	2742	Medtr4g088920	GO:0004519;GO:0004519;GO:0004519;GO:0005524;GO:0005524;GO:0006298;GO:0006298;GO:0016787;GO:0016887;GO:0016887;GO:0030983;GO:0030983;GO:0045005;GO:0045910;GO:0045910;GO:0090305;	K07456	-	25493177	DNA mismatch repair protein MutS2
Medtr2g049780	57.7928	79.4109	36.1748	0.455539	-1.13435	0.00417882	0.235716	2	22363786	22364848	-	1063	Medtr2g049780	GO:0003690;GO:0003690;GO:0006355;GO:0006355;GO:0009507;GO:0042646;GO:0071472;	K15032	-	11415133	transcription termination factor family protein
Medtr1g015530	59.2842	89.3015	29.267	0.327733	-1.60941	0.00428724	0.240702	1	3911308	3919054	+	4004	Medtr1g015530	GO:0000166;GO:0001558;GO:0004672;GO:0004672;GO:0004674;GO:0004674;GO:0005515;GO:0005524;GO:0005524;GO:0005524;GO:0006468;GO:0006468;GO:0009944;GO:0009965;GO:0010075;GO:0010103;GO:0010148;GO:0016020;GO:0016021;GO:0016021;GO:0016301;GO:0016310;GO:0016740;GO:0019199;GO:0030155;GO:0031540;GO:0048281;GO:0051302;GO:2000027;GO:0000166;GO:0004672;GO:0004672;GO:0004674;GO:0004674;GO:0005515;GO:0005524;GO:…	K20718	[EC:2.7.11.1]	11428771	LRR receptor-like kinase family protein
Medtr2g105090	132.106	190.031	74.1809	0.390363	-1.35711	0.00431362	0.240838	2	45315360	45318009	-	1357	Medtr2g105090	-	-	-	25487982	DS12 from 2D-PAGE of leaf protein, putative
Medtr7g085490	69.3889	111.011	27.7665	0.250124	-1.99929	0.00431813	0.240838	7	33120961	33122962	-	1367	Medtr7g085490	GO:0003824;GO:0003824;GO:0005975;GO:0005975;GO:0009535;GO:0009773;GO:0010598;GO:0030246;GO:0030246;	-	-	11442672	NDH-dependent cyclic electron flow protein, putative
Medtr8g023790	1941.22	2753.39	1129.06	0.410061	-1.28609	0.00436739	0.242592	8	8650676	8653598	-	1283	Medtr8g023790	GO:0009507;GO:0009522;GO:0009522;GO:0009523;GO:0009523;GO:0009535;GO:0009535;GO:0009536;GO:0009579;GO:0009765;GO:0009765;GO:0015979;GO:0016020;GO:0016020;GO:0016020;GO:0016021;GO:0016021;GO:0016168;GO:0016168;GO:0018298;GO:0018298;	K08908	-	25500581	light-harvesting complex I chlorophyll A/B-binding protein
Medtr7g080530	396.364	620.984	171.745	0.276569	-1.85429	0.00438812	0.243138	7	30651313	30655363	+	1406	Medtr7g080530	GO:0008967;GO:0016311;GO:0016787;GO:0016791;GO:0016791;GO:0008967;GO:0008967;GO:0016311;GO:0016787;GO:0016791;GO:0016791;	K19269	-	11436721	phosphoglycolate phosphatase-like protein
Medtr7g114590	20.1344	31.0228	9.24613	0.298043	-1.74641	0.00444636	0.244762	7	47318816	47319367	-	552	Medtr7g114590	GO:0005506;GO:0005506;GO:0009507;GO:0009535;GO:0009535;GO:0009535;GO:0009965;GO:0010207;GO:0010207;GO:0016020;GO:0016021;GO:0016021;GO:0046872;GO:0046872;	-	-	11434194	rubredoxin-like protein
Medtr3g086440	27.4775	41.5283	13.4267	0.323315	-1.62899	0.00469185	0.256606	3	39160150	39164259	+	1856	Medtr3g086440	GO:0016020;GO:0016021;GO:0016021;GO:0016021;GO:0055085;GO:0055085;	-	-	11411485	zinc induced facilitator-like protein
Medtr3g028150	23.0372	36.3845	9.68984	0.266318	-1.90878	0.00488151	0.264697	3	8912307	8913228	-	922	Medtr3g028150	GO:0005509;GO:0005509;GO:0009523;GO:0009523;GO:0009543;GO:0009654;GO:0009654;GO:0015979;GO:0015979;GO:0019898;GO:0019898;	-	-	11421951	thylakoid lumenal 19 kDa protein
Medtr5g098785	228.383	334.518	122.248	0.365445	-1.45227	0.0051134	0.270904	5	43258628	43261216	-	1252	Medtr5g098785	GO:0009507;GO:0009522;GO:0009522;GO:0009523;GO:0009523;GO:0009535;GO:0009535;GO:0009536;GO:0009579;GO:0009765;GO:0009765;GO:0015979;GO:0016020;GO:0016020;GO:0016020;GO:0016021;GO:0016021;GO:0016168;GO:0016168;GO:0018298;GO:0018298;	K08909	-	25494983	light-harvesting complex I chlorophyll A/B-binding protein
Medtr8g088420	217.732	303.209	132.254	0.436181	-1.197	0.00512685	0.27105	8	36643142	36646685	+	1297	Medtr8g088420	GO:0005515;GO:0009535;GO:0009570;GO:0009941;GO:0005515;	-	-	11416751	tyrosine phosphatase, putative
Medtr1g081850	77.1824	103.259	51.1061	0.494933	-1.0147	0.00524753	0.273443	1	36451154	36453660	+	2507	Medtr1g081850	-	-	-	25484667	hypothetical protein
Medtr4g124790	190.084	267.998	112.17	0.418546	-1.25654	0.00528864	0.274458	4	51719993	51723048	+	1029	Medtr4g124790	GO:0004601;GO:0004601;GO:0005623;GO:0005623;GO:0016209;GO:0016209;GO:0016491;GO:0016491;GO:0016491;GO:0045454;GO:0045454;GO:0051920;GO:0055114;GO:0055114;GO:0055114;GO:0098869;	K03564	[EC:1.11.1.15]	11441719	thioredoxin-dependent peroxidase
Medtr0176s0050	37.2697	56.5732	17.9662	0.317575	-1.65483	0.00537362	0.277732	scaffold0176	20303	25712	-	3525	Medtr0176s0050	GO:0005515;	-	-	25480554	hypothetical protein
Medtr3g111700	20.3492	34.1402	6.55814	0.192094	-2.38011	0.00551814	0.283469	3	52237819	52242805	-	2285	Medtr3g111700	-	-	-	25490179	heat shock protein-binding protein, putative
Medtr1g090683	37.8389	53.8264	21.8513	0.40596	-1.30059	0.00576199	0.291478	1	40643432	40646016	-	2480	Medtr1g090683	GO:0016020;GO:0016021;GO:0016021;	-	-	25484815	DUF594 family protein
Medtr8g087460	11.7068	19.2883	4.12521	0.213871	-2.22519	0.00576592	0.291478	8	36150681	36151957	+	1277	Medtr8g087460	GO:0016020;GO:0016021;GO:0016021;	-	-	11415872	fasciclin domain protein
Medtr1g063850	56.3204	87.6938	24.947	0.284478	-1.81361	0.00586787	0.294869	1	28023352	28030240	-	2085	Medtr1g063850	GO:0003700;GO:0003700;GO:0006352;GO:0006352;GO:0006355;GO:0006355;	-	-	11434136	RNA polymerase sigma factor
Medtr1g084200	12.3266	23.2481	1.40512	0.0604403	-4.04835	0.00594072	0.296767	1	37614251	37615143	+	893	Medtr1g084200	-	-	-	25484703	plant/F25P12-18 protein
Medtr3g086230	862.076	1201.25	522.898	0.435293	-1.19994	0.00595567	0.296929	3	39016812	39017750	-	939	Medtr3g086230	GO:0009523;GO:0009523;GO:0009533;GO:0009535;GO:0009657;GO:0015979;GO:0015979;GO:0016020;GO:0016021;GO:0016021;GO:0016021;GO:0019344;GO:0030145;GO:0030145;GO:0035304;	K02723	-	11416110	photosystem II core complex family psbY protein
Medtr5g015880	53.627	75.61	31.6441	0.418517	-1.25664	0.00596876	0.296998	5	5586820	5588559	+	1564	Medtr5g015880	-	-	-	11421111	lateral organ boundaries (LOB) domain protein
Medtr6g022830	58.6	79.5668	37.6331	0.472975	-1.08017	0.00605086	0.298898	6	7994631	7998187	-	3004	Medtr6g022830	GO:0005515;	-	-	25495711	ankyrin repeat protein
Medtr5g095880	9.93781	19.5238	0.351831	0.0180206	-5.79421	0.00622033	0.30379	5	41918470	41923776	+	2157	Medtr5g095880	GO:0003824;GO:0003824;GO:0006281;GO:0006281;GO:0051539;GO:0051539;	-	-	11436132	HhH-GPD base excision DNA repair family protein
Medtr4g086020	2449.09	3382.73	1515.45	0.447996	-1.15844	0.00622371	0.30379	4	33643564	33646615	+	2172	Medtr4g086020	GO:0009570;GO:0016491;GO:0016491;GO:0016491;GO:0019344;GO:0020037;GO:0020037;GO:0048307;GO:0048307;GO:0050421;GO:0051536;GO:0051536;GO:0055114;GO:0055114;GO:0055114;	K00366	[EC:1.7.7.1]	11445727	ferredoxin-nitrite reductase
Medtr1g090290	33.7226	48.2344	19.2109	0.398282	-1.32814	0.00622496	0.30379	1	40444472	40445065	-	594	Medtr1g090290	GO:0003677;GO:0003677;GO:0003677;GO:0003700;GO:0003700;GO:0005634;GO:0005634;GO:0006351;GO:0006355;GO:0006355;	-	-	11422933	ethylene response factor
Medtr6g016790	53.8218	74.5465	33.0972	0.443981	-1.17143	0.0063048	0.305512	6	6460690	6463030	+	2341	Medtr6g016790	GO:0008152;GO:0016787;GO:0016798;GO:0042973;GO:0052861;GO:0052861;GO:0052862;	K01180	[EC:3.2.1.6]	25495544	glycoside hydrolase family 81 protein
Medtr8g022950	10.7007	21.0517	0.349628	0.016608	-5.91197	0.00636942	0.306549	8	8154996	8156189	-	391	Medtr8g022950	-	-	-	11445922	DUF581 family protein
Medtr6g038750	60.9802	82.3399	39.6206	0.481183	-1.05534	0.00638437	0.306549	6	13897784	13909094	-	2190	Medtr6g038750	GO:0004672;GO:0004672;GO:0005524;GO:0005524;GO:0006468;GO:0006468;GO:0010287;GO:0015434;GO:0016301;GO:0016310;GO:0016787;GO:0070574;	K08869	-	25496228	unusual kinase, putative
Medtr2g064495	10.4734	17.4842	3.46246	0.198033	-2.33619	0.00639022	0.306549	2	27356105	27359498	-	1831	Medtr2g064495	GO:0016740;GO:0016747;GO:0016747;	K13065	[EC:2.3.1.133]	25486922	shikimate/quinate hydroxycinnamoyltransferase
Medtr1g110870	377.454	638.543	116.365	0.182235	-2.45613	0.0064297	0.307344	1	50054285	50056406	-	1740	Medtr1g110870	GO:0005515;GO:0005634;GO:0005634;GO:0008270;GO:0008270;	-	-	25485498	zinc finger constans-like protein
Medtr8g006755	71.4249	95.3135	47.5363	0.498736	-1.00365	0.00645664	0.307344	8	920971	928573	+	1413	Medtr8g006755	GO:0000413;GO:0003755;GO:0003755;GO:0016853;	-	-	25500033	FKBP-type peptidyl-prolyl cis-trans isomerase
Medtr3g103960	18.4989	31.815	5.18291	0.162908	-2.61787	0.0065529	0.310287	3	47893265	47895263	+	1999	Medtr3g103960	GO:0003677;GO:0003723;GO:0003727;GO:0005737;GO:0046872;GO:0046872;GO:0046872;GO:0061157;	K23048	-	11430634	zinc finger CCCH domain protein
Medtr7g092910	47.779	65.7804	29.7776	0.452682	-1.14343	0.00668539	0.31244	7	36882481	36887881	-	2372	Medtr7g092910	GO:0004672;GO:0004672;GO:0005515;GO:0005524;GO:0005524;GO:0006468;GO:0006468;GO:0016020;GO:0016021;GO:0016021;GO:0016301;GO:0016310;	-	-	11428201	strubbelig-receptor family protein
Medtr1g022445	198.791	268.288	129.294	0.481923	-1.05312	0.00683197	0.317537	1	7164068	7167077	-	1242	Medtr1g022445	GO:0003824;GO:0003824;GO:0009718;GO:0016491;GO:0042406;GO:0045552;GO:0045552;GO:0050662;GO:0050662;GO:0055114;	K13082	-	25482169	dihydroflavonol 4-reductase
Medtr3g107397	8.60008	15.467	1.73319	0.112058	-3.15769	0.00709342	0.32306	3	49546235	49547475	-	431	Medtr3g107397	-	-	-	25490029	chaperon protein P13.9, putative
Medtr2g013780	15.8084	24.6681	6.94867	0.281687	-1.82784	0.00711452	0.32306	2	3774490	3776623	+	1209	Medtr2g013780	-	-	-	11423944	DUF506 family protein
Medtr7g106440	80.6881	108.712	52.6638	0.484433	-1.04563	0.0071567	0.323736	7	43322087	43324307	-	1376	Medtr7g106440	GO:0003676;GO:0003676;GO:0003723;GO:0003723;GO:0019013;	K11294	-	25499498	33 kDa ribonucleoprotein
Medtr5g011220	5.15253	9.60139	0.703662	0.0732876	-3.77029	0.00724312	0.325325	5	3186523	3189399	-	1240	Medtr5g011220	GO:0009535;GO:0009535;GO:0009773;GO:0009773;GO:0016020;GO:0016021;GO:0016021;GO:0016730;GO:0016730;	-	-	11436266	PGR5-like protein 1A
Medtr8g027685	724.52	1049.55	399.492	0.380632	-1.39353	0.00726945	0.325356	8	9966029	9981153	-	6658	Medtr8g027685	GO:0003743;GO:0003743;GO:0005515;GO:0005634;GO:0005634;GO:0005829;GO:0005829;GO:0006413;	K03255	-	25500695	eukaryotic translation initiation factor 3 subunit
Medtr8g018735	340.284	506.519	174.049	0.343618	-1.54112	0.00738679	0.329313	8	6455504	6459438	-	2972	Medtr8g018735	GO:0005515;GO:0006633;GO:0016165;GO:0016491;GO:0016491;GO:0016491;GO:0016702;GO:0016702;GO:0031408;GO:0031408;GO:0046872;GO:0046872;GO:0046872;GO:0051213;GO:0055114;GO:0055114;GO:0055114;GO:0005515;GO:0006633;GO:0016165;GO:0016491;GO:0016491;GO:0016491;GO:0016702;GO:0016702;GO:0031408;GO:0031408;GO:0046872;GO:0046872;GO:0046872;GO:0051213;GO:0055114;GO:0055114;GO:0055114;	K15718	[EC:1.13.11.58]	25500504	seed linoleate 9S-lipoxygenase
Medtr4g051290	29.2033	42.0469	16.3597	0.389082	-1.36186	0.00739959	0.329313	4	18303995	18305270	+	1276	Medtr4g051290	GO:0005506;GO:0005506;GO:0009055;GO:0009055;GO:0009055;GO:0009523;GO:0009523;GO:0009536;GO:0009536;GO:0009536;GO:0009579;GO:0009635;GO:0009635;GO:0009635;GO:0009772;GO:0009772;GO:0015979;GO:0016020;GO:0016021;GO:0016021;GO:0016168;GO:0016168;GO:0016491;GO:0016682;GO:0016682;GO:0018298;GO:0018298;GO:0019684;GO:0019684;GO:0042651;GO:0042651;GO:0045156;GO:0045156;GO:0046872;GO:0055114;	K02703	[EC:1.10.3.9]	11445226	photosystem II Q(B) protein
Medtr7g011850	150.142	206.189	94.0955	0.456355	-1.13177	0.00746123	0.329313	7	3281753	3284321	+	1816	Medtr7g011850	-	K07735	-	11417841	plant/MXO21-9 protein
Medtr1g016360	35.1347	49.6063	20.663	0.416541	-1.26347	0.00752186	0.329313	1	4337804	4341109	+	2400	Medtr1g016360	GO:0016020;GO:0016021;GO:0016021;GO:0016020;GO:0016021;GO:0016021;GO:0016020;GO:0016021;GO:0016021;	-	-	11417176	DUF1230 family protein
Medtr7g088880	76.1341	110.838	41.4307	0.373796	-1.41968	0.00775394	0.334414	7	34696408	34698124	+	985	Medtr7g088880	GO:0005509;GO:0005509;GO:0009507;GO:0009523;GO:0009523;GO:0009534;GO:0009543;GO:0009570;GO:0009570;GO:0009579;GO:0009654;GO:0009654;GO:0009965;GO:0010027;GO:0015979;GO:0015979;GO:0016491;GO:0019898;GO:0019898;GO:0031977;GO:0055114;	-	-	11417401	thylakoid lumenal 29.8 kDa protein
Medtr3g005060	114.735	174.906	54.5641	0.311962	-1.68056	0.00777251	0.334414	3	25745	28726	-	1124	Medtr3g005060	GO:0016787;GO:0016787;GO:0016787;GO:0008806;GO:0016787;GO:0016787;GO:0016787;	K01061	[EC:3.1.1.45]	11430036	dienelactone hydrolase family protein
Medtr5g022350	50.2947	68.677	31.9124	0.464673	-1.10571	0.00792026	0.338563	5	8809674	8811661	+	1869	Medtr5g022350	GO:0016020;GO:0016021;GO:0016021;GO:0016020;GO:0016021;GO:0016021;	-	-	11428451	pathogenesis-related thaumatin family protein
Medtr3g088630	18.2863	28.6506	7.92188	0.276499	-1.85465	0.00793607	0.338563	3	40027258	40031137	-	1319	Medtr3g088630	GO:0000160;GO:0000160;GO:0005622;	K14492	-	11427812	two-component response regulator ARR3-like protein
Medtr3g076660	1317.66	1791.08	844.241	0.471358	-1.08511	0.00794312	0.338563	3	34457933	34460232	+	2065	Medtr3g076660	GO:0000038;GO:0000166;GO:0003746;GO:0003746;GO:0003746;GO:0003924;GO:0003924;GO:0003924;GO:0005525;GO:0005525;GO:0005525;GO:0005622;GO:0006414;GO:0006414;GO:0006414;GO:0009295;GO:0009535;GO:0009570;GO:0009941;GO:0016787;GO:0042335;	K02358	-	11412641	elongation factor Tu protein
Medtr1g041890	41.6963	57.8985	25.4941	0.440324	-1.18336	0.00796664	0.338563	1	20203032	20209058	-	1647	Medtr1g041890	GO:0003730;GO:0003730;GO:0003730;GO:0003747;GO:0003747;GO:0006415;GO:0006415;GO:0009507;GO:0009570;GO:0009570;GO:0009570;GO:0009658;GO:0009658;GO:0009658;GO:0010190;GO:0016556;GO:0043488;GO:0043488;GO:0043565;GO:0043565;GO:0048255;	-	-	11430784	peptide chain release factor, putative
Medtr3g105050	19.1852	28.9958	9.37451	0.323306	-1.62903	0.00802441	0.338563	3	48439376	48442946	-	957	Medtr3g105050	GO:0009535;	-	-	11433497	hypothetical protein
Medtr3g088645	144.813	197.329	92.2976	0.467735	-1.09624	0.00805653	0.338563	3	40380356	40381979	+	1023	Medtr3g088645	GO:0016655;GO:0016655;GO:0055114;GO:0055114;	-	-	25489711	NAD(P)H-quinone oxidoreductase subunit M
Medtr3g078613	57.2932	77.2255	37.3609	0.483789	-1.04755	0.00819794	0.340743	3	35427921	35430565	+	1160	Medtr3g078613	GO:0000160;GO:0000160;GO:0005622;GO:0000160;GO:0000160;GO:0005622;	K14492	-	25489576	two-component response regulator ARR3-like protein
Medtr3g057800	25.5083	37.308	13.7087	0.367447	-1.44439	0.00830417	0.343216	3	22854929	22858976	-	1916	Medtr3g057800	GO:0004497;GO:0004497;GO:0005506;GO:0005506;GO:0016020;GO:0016021;GO:0016021;GO:0016491;GO:0016705;GO:0016705;GO:0020037;GO:0020037;GO:0046872;GO:0055114;GO:0055114;GO:0055114;	-	-	11440532	cytochrome P450 family 71 protein
Medtr4g103330	116.118	169.336	62.9006	0.371455	-1.42874	0.00835267	0.344449	4	42690810	42691990	+	1181	Medtr4g103330	GO:0000165;GO:0006612;GO:0009535;GO:0009595;GO:0009697;GO:0009862;GO:0009867;GO:0009941;GO:0010027;GO:0010200;GO:0010287;GO:0010310;GO:0010319;GO:0010363;GO:0015986;GO:0015986;GO:0016020;GO:0016020;GO:0016787;GO:0019252;GO:0019760;GO:0031348;GO:0043900;GO:0046933;GO:0046933;GO:0099132;	K02113	-	11407939	F0F1-type ATP synthase, delta subunit
Medtr3g105100	33.4571	47.2746	19.6396	0.415437	-1.2673	0.00876741	0.355639	3	48454215	48456403	-	1039	Medtr3g105100	GO:0016020;GO:0016020;	K02221	-	11442240	YGGT family protein
Medtr4g107630	122.979	169.326	76.631	0.452564	-1.1438	0.00891582	0.358001	4	44583772	44586598	+	1646	Medtr4g107630	GO:0016020;GO:0016021;GO:0016021;	-	-	11439136	integral membrane HPP family protein
Medtr2g087890	44.1445	60.5688	27.7203	0.457666	-1.12763	0.00897804	0.358232	2	37001502	37006215	+	1443	Medtr2g087890	GO:0004497;GO:0004497;GO:0005506;GO:0005506;GO:0006569;GO:0009684;GO:0009941;GO:0016705;GO:0016705;GO:0016829;GO:0016829;GO:0020037;GO:0020037;GO:0046872;GO:0055114;GO:0055114;	K10528	[EC:4.1.2.-]	11414968	fatty acid hydroperoxide lyase
Medtr1g060550	198.867	296.59	101.143	0.341021	-1.55207	0.00899549	0.358365	1	26347876	26349522	-	1647	Medtr1g060550	GO:0005506;GO:0005506;GO:0016020;GO:0016021;GO:0016021;GO:0016705;GO:0016705;GO:0020037;GO:0020037;GO:0055114;GO:0055114;	K20624	[EC:1.14.14.49]	25483856	cytochrome P450 family 94 protein
Medtr1g074020	4.40345	8.47222	0.334682	0.0395034	-4.66188	0.00922698	0.363886	1	32893182	32896443	+	1299	Medtr1g074020	GO:0016020;GO:0016020;GO:0016020;GO:0016021;GO:0016021;GO:0016021;GO:0022857;GO:0022857;GO:0055085;	-	-	25484411	nodulin MtN21/EamA-like transporter family protein
Medtr1g018320	62.6372	90.2492	35.0252	0.388094	-1.36552	0.00926312	0.363886	1	5202292	5203901	+	1521	Medtr1g018320	GO:0009805;GO:0010223;GO:0010223;GO:0015824;GO:0016787;GO:1901601;GO:1901601;GO:1902348;GO:1902348;	-	-	11431072	sigma factor sigb regulation rsbq-like protein
Medtr4g079750	32.5877	47.5091	17.6663	0.371851	-1.4272	0.00947584	0.367014	4	30869473	30872686	-	1291	Medtr4g079750	GO:0008168;	-	-	11418346	CMV 1a interacting protein
Medtr0024s0260	15.2851	23.7138	6.85632	0.289128	-1.79022	0.00995201	0.379208	scaffold0024	113389	116979	+	2290	Medtr0024s0260	GO:0004252;GO:0004252;GO:0006508;GO:0008233;GO:0016020;GO:0016021;GO:0016021;GO:0016021;GO:0016787;GO:0004252;GO:0004252;GO:0006508;GO:0016020;GO:0016021;GO:0016021;GO:0016021;	-	-	25479746	S54 family peptidase
Medtr1g089620	4.13876	7.92789	0.349628	0.0441011	-4.50304	0.00997254	0.37942	1	40135799	40142943	+	5394	Medtr1g089620	-	-	-	25484797	hypothetical protein
Medtr3g080840	27.7462	43.7281	11.7643	0.269034	-1.89414	0.0100052	0.379535	3	36585417	36588592	-	1070	Medtr3g080840	GO:0016853;	-	-	11426999	D27 family protein, putative
Medtr1g094160	39.3134	54.6279	23.9988	0.439315	-1.18667	0.0102321	0.384138	1	42341392	42344245	+	803	Medtr1g094160	GO:0009555;	-	-	25484922	DUF3783 domain protein
Medtr3g068150	10.4945	17.2007	3.78833	0.220243	-2.18283	0.0102682	0.384899	3	30781995	30786153	-	950	Medtr3g068150	GO:0009535;GO:0009543;	-	-	25489345	thylakoid lumenal 15 kDa protein
Medtr6g014170	4.08889	7.82594	0.351831	0.044957	-4.47531	0.010298	0.385399	6	4563505	4565634	-	1631	Medtr6g014170	GO:0016740;GO:0016757;GO:0016758;GO:0016758;	-	-	11413940	UDP-glucosyltransferase family protein
Medtr0113s0040	96.4822	128.653	64.3112	0.49988	-1.00034	0.0103882	0.387109	scaffold0113	7345	10916	-	1692	Medtr0113s0040	GO:0005515;	-	-	25480331	F-box protein
Medtr2g080040	41.5045	57.0545	25.9545	0.454907	-1.13636	0.0106044	0.389644	2	33775948	33779312	-	1675	Medtr2g080040	GO:0016021;GO:0016021;	K13348	-	25487391	peroxisomal membrane 22 kDa (Mpv17/PMP22) family protein
Medtr1g045520	21.3127	31.5089	11.1165	0.352805	-1.50306	0.0106131	0.389644	1	17078248	17082200	+	1431	Medtr1g045520	GO:0016020;GO:0016021;GO:0016021;	-	-	11424294	transmembrane protein, putative
Medtr1g087030	245.256	411.581	78.9306	0.191774	-2.38252	0.0106436	0.389644	1	38959375	38960094	+	720	Medtr1g087030	-	-	-	11412272	calvin cycle protein CP12-1
Medtr1g116120	622.206	872.283	372.13	0.426616	-1.22899	0.0106695	0.389644	5	24641837	24645325	-	2208	Medtr1g116120	GO:0003824;GO:0003824;GO:0004802;GO:0004802;GO:0004802;GO:0016740;	K00615	[EC:2.2.1.1]	11423341	plastid transketolase
Medtr4g069080	67.0934	97.0634	37.1234	0.382466	-1.3866	0.0106836	0.389644	4	25949059	25953479	-	1912	Medtr4g069080	GO:0016020;GO:0016021;GO:0016021;	K07399	-	25492715	cytochrome C biogenesis protein Ccs1
Medtr7g086340	53.6797	76.393	30.9664	0.405356	-1.30274	0.0107886	0.392799	7	33494216	33495828	-	1613	Medtr7g086340	GO:0046872;GO:0046872;	-	-	11438901	dehydrin
Medtr2g022350	19.8648	29.6795	10.05	0.338618	-1.56227	0.0113206	0.408653	2	7710507	7712034	+	1528	Medtr2g022350	GO:0004190;GO:0004190;GO:0006508;GO:0006508;GO:0016020;GO:0016021;	-	-	25486094	extracellular dermal glycoprotein
Medtr2g006290	53.7156	72.453	34.9782	0.482771	-1.05059	0.0115274	0.412595	2	525142	526002	-	861	Medtr2g006290	GO:0009055;GO:0009055;GO:0009507;GO:0009507;GO:0009536;GO:0022900;GO:0022900;GO:0046872;GO:0046872;GO:0051536;GO:0051536;GO:0051536;GO:0051537;GO:0051537;GO:0051537;GO:0055114;	K02639	-	11423564	2Fe-2S ferredoxin superfamily protein
Medtr2g008430	7.46021	12.8459	2.07448	0.16149	-2.63049	0.011758	0.417902	2	1471885	1475400	+	1323	Medtr2g008430	GO:0003824;GO:0003824;GO:0008483;GO:0008483;GO:0008483;GO:0008483;GO:0009058;GO:0009058;GO:0009536;GO:0009536;GO:0009627;GO:0009693;GO:0009862;GO:0009862;GO:0009862;GO:0010150;GO:0010150;GO:0010285;GO:0016740;GO:0030170;GO:0030170;GO:0030170;GO:0042742;GO:0042742;GO:0062034;GO:0062034;GO:0062045;GO:0062045;	K10206	[EC:2.6.1.83]	11434331	LL-diaminopimelate aminotransferase
Medtr2g034140	21.3495	34.3541	8.34498	0.242911	-2.0415	0.0118819	0.420533	2	13034406	13037142	-	1301	Medtr2g034140	-	-	-	11412481	iron-sulfur-binding 4Fe-4S ferredoxin
Medtr6g008800	49.7045	67.0238	32.3852	0.48319	-1.04934	0.0118983	0.420533	6	2429240	2441152	+	4219	Medtr6g008800	GO:0000166;GO:0005524;GO:0005524;GO:0005524;GO:0006855;GO:0008559;GO:0016020;GO:0016021;GO:0016021;GO:0016021;GO:0016787;GO:0016887;GO:0016887;GO:0042626;GO:0042626;GO:0042908;GO:0055085;GO:0055085;	K05658	[EC:7.6.2.2]	11425328	ABC transporter B family protein
Medtr1g059660	33.0189	49.0883	16.9494	0.345284	-1.53414	0.012005	0.423716	1	25939767	25941449	+	890	Medtr1g059660	GO:0009507;GO:0009535;GO:0009570;	-	-	25483798	hypothetical protein
Medtr7g113530	54.9076	73.3414	36.4739	0.497317	-1.00776	0.0120344	0.424161	7	46784228	46786981	-	1770	Medtr7g113530	GO:0009507;	-	-	11423164	chaperone protein DnaJ
Medtr6g033320	500.475	667.356	333.594	0.499874	-1.00036	0.0121311	0.424503	6	10650230	10652924	-	1079	Medtr6g033320	GO:0009507;GO:0009522;GO:0009522;GO:0009523;GO:0009523;GO:0009535;GO:0009535;GO:0009536;GO:0009579;GO:0009765;GO:0009765;GO:0015979;GO:0016020;GO:0016020;GO:0016020;GO:0016021;GO:0016021;GO:0016168;GO:0016168;GO:0018298;GO:0018298;	K08907	-	25495910	light-harvesting complex I chlorophyll A/B-binding protein
Medtr3g103300	57.8235	77.1092	38.5379	0.499783	-1.00063	0.0121419	0.424503	3	47642978	47645963	+	1521	Medtr3g103300	GO:0004607;GO:0006629;GO:0006629;GO:0008374;GO:0008374;GO:0016740;GO:0016746;	K06129	[EC:3.1.1.5]	25489980	lecithin:cholesterol acyltransferase family protein
Medtr5g090780	38.0763	52.6389	23.5137	0.446698	-1.16263	0.0121553	0.424503	5	39516910	39526617	-	1324	Medtr5g090780	GO:0004310;GO:0004310;GO:0006696;GO:0006696;GO:0009058;GO:0016020;GO:0016021;GO:0016021;GO:0016740;GO:0016740;GO:0016765;GO:0016765;GO:0016767;GO:0051996;GO:0051996;	K02291	[EC:2.5.1.32]	11426744	squalene/phytoene synthase
Medtr6g018310	1524.31	2491.84	556.786	0.223443	-2.16202	0.0124839	0.432204	6	7009014	7010704	+	991	Medtr6g018310	GO:0004497;GO:0004497;GO:0009507;GO:0009507;GO:0009536;GO:0009853;GO:0009853;GO:0009853;GO:0015977;GO:0015977;GO:0015979;GO:0015979;GO:0016491;GO:0016829;GO:0016984;GO:0016984;GO:0055114;	K01602	[EC:4.1.1.39]	11416005	ribulose bisphosphate carboxylase small chain
Medtr7g026030	18.5767	27.8834	9.26989	0.332451	-1.58879	0.0126454	0.436341	7	8608845	8610855	-	1884	Medtr7g026030	GO:0000166;GO:0005524;GO:0005524;	K03283	-	11440351	heat shock cognate 70 kDa protein
Medtr1g018810	83.3625	119.802	46.9233	0.391675	-1.35227	0.0126676	0.436341	1	5530162	5532703	+	1129	Medtr1g018810	-	-	-	11414521	transcription factor-like protein
Medtr7g066120	235.995	358.434	113.557	0.316814	-1.65829	0.0126722	0.436341	7	24045829	24049068	+	1407	Medtr7g066120	GO:0005975;GO:0005975;GO:0005975;GO:0005985;GO:0005985;GO:0009409;GO:0009409;GO:0009507;GO:0009570;GO:0009570;GO:0009735;GO:0009735;GO:0009773;GO:0009773;GO:0010319;GO:0010319;GO:0015979;GO:0016311;GO:0016787;GO:0016791;GO:0016791;GO:0030388;GO:0030388;GO:0042132;GO:0042132;GO:0042132;GO:0042132;GO:0042578;GO:0042578;GO:0048046;GO:0048046;	K03841	[EC:3.1.3.11]	25498664	fructose-1,6-bisphosphatase
Medtr4g062480	53.7023	71.7808	35.6237	0.496285	-1.01076	0.0128889	0.44081	4	23215388	23218638	-	3251	Medtr4g062480	GO:0005515;	-	-	25492469	PPR containing plant-like protein
Medtr5g098530	4.68551	8.66735	0.703662	0.0811854	-3.62264	0.0130117	0.443991	5	43142967	43143661	-	495	Medtr5g098530	GO:0016020;GO:0016021;GO:0016021;	-	-	11419653	transmembrane protein, putative
Medtr2g026160	10.23	16.6457	3.81429	0.229145	-2.12567	0.0131785	0.446298	2	9451635	9456189	-	2140	Medtr2g026160	GO:0005215;GO:0005215;GO:0008643;GO:0016020;GO:0016020;GO:0016020;GO:0016021;GO:0016021;GO:0016021;GO:0022857;GO:0022857;GO:0055085;GO:0055085;	K08150	-	11416648	inositol transporter, putative
Medtr1g086180	9.14299	15.1648	3.12117	0.205816	-2.28057	0.0131871	0.446298	1	38577373	38581265	-	3893	Medtr1g086180	GO:0003677;GO:0003677;	-	-	11417434	MYB family transcription factor
Medtr2g064650	1588	2119.51	1056.5	0.498463	-1.00444	0.0134877	0.452151	2	29312795	29315474	-	1079	Medtr2g064650	GO:0009523;GO:0009523;GO:0009535;GO:0009637;GO:0009644;GO:0009654;GO:0009654;GO:0010114;GO:0010218;GO:0015979;GO:0015979;GO:0016020;GO:0016021;GO:0016021;GO:0019344;GO:0042651;GO:0042651;GO:0009523;GO:0009523;GO:0009654;GO:0009654;GO:0015979;GO:0015979;GO:0042651;GO:0042651;	K03541	-	11446770	photosystem II 10 kDa proteinPsbR protein
Medtr4g092690	510.327	780.843	239.811	0.307119	-1.70313	0.0135206	0.452654	4	36762718	36765660	+	1455	Medtr4g092690	GO:0003824;GO:0003824;GO:0005773;GO:0005773;GO:0005777;GO:0005777;GO:0005975;GO:0005975;GO:0006099;GO:0006099;GO:0009507;GO:0009735;GO:0009735;GO:0009941;GO:0009941;GO:0016491;GO:0016491;GO:0016491;GO:0016616;GO:0016616;GO:0019752;GO:0019752;GO:0030060;GO:0030060;GO:0030060;GO:0031998;GO:0031998;GO:0044262;GO:0048046;GO:0048046;GO:0055114;GO:0055114;GO:0055114;GO:0080093;GO:0080093;	K00026	[EC:1.1.1.37]	11405683	glyoxysomal malate dehydrogenase
Medtr6g464050	7.25569	12.4861	2.02524	0.162199	-2.62416	0.0139702	0.463428	6	22281147	22290131	-	7023	Medtr6g464050	GO:0004190;GO:0004190;GO:0006508;GO:0006508;GO:0043531;GO:0043531;	-	-	25497185	LRR and NB-ARC domain disease resistance protein
Medtr5g010090	10.6446	17.2238	4.06543	0.236035	-2.08293	0.0140717	0.464365	5	2623746	2625960	+	1302	Medtr5g010090	GO:0003824;GO:0003824;GO:0003873;GO:0004331;GO:0016301;GO:0016310;GO:0016311;GO:0016740;GO:0016787;GO:0046835;	-	-	11436776	phosphoglycerate mutase family protein
Medtr2g064840	624.696	870.172	379.221	0.4358	-1.19826	0.0141015	0.464745	2	29412952	29420822	+	3867	Medtr2g064840	GO:0003743;GO:0003743;GO:0003743;GO:0003924;GO:0003924;GO:0005525;GO:0005525;GO:0005622;GO:0006413;GO:0006413;GO:0006413;GO:0009570;GO:0009941;GO:0010027;GO:0016787;GO:0034660;GO:0042793;GO:0046777;	K02519	-	11428353	translation initiation factor IF-2
Medtr3g019320	48.048	64.6816	31.4145	0.485679	-1.04192	0.0143	0.469459	3	5399261	5401081	+	743	Medtr3g019320	GO:0006655;GO:0009535;GO:0009570;GO:0009941;GO:0090391;	-	-	11417698	LHCP translocation defect protein, putative
Medtr3g491830	177.371	239.985	114.758	0.478187	-1.06435	0.0145786	0.475138	3	41806436	41810585	+	1554	Medtr3g491830	GO:0003824;GO:0003824;GO:0004721;GO:0004722;GO:0004722;GO:0006470;GO:0006470;GO:0016020;GO:0016021;GO:0016787;GO:0043169;GO:0043169;GO:0046872;GO:0046872;	-	-	25491130	protein phosphatase 2C-like protein
Medtr6g088270	887.538	1212.41	562.67	0.464093	-1.10751	0.0146286	0.475624	6	33413908	33420399	-	5162	Medtr6g088270	GO:0003676;GO:0003676;GO:0003746;GO:0003746;GO:0003746;GO:0005515;GO:0005739;GO:0005739;GO:0005840;GO:0006412;GO:0006414;GO:0006414;GO:0006414;	K02357	-	11427581	elongation factor Ts protein
Medtr5g017050	29.721	41.9554	17.4865	0.416787	-1.26262	0.0148705	0.479504	5	6182657	6189170	+	1948	Medtr5g017050	GO:0003824;GO:0003824;GO:0004514;GO:0004514;GO:0004514;GO:0004516;GO:0004516;GO:0004516;GO:0009435;GO:0009435;GO:0009435;GO:0016740;GO:0016757;GO:0016874;GO:0019358;GO:0019358;GO:0019358;GO:0019363;	K00763	[EC:6.3.4.21]	11410925	nicotinate phosphoribosyltransferase-like protein
Medtr1g080820	25.5773	43.8114	7.34314	0.167608	-2.57684	0.0149686	0.48142	1	35952385	35953845	-	758	Medtr1g080820	GO:0042742;GO:0042742;GO:0050832;GO:0050832;	-	-	25484636	Chitinase / Hevein / PR-4 / Wheatwin2
Medtr3g070100	377.295	611.36	143.229	0.23428	-2.09369	0.015073	0.483575	3	31389210	31392182	+	1604	Medtr3g070100	GO:0000023;GO:0000165;GO:0005975;GO:0005975;GO:0006612;GO:0009409;GO:0009570;GO:0009595;GO:0009657;GO:0009697;GO:0009862;GO:0009867;GO:0009941;GO:0010103;GO:0010200;GO:0010310;GO:0010363;GO:0016311;GO:0016787;GO:0016791;GO:0016791;GO:0019252;GO:0019253;GO:0019344;GO:0019761;GO:0031348;GO:0035304;GO:0042578;GO:0042578;GO:0043900;GO:0050278;GO:0050278;	K01100	[EC:3.1.3.37]	11408199	sedoheptulose-1,7-bisphosphatase
Medtr1g041390	19.5897	28.8673	10.3122	0.357227	-1.48509	0.01549	0.492808	1	15448384	15449689	-	982	Medtr1g041390	GO:0015996;GO:0015996;GO:0016787;GO:0047746;GO:0047746;GO:0047746;GO:0102293;	K08099	[EC:3.1.1.14]	25482954	chlorophyllase enzyme
Medtr5g071190	26.7463	38.3323	15.1604	0.395499	-1.33825	0.01555	0.493264	5	30193271	30196237	+	2967	Medtr5g071190	GO:0005515;GO:0005634;GO:0005634;GO:0005737;GO:0008270;GO:0008270;GO:0009507;GO:0009507;	-	-	11407884	PPR containing plant-like protein
Medtr1g076920	20.2895	31.6012	8.97784	0.284098	-1.81554	0.0156376	0.494807	1	34325139	34327795	-	1245	Medtr1g076920	GO:0016787;GO:0016787;GO:0047746;GO:0102293;	-	-	25484504	alpha/beta fold hydrolase
Medtr6g007180	206.487	278.484	134.489	0.482933	-1.05011	0.0157516	0.495363	6	1497205	1501037	-	1271	Medtr6g007180	GO:0005634;GO:0005739;GO:0009535;GO:0009570;GO:0009941;GO:0048564;GO:0048564;GO:0098572;	-	-	25495174	calcium homeostasis regulator CHoR1, putative
Medtr1g015980	178.121	248.824	107.417	0.431698	-1.2119	0.015786	0.495363	1	4141021	4143821	-	1944	Medtr1g015980	GO:0004553;GO:0004553;GO:0005975;GO:0005975;GO:0008152;GO:0016787;GO:0016798;	K01193	[EC:3.2.1.26]	11417860	fructan exohydrolase
Medtr8g467340	34.1935	48.5196	19.8675	0.409474	-1.28816	0.0158086	0.495363	8	24180617	24182295	+	1679	Medtr8g467340	GO:0003677;GO:0003677;GO:0003677;	-	-	25502694	homeobox domain, ZF-HD class protein
Medtr8g013030	2.84535	5.6907	0	0	-Inf	0.015955	0.497774	8	4048441	4052164	-	1361	Medtr8g013030	GO:0005515;	-	-	25500338	ubiquitin-associated (UBA)/TS-N domain protein
Medtr5g059410	456.844	638.145	275.543	0.431787	-1.21161	0.0160298	0.498514	5	24641837	24645325	-	2208	Medtr5g059410	GO:0003824;GO:0003824;GO:0004802;GO:0004802;GO:0004802;GO:0016740;	K00615	[EC:2.2.1.1]	11423341	plastid transketolase
Medtr5g042100	18.1313	27.3191	8.94354	0.327374	-1.61099	0.0161407	0.499916	5	18517077	18518659	-	1583	Medtr5g042100	GO:0016787;	-	-	11419107	arabinanase/levansucrase/invertase, putative
Medtr8g468600	40.5701	54.9767	26.1635	0.475901	-1.07127	0.0161536	0.499916	8	24863982	24868612	+	1408	Medtr8g468600	GO:0003676;GO:0003676;GO:0008270;GO:0008270;	-	-	25502759	zinc knuckle (CCHC-type) family protein
Medtr6g018300	229.769	377.694	81.845	0.216697	-2.20625	0.0164025	0.50454	6	7006187	7007659	+	770	Medtr6g018300	GO:0004497;GO:0004497;GO:0009507;GO:0009507;GO:0009536;GO:0009853;GO:0009853;GO:0009853;GO:0015977;GO:0015977;GO:0015979;GO:0015979;GO:0016491;GO:0016829;GO:0016984;GO:0016984;GO:0055114;	K01602	[EC:4.1.1.39]	11420076	ribulose bisphosphate carboxylase small chain
Medtr4g057670	369.433	518.339	220.526	0.425448	-1.23295	0.0164999	0.505697	4	21193094	21196361	+	1719	Medtr4g057670	GO:0003824;GO:0003824;GO:0004332;GO:0004332;GO:0004332;GO:0006096;GO:0006096;GO:0006096;GO:0016829;	K01623	[EC:4.1.2.13]	25492390	fructose-bisphosphate aldolase class I
Medtr4g061800	32.5586	44.9275	20.1897	0.449384	-1.15398	0.0168979	0.514788	4	22852950	22876102	-	4488	Medtr4g061800	GO:0003677;GO:0003677;GO:0003899;GO:0003899;GO:0003899;GO:0006351;GO:0006351;GO:0016740;GO:0016779;	K03018	[EC:2.7.7.6]	11410173	DNA-directed RNA polymerase I protein
Medtr6g084120	68.3935	105.797	30.9896	0.292915	-1.77144	0.0172328	0.521578	6	31420208	31422275	+	792	Medtr6g084120	GO:0006355;GO:0006355;GO:0046983;GO:0046983;	-	-	11438389	transcription factor
Medtr2g100900	28.9823	40.651	17.3135	0.425907	-1.23139	0.0172766	0.521578	2	43406861	43407985	-	453	Medtr2g100900	GO:0000160;GO:0000160;GO:0005622;GO:0016301;GO:0016310;	K14490	-	11441994	histidine phosphotransfer protein
Medtr1g087200	82.7237	131.099	34.3479	0.261999	-1.93237	0.0172852	0.521578	1	39067837	39069242	+	730	Medtr1g087200	GO:0002238;GO:0005773;	-	-	11414888	universal stress family protein
Medtr4g127420	54.6323	73.8766	35.388	0.479015	-1.06186	0.0174358	0.524252	4	52887578	52890899	+	2560	Medtr4g127420	GO:0005515;GO:0005634;GO:0005634;	-	-	11441754	import apparatus protein
Medtr8g036185	23.0434	33.0628	13.0239	0.393914	-1.34405	0.0176628	0.525698	8	13370006	13372792	+	2001	Medtr8g036185	GO:0004497;GO:0004497;GO:0005506;GO:0005506;GO:0016020;GO:0016021;GO:0016021;GO:0016491;GO:0016705;GO:0016705;GO:0020037;GO:0020037;GO:0046872;GO:0055114;GO:0055114;GO:0055114;	-	-	25501025	cytochrome P450 family protein
Medtr4g082330	10.8725	17.5511	4.19381	0.238948	-2.06523	0.0176703	0.525698	4	32059376	32062499	-	1063	Medtr4g082330	GO:0016020;GO:0016021;GO:0016021;	-	-	25492970	transmembrane protein, putative
Medtr5g027010	8.33173	14.2371	2.42632	0.170422	-2.55282	0.0177087	0.526222	5	11190213	11191060	-	609	Medtr5g027010	GO:0009507;GO:0009535;GO:0016020;GO:0016021;GO:0016021;GO:0016556;	-	-	11412832	transmembrane protein, putative
Medtr4g106860	698.719	932.955	464.483	0.497862	-1.00618	0.0178675	0.526954	4	44104817	44105867	-	767	Medtr4g106860	-	-	-	11440187	gibberellin-regulated family protein
Medtr2g022140	20.3995	29.7129	11.0862	0.373109	-1.42233	0.0179808	0.527514	2	7593304	7596065	-	2762	Medtr2g022140	GO:0008033;GO:0008033;GO:0016740;GO:0016740;	K10760	-	25486078	adenylate isopentenyltransferase
Medtr1g103290	216.816	319.38	114.252	0.35773	-1.48306	0.0181108	0.530099	1	46744608	46748707	+	1610	Medtr1g103290	GO:0005737;GO:0005886;GO:0005886;GO:0008168;GO:0008270;GO:0008270;GO:0008898;GO:0009086;GO:0009086;GO:0016740;GO:0032259;GO:0046872;GO:0047150;GO:0047150;GO:0008168;GO:0008168;GO:0008898;GO:0016740;GO:0032259;GO:0046872;GO:0046872;	K00547	[EC:2.1.1.10]	25485172	homocysteine S-methyltransferase-like protein
Medtr4g131400	33.4965	46.6391	20.3538	0.436412	-1.19624	0.0181525	0.530099	4	54819199	54820948	-	997	Medtr4g131400	GO:0005215;GO:0005215;GO:0016491;GO:0055114;	K03098	-	11436323	temperature-induced lipocalin
Medtr4g006070	80.8933	113.095	48.6912	0.430532	-1.21581	0.0186006	0.53946	4	493796	495841	-	1128	Medtr4g006070	-	-	-	11421757	hypothetical protein
Medtr5g009810	34.9243	53.0838	16.7647	0.315815	-1.66285	0.0189089	0.545286	5	2467567	2472426	+	1404	Medtr5g009810	GO:0016020;GO:0016021;GO:0016021;GO:0031969;GO:0042631;	-	-	11442400	GDT1-like protein
Medtr4g064963	6.54281	11.3801	1.7055	0.149867	-2.73825	0.0190937	0.549366	4	24295511	24296302	-	792	Medtr4g064963	GO:0005375;GO:0005375;GO:0016020;GO:0016021;GO:0016021;GO:0016021;GO:0035434;GO:0035434;	K14686	-	25492554	Ctr family copper transporter
Medtr5g098780	21.6582	31.1942	12.1223	0.388608	-1.36361	0.0192313	0.552555	5	43255552	43257471	-	907	Medtr5g098780	GO:0009507;GO:0009522;GO:0009522;GO:0009523;GO:0009523;GO:0009535;GO:0009535;GO:0009536;GO:0009579;GO:0009765;GO:0009765;GO:0015979;GO:0016020;GO:0016020;GO:0016020;GO:0016021;GO:0016021;GO:0016168;GO:0016168;GO:0018298;GO:0018298;	K08909	-	11424077	light-harvesting complex I chlorophyll A/B-binding protein
Medtr1g070495	113.777	168.824	58.7288	0.34787	-1.52338	0.0198043	0.564258	1	31300960	31302315	+	720	Medtr1g070495	GO:0009507;GO:0009507;GO:0009523;GO:0009523;GO:0015979;GO:0015979;GO:0016020;GO:0016021;GO:0016021;	K02721	-	25484344	photosystem II reaction center W
Medtr1g106075	9.68246	15.5744	3.79053	0.243382	-2.0387	0.0198165	0.564258	1	48006741	48007669	+	604	Medtr1g106075	GO:0009522;GO:0009522;GO:0015979;GO:0015979;	-	-	25485324	photosystem I reaction center subunit N
Medtr4g098620	31.9731	44.9069	19.0393	0.423974	-1.23795	0.0198336	0.564258	4	40648754	40649981	+	868	Medtr4g098620	-	-	-	11410461	TLD protein
Medtr5g019920	3.58859	6.82534	0.351831	0.0515478	-4.27795	0.019934	0.566479	5	7558951	7559667	+	717	Medtr5g019920	GO:0016020;GO:0016021;GO:0016021;	-	-	11408047	plant/T3A5-60 protein
Medtr3g068030	2509.93	4136.47	883.389	0.213561	-2.22728	0.0205231	0.578682	3	30664861	30668380	-	2852	Medtr3g068030	GO:0005524;GO:0005524;GO:0005524;GO:0005524;GO:0016787;	-	-	25489329	ribulose bisphosphate carboxylase/oxygenase activase
Medtr1g103150	142.405	195.657	89.1522	0.455655	-1.13399	0.0210648	0.588077	1	46655675	46657091	-	1417	Medtr1g103150	GO:0004042;GO:0016740;GO:0016746;GO:0016747;GO:0016747;GO:0103045;	-	-	25485159	acetyltransferase (GNAT) domain protein
Medtr5g042420	61.5208	83.7993	39.2423	0.468289	-1.09453	0.0213261	0.593684	5	18647198	18649091	+	901	Medtr5g042420	GO:0006979;GO:0006979;GO:0006979;GO:0009507;GO:0009507;GO:0009507;GO:0009535;GO:0009535;GO:0009535;GO:0010027;GO:0030003;GO:0070838;	-	-	11408903	NAD(P)H dehydrogenase
Medtr3g064350	57.9226	87.5123	28.333	0.32376	-1.627	0.0215939	0.600103	3	28959653	28961077	+	1091	Medtr3g064350	-	-	-	11413760	hypothetical protein
Medtr3g053350	56.3068	76.1252	36.4884	0.479321	-1.06094	0.0216971	0.601756	3	21206311	21211857	-	4520	Medtr3g053350	GO:0005515;	-	-	25488998	PPR containing plant-like protein
Medtr4g009620	5.5409	11.0818	0	0	-Inf	0.0219235	0.604074	4	1983849	1985766	-	1918	Medtr4g009620	GO:0016020;GO:0016021;GO:0016021;	-	-	11418695	UPF0481 plant-like protein
Medtr4g099110	612.147	826.201	398.093	0.481836	-1.05339	0.022029	0.606323	4	41042225	41044834	+	2043	Medtr4g099110	GO:0000272;GO:0000272;GO:0000272;GO:0005975;GO:0008152;GO:0016161;GO:0016161;GO:0016161;GO:0016787;GO:0016798;GO:0102229;GO:0102229;	K01177	[EC:3.2.1.2]	25493571	beta-amylase
Medtr3g077550	190.599	301.462	79.7368	0.2645	-1.91866	0.0220581	0.606466	3	34856959	34863246	+	3447	Medtr3g077550	GO:0000023;GO:0010103;GO:0016020;GO:0016021;GO:0016021;GO:0016556;GO:0019252;	-	-	11438490	transmembrane protein, putative
Medtr4g098500	41.5383	69.7976	13.279	0.190249	-2.39404	0.0221076	0.607168	4	40583419	40586734	-	2860	Medtr4g098500	GO:0031348;GO:0034051;GO:0045595;	-	-	11409342	LSD1-type zinc finger protein
Medtr8g010120	12.0584	18.6462	5.47055	0.293386	-1.76913	0.0226229	0.617313	8	2567010	2570974	-	1289	Medtr8g010120	GO:0009507;GO:0016787;GO:0016787;GO:0016787;GO:0016787;	-	-	25500207	alpha/beta fold hydrolase
Medtr2g015470	6.41248	12.825	0	0	-Inf	0.0228478	0.620075	2	4582493	4584280	-	1376	Medtr2g015470	GO:0005215;GO:0005215;GO:0016020;GO:0016021;GO:0016021;GO:0016021;	-	-	11445848	purine permease
Medtr6g488190	16.0584	23.8444	8.27245	0.346935	-1.52726	0.022862	0.620075	6	33230154	33231399	-	1246	Medtr6g488190	-	-	-	25497383	hypothetical protein
Medtr3g087278	6.18395	10.6087	1.75916	0.165821	-2.5923	0.0229565	0.620075	3	39568320	39569238	-	919	Medtr3g087278	-	-	-	25489681	C2 domain protein
Medtr5g093530	4.22386	7.77835	0.669363	0.0860547	-3.5386	0.0231619	0.620382	5	40841642	40843862	-	2100	Medtr5g093530	GO:0000145;GO:0000145;GO:0006887;GO:0006887;GO:0006887;GO:0015031;GO:0015031;GO:0016020;GO:0016021;GO:0016021;	-	-	11437088	exocyst subunit exo70 family protein
Medtr5g032960	4.16748	7.98314	0.351831	0.0440718	-4.504	0.0232244	0.620382	5	14199883	14201643	-	1682	Medtr5g032960	GO:0005515;	-	-	11415570	PB1 domain protein
Medtr8g018110	27.006	39.704	14.308	0.360367	-1.47246	0.023569	0.625408	8	6116870	6118160	+	1222	Medtr8g018110	GO:0005515;	-	-	11428616	F-box protein interaction domain protein
Medtr6g048860	4.90845	8.76801	1.04888	0.119626	-3.06339	0.023733	0.627576	6	17715745	17719286	+	1077	Medtr6g048860	GO:0005524;GO:0005524;	K03696	-	25496455	AAA family ATPase
Medtr8g085650	7.30714	12.1752	2.43906	0.20033	-2.31955	0.0237756	0.62784	8	35499047	35500690	-	1644	Medtr8g085650	GO:0005515;	-	-	11419026	F-box/kelch-repeat plant-like protein
Medtr8g063930	28.9126	41.1694	16.6557	0.404564	-1.30556	0.0239069	0.628689	8	26812665	26816284	+	1239	Medtr8g063930	GO:0016020;GO:0016021;GO:0016021;	-	-	25501296	transmembrane protein
Medtr1g012550	18.8874	27.332	10.4428	0.382071	-1.38809	0.0239477	0.629064	1	2527615	2531238	-	3624	Medtr1g012550	GO:0000166;GO:0004672;GO:0004672;GO:0004674;GO:0004674;GO:0004674;GO:0005524;GO:0005524;GO:0005524;GO:0006468;GO:0006468;GO:0016020;GO:0016021;GO:0016021;GO:0016301;GO:0016310;GO:0016740;GO:0030246;GO:0030246;	-	-	11431344	G-type lectin S-receptor-like Serine/Threonine-kinase SD2-5
Medtr7g024760	39.1601	52.2972	26.0231	0.4976	-1.00694	0.0243155	0.636668	7	8169263	8169963	-	701	Medtr7g024760	GO:0016740;GO:0016747;GO:0016747;	-	-	11445865	acetyltransferase (GNAT) domain protein
Medtr4g055725	3.43613	6.53758	0.334682	0.0511935	-4.2879	0.0245892	0.638037	4	20357854	20358772	+	801	Medtr4g055725	GO:0016020;GO:0016021;GO:0016021;	K23222	[EC:3.1.-.-]	25492319	transmembrane protein, putative
Medtr2g017950	42.3648	61.207	23.5226	0.384311	-1.37965	0.0248401	0.642576	2	5273119	5274452	+	1334	Medtr2g017950	-	-	-	11442920	fasciclin domain protein
Medtr2g080290	14.9817	22.3458	7.61756	0.340895	-1.5526	0.0251331	0.644398	2	33894169	33898613	-	2527	Medtr2g080290	GO:0016020;GO:0016021;GO:0016021;	-	-	25487408	transmembrane protein, putative
Medtr4g089065	6.69055	11.2917	2.08943	0.185042	-2.43408	0.0252244	0.644398	4	35683885	35688686	+	1894	Medtr4g089065	GO:0000506;GO:0000506;GO:0006506;GO:0006506;GO:0016740;GO:0016757;GO:0016757;GO:0017176;GO:0017176;GO:0017176;	K03857	[EC:2.4.1.198]	25493201	phosphatidylinositol N-acetylglucosaminyltransferase
Medtr4g485530	2.54601	5.09202	0	0	-Inf	0.0257968	0.652686	4	33337240	33340075	+	825	Medtr4g485530	GO:0003677;GO:0003677;GO:0003677;GO:0005634;	K09422	-	25494446	myb transcription factor
Medtr8g092140	48.3908	71.003	25.7786	0.363064	-1.46171	0.0258569	0.653476	8	38494755	38496916	-	1032	Medtr8g092140	GO:0003677;GO:0003700;GO:0003700;GO:0005634;GO:0005634;GO:0006355;GO:0006355;GO:0043565;GO:0043565;	-	-	11442562	WRKY family transcription factor
Medtr5g093830	349.566	489.837	209.295	0.427275	-1.22676	0.0258795	0.653476	5	40962135	40967479	+	2123	Medtr5g093830	GO:0000023;GO:0000413;GO:0003755;GO:0006457;GO:0006457;GO:0009507;GO:0009570;GO:0009570;GO:0009941;GO:0009941;GO:0010027;GO:0010103;GO:0015031;GO:0015031;GO:0016556;GO:0016853;GO:0019252;GO:0034660;	K03545	-	11427367	trigger factor-like protein
Medtr7g021750	37.3887	54.687	20.0904	0.367371	-1.44469	0.0260718	0.654895	7	6941811	6942926	-	1116	Medtr7g021750	GO:0009055;GO:0009055;GO:0009523;GO:0009523;GO:0009772;GO:0009772;GO:0015979;GO:0016020;GO:0016021;GO:0016021;GO:0016491;GO:0019684;GO:0019684;GO:0045156;GO:0045156;GO:0046872;GO:0046872;GO:0055114;	K02703	[EC:1.10.3.9]	11431455	photosystem II Q(B) protein
Medtr1g088225	4.85508	9.35833	0.351831	0.0375955	-4.7333	0.0261119	0.654895	1	39470494	39472430	+	1739	Medtr1g088225	GO:0004857;GO:0004857;GO:0005618;GO:0009522;GO:0009579;GO:0015979;GO:0016021;GO:0016787;GO:0030599;GO:0030599;GO:0030599;GO:0042545;GO:0042545;GO:0042545;GO:0043086;GO:0045330;GO:0045330;GO:0045490;GO:0045490;	K01051	[EC:3.1.1.11]	25484751	pectinesterase/pectinesterase inhibitor
Medtr2g024300	2.51546	5.03092	0	0	-Inf	0.0264405	0.660096	2	8743788	8745478	+	949	Medtr2g024300	-	-	-	25486226	chaperonin-like RbcX protein
Medtr3g109280	29.9665	42.3099	17.6232	0.416527	-1.26352	0.0267552	0.665002	3	50521343	50526152	+	693	Medtr3g109280	GO:0016020;GO:0016021;GO:0016021;	-	-	11423379	plant/F12B17-70 protein
Medtr6g006060	92.3736	127.444	57.3034	0.449636	-1.15317	0.0270015	0.669327	6	991507	992343	-	837	Medtr6g006060	GO:0003735;GO:0003735;GO:0005622;GO:0005840;GO:0005840;GO:0005840;GO:0006412;GO:0006412;	K02935	-	25495155	50S ribosomal protein L7/L12
Medtr4g076520	23.1974	32.7253	13.6695	0.417705	-1.25944	0.027342	0.669864	4	29259741	29265947	-	1858	Medtr4g076520	GO:0008909;GO:0008909;GO:0008909;GO:0009058;GO:0009058;GO:0016853;	K02552	[EC:5.4.4.2]	11439713	isochorismate synthase
Medtr0062s0040	47.8169	68.0631	27.5708	0.405077	-1.30373	0.0278562	0.67723	scaffold0062	35847	36998	+	1152	Medtr0062s0040	GO:0004568;GO:0005975;GO:0005975;GO:0008152;GO:0016787;GO:0016798;	-	-	25480092	narbonin-like 2S protein
Medtr5g086040	30.4029	42.413	18.3928	0.43366	-1.20537	0.0280349	0.677757	5	37200474	37204679	+	3480	Medtr5g086040	GO:0004672;GO:0004672;GO:0005524;GO:0005524;GO:0006468;GO:0006468;GO:0016020;GO:0016021;GO:0016021;GO:0016301;GO:0016310;GO:0000166;GO:0004672;GO:0004672;GO:0004674;GO:0004674;GO:0005524;GO:0005524;GO:0005524;GO:0006468;GO:0006468;GO:0016301;GO:0016310;GO:0004672;GO:0004672;GO:0005524;GO:0005524;GO:0006468;GO:0006468;GO:0016020;GO:0016021;GO:0016021;GO:0016301;GO:0016310;GO:0000166;GO:0004672;GO:…	K13429	-	11429650	LysM receptor kinase K1B
Medtr1g044785	4.73186	8.40822	1.05549	0.125531	-2.99388	0.0286141	0.685589	1	16921077	16923253	+	1142	Medtr1g044785	GO:0005515;GO:0005634;GO:0005634;	-	-	25483026	CCT motif protein
Medtr4g094785	19.5427	27.9843	11.1011	0.39669	-1.33391	0.0289133	0.687934	4	38997044	38999561	+	941	Medtr4g094785	GO:0000413;GO:0003755;GO:0003755;GO:0009507;GO:0016853;GO:0031977;	K01802	[EC:5.2.1.8]	25493451	FKBP-type peptidyl-prolyl cis-trans isomerase
Medtr4g131760	62.086	107.784	16.3879	0.152043	-2.71745	0.029161	0.691606	4	54969308	54974189	-	1789	Medtr4g131760	GO:0000166;GO:0005524;GO:0005524;GO:0005978;GO:0005978;GO:0008878;GO:0008878;GO:0008878;GO:0009058;GO:0009058;GO:0009507;GO:0009507;GO:0009536;GO:0009570;GO:0009637;GO:0009941;GO:0010027;GO:0010114;GO:0010218;GO:0016740;GO:0016779;GO:0016779;GO:0016779;GO:0019252;GO:0019252;GO:0019252;	K00975	[EC:2.7.7.27]	11443131	glucose-1-phosphate adenylyltransferase family protein
Medtr5g091050	58.2401	108.183	8.29747	0.0766986	-3.70466	0.0295058	0.69582	5	39675490	39677929	+	2201	Medtr5g091050	GO:0004420;GO:0004420;GO:0004420;GO:0005783;GO:0005789;GO:0005789;GO:0008299;GO:0008299;GO:0015936;GO:0015936;GO:0016020;GO:0016021;GO:0016021;GO:0016021;GO:0016491;GO:0016616;GO:0016616;GO:0050661;GO:0050661;GO:0050662;GO:0050662;GO:0055114;GO:0055114;GO:0055114;	K00021	[EC:1.1.1.34]	11435433	3-hydroxy-3-methylglutaryl-coenzyme A reductase-like protein
Medtr7g026770	4.05279	7.40633	0.699256	0.0944133	-3.40487	0.0296329	0.69582	7	8908711	8911132	+	981	Medtr7g026770	GO:0004791;GO:0005623;GO:0005623;GO:0009055;GO:0009055;GO:0015035;GO:0015035;GO:0016491;GO:0016747;GO:0016747;GO:0022900;GO:0045454;GO:0045454;GO:0055114;GO:0055114;GO:0098869;	-	-	11441324	glutaredoxin-C3-like protein
Medtr4g052420	485.553	679.758	291.348	0.428605	-1.22228	0.0296399	0.69582	4	18978807	18981076	-	955	Medtr4g052420	GO:0016020;GO:0016021;GO:0016021;GO:0016491;GO:0055114;GO:0009507;GO:0009522;GO:0009767;GO:0016020;GO:0016021;GO:0016021;	K14332	-	25492256	photosystem I subunit O
Medtr5g097280	570.112	787.177	353.048	0.448498	-1.15683	0.0298547	0.698438	5	42601906	42603573	+	1334	Medtr5g097280	GO:0009507;GO:0009522;GO:0009522;GO:0009523;GO:0009523;GO:0009535;GO:0009535;GO:0009536;GO:0009579;GO:0009765;GO:0009765;GO:0015979;GO:0016020;GO:0016020;GO:0016020;GO:0016021;GO:0016021;GO:0016168;GO:0016168;GO:0018298;GO:0018298;	K08913	-	11434875	light-harvesting complex I chlorophyll A/B-binding protein
Medtr4g068970	87.3861	141.621	33.1516	0.234088	-2.09488	0.0298825	0.698438	4	25892682	25897576	-	2306	Medtr4g068970	GO:0009507;GO:0009534;GO:0009535;GO:0009941;GO:0098807;	-	-	25492706	NAD-dependent epimerase/dehydratase family protein
Medtr4g074590	31.4312	42.6321	20.2303	0.474533	-1.07542	0.0303424	0.703977	4	28408550	28411579	-	1012	Medtr4g074590	-	-	-	11439196	DUF177 domain protein
Medtr4g007080	47.8487	77.3152	18.3823	0.237757	-2.07244	0.0303545	0.703977	4	940545	943387	+	1598	Medtr4g007080	GO:0009535;GO:0009535;GO:0009773;GO:0010598;GO:0010598;GO:0016740;GO:0016757;GO:0016757;	-	-	11420491	NDH-dependent cyclic electron flow protein
Medtr1g083110	10.1716	15.8512	4.49199	0.283385	-1.81917	0.0303747	0.703977	1	36992065	36993182	+	852	Medtr1g083110	GO:0005509;GO:0005509;GO:0009523;GO:0009523;GO:0009654;GO:0009654;GO:0015979;GO:0015979;GO:0016020;GO:0016021;GO:0016021;GO:0019898;GO:0019898;	-	-	11408732	photosystem II reaction center PsbP family protein
Medtr3g056615	8.71339	13.9687	3.45805	0.247556	-2.01417	0.030877	0.712081	3	22631994	22632929	-	936	Medtr3g056615	GO:0016787;GO:0043531;GO:0043531;	-	-	25489070	NB-ARC domain disease resistance protein
Medtr2g042720	105.369	177.878	32.861	0.184739	-2.43644	0.0310718	0.713584	2	18631754	18633760	-	947	Medtr2g042720	GO:0009507;GO:0009522;GO:0009522;GO:0009523;GO:0009523;GO:0009535;GO:0009535;GO:0009536;GO:0009579;GO:0009644;GO:0009765;GO:0009765;GO:0015979;GO:0016020;GO:0016020;GO:0016020;GO:0016021;GO:0016021;GO:0016168;GO:0016168;GO:0018298;GO:0018298;GO:0019761;GO:0030003;GO:0070838;	K08908	-	11440680	light-harvesting complex I chlorophyll A/B-binding protein
Medtr6g004000	5.71127	10.736	0.686513	0.0639448	-3.96703	0.0311484	0.714266	6	58842	60515	-	1134	Medtr6g004000	GO:0000166;GO:0005524;GO:0005524;	K10355	-	25495077	actin-97
Medtr4g020535	21.5465	31.3822	11.7107	0.373163	-1.42212	0.0313044	0.714348	4	6529032	6537211	-	3795	Medtr4g020535	GO:0005515;GO:0007165;GO:0007165;GO:0043531;GO:0043531;	-	-	25491558	disease resistance protein (TIR-NBS-LRR class)
Medtr8g037923	5.88185	10.0454	1.71825	0.171048	-2.54753	0.031374	0.714348	8	14059038	14063483	-	4446	Medtr8g037923	GO:0016020;GO:0016021;GO:0016021;	-	-	25501073	DUF247 domain protein
Medtr6g079630	5.87482	10.0142	1.7354	0.173293	-2.52872	0.031453	0.714348	6	29058520	29059610	+	1091	Medtr6g079630	GO:0004553;GO:0004553;GO:0004568;GO:0005975;GO:0005975;GO:0008152;GO:0016787;GO:0016798;	-	-	11420203	chitinase
Medtr2g082580	56.6177	85.373	27.8624	0.32636	-1.61546	0.0315101	0.714348	2	34654413	34656157	-	893	Medtr2g082580	GO:0000023;GO:0005509;GO:0005509;GO:0009344;GO:0009344;GO:0009344;GO:0009507;GO:0009523;GO:0009523;GO:0009534;GO:0009535;GO:0009535;GO:0009535;GO:0009654;GO:0009654;GO:0009767;GO:0009767;GO:0015979;GO:0015979;GO:0019252;GO:0019898;GO:0019898;GO:0045156;GO:0045156;	K08901	-	11405533	oxygen-evolving enhancer protein
Medtr5g075220	214.474	304.451	124.498	0.408925	-1.29009	0.03164	0.714348	5	31949940	31954029	-	2811	Medtr5g075220	GO:0004672;GO:0004672;GO:0005524;GO:0005524;GO:0006468;GO:0006468;GO:0010260;GO:0016301;GO:0016310;GO:0016740;GO:0019375;GO:0042631;GO:0046777;	K08867	[EC:2.7.11.1]	11435320	WNK kinase
Medtr4g015860	16.2851	26.2763	6.29378	0.239523	-2.06176	0.0318333	0.716801	4	4822257	4824344	+	1122	Medtr4g015860	GO:0009534;GO:0009941;	-	-	25491449	rhodanese/cell cycle control phosphatase superfamily protein
Medtr4g072990	219.017	355.392	82.6411	0.232535	-2.10448	0.0322089	0.723972	4	27601069	27612939	-	4703	Medtr4g072990	GO:0005515;GO:0010027;GO:0010103;GO:0016020;GO:0016021;GO:0016021;GO:0016556;GO:0034660;GO:0042793;GO:0048255;GO:0005515;GO:0016020;GO:0016021;GO:0016021;	-	-	11438113	PPR containing plant-like protein
Medtr1g075095	17.072	31.7691	2.37487	0.0747539	-3.74171	0.0323299	0.726049	1	33177914	33182631	+	1995	Medtr1g075095	GO:0010088;GO:0010088;	-	-	25484441	sieve element occlusion protein
Medtr4g125600	22.4882	34.6942	10.2823	0.296369	-1.75454	0.0324111	0.727229	4	52113366	52114050	-	685	Medtr4g125600	GO:0009523;GO:0009523;GO:0015979;GO:0015979;GO:0016020;GO:0016020;GO:0016020;GO:0016021;GO:0016021;GO:0016491;GO:0055114;	K22048	-	25494189	ultraviolet-B-repressible protein
Medtr2g091280	18.9173	27.0703	10.7642	0.397639	-1.33047	0.0328525	0.736483	2	39414655	39416847	-	2193	Medtr2g091280	-	-	-	25487790	myosin heavy chain-like protein, putative
Medtr8g102350	19.0193	27.6489	10.3896	0.375768	-1.41209	0.0329082	0.73708	8	43068481	43069689	+	1086	Medtr8g102350	-	-	-	11415745	hypothetical protein
Medtr3g018680	33.5857	45.2295	21.942	0.485125	-1.04357	0.0329778	0.737987	3	5130814	5132894	-	1234	Medtr3g018680	GO:0005515;	-	-	11427876	F-box/RNI superfamily protein, putative
Medtr1g024840	27.3197	37.3896	17.2498	0.461353	-1.11606	0.0331504	0.739893	1	7924436	7926622	-	820	Medtr1g024840	GO:0003756;GO:0009535;GO:0009570;GO:0010206;GO:0016020;GO:0016021;GO:0016021;GO:0016853;	K22520	[EC:5.3.4.1]	11416394	protein disulfide-isomerase LQY1
Medtr7g080220	34.781	46.4493	23.1126	0.497589	-1.00697	0.03334	0.743336	7	30494307	30497675	+	1679	Medtr7g080220	GO:0010027;GO:0019252;GO:0019761;GO:0034660;GO:0010027;GO:0019252;GO:0019761;GO:0034660;	-	-	11436718	DUF2358 family protein
Medtr8g070840	11.8409	18.8999	4.78183	0.253008	-1.98274	0.0341384	0.754643	8	30016750	30019480	+	2279	Medtr8g070840	-	-	-	25501532	WEAK movement UNDER BLUE LIGHT-like protein
Medtr3g035635	152.333	215.542	89.1232	0.413483	-1.2741	0.0341841	0.754995	3	13224019	13224334	-	249	Medtr3g035635	-	-	-	25488795	hypothetical protein
Medtr6g084620	109.033	151.384	66.682	0.440482	-1.18284	0.0344152	0.755971	6	31773758	31776267	+	1052	Medtr6g084620	GO:0016020;GO:0016021;GO:0016021;	-	-	25496853	transmembrane protein, putative
Medtr1g074160	13.9092	20.5548	7.26353	0.353374	-1.50073	0.0345857	0.757275	1	32949714	32953706	+	1820	Medtr1g074160	GO:0016020;GO:0016020;GO:0016020;GO:0016021;GO:0016021;GO:0016021;GO:0022857;GO:0022857;GO:0055085;GO:0016020;GO:0016020;GO:0016020;GO:0016021;GO:0016021;GO:0016021;GO:0022857;GO:0022857;GO:0055085;	-	-	25484421	auxin-induced 5NG4-like protein
Medtr8g106530	6.96048	11.4969	2.42411	0.21085	-2.24571	0.0353212	0.766108	8	44943749	44946475	-	1527	Medtr8g106530	GO:0016020;GO:0016021;GO:0016021;	-	-	11409628	transmembrane protein, putative
Medtr7g118290	7.03385	11.6502	2.4175	0.207508	-2.26876	0.035711	0.771202	7	49092785	49094059	+	934	Medtr7g118290	GO:0009508;GO:0009579;GO:0009579;GO:0009941;GO:0010027;GO:0016020;GO:0016021;GO:0016021;GO:0016491;GO:0030093;GO:0035304;GO:0055114;GO:0009579;GO:0009579;GO:0016020;GO:0016021;GO:0016021;GO:0009579;GO:0009579;	-	-	11433472	thylakoid membrane phosphoprotein 14 kDa protein
Medtr6g463630	27.1393	38.2783	16.0003	0.417999	-1.25843	0.0361624	0.773772	6	22085198	22088447	-	1895	Medtr6g463630	GO:0004672;GO:0004672;GO:0005524;GO:0005524;GO:0006468;GO:0006468;GO:0016020;GO:0016021;GO:0016021;GO:0016301;GO:0016310;	-	-	25497170	tyrosine kinase family protein
Medtr1g049140	14.9142	21.8844	7.94391	0.362994	-1.46198	0.0365449	0.779434	1	18978653	18984068	+	2127	Medtr1g049140	GO:0003677;GO:0003677;GO:0003677;GO:0003700;GO:0003700;GO:0005634;GO:0005634;GO:0006351;GO:0006355;GO:0006355;GO:0003677;GO:0003677;GO:0003677;GO:0003700;GO:0003700;GO:0005634;GO:0005634;GO:0006351;GO:0006355;GO:0006355;GO:0016020;GO:0016021;GO:0016021;GO:0003677;GO:0003677;GO:0003677;GO:0003700;GO:0003700;GO:0005634;GO:0005634;GO:0006351;GO:0006355;GO:0006355;GO:0009909;GO:0010581;GO:0045892;GO:…	K09284	-	25483209	AP2 domain transcription factor
Medtr1g107165	14.8933	25.5689	4.21757	0.164949	-2.59991	0.0366716	0.780718	1	48499972	48501894	-	1923	Medtr1g107165	-	-	-	25485378	hypothetical protein
Medtr6g488150	20.8153	29.1454	12.4851	0.428375	-1.22305	0.0367024	0.780719	6	33216291	33219398	+	2285	Medtr6g488150	GO:0005515;GO:0005634;GO:0005634;GO:0005634;GO:0006351;GO:0006355;GO:0006355;GO:0009734;GO:0009734;GO:0005515;GO:0005634;GO:0005634;GO:0005634;GO:0006351;GO:0006355;GO:0006355;GO:0009734;GO:0009734;GO:0009734;	K14484	-	25497379	auxin response factor
Medtr1g070970	5.71016	9.73196	1.68835	0.173486	-2.52711	0.0368915	0.782773	1	31418091	31419980	-	1712	Medtr1g070970	-	-	-	11434143	DUF506 family protein
Medtr5g065010	6.80811	11.2563	2.35992	0.209653	-2.25392	0.0369444	0.783013	5	27326340	27329548	+	1244	Medtr5g065010	GO:0016491;GO:0016491;GO:0016491;GO:0045486;GO:0046872;GO:0046872;GO:0051213;GO:0055114;GO:0055114;GO:0055114;	-	-	11437117	flavonol synthase/flavanone 3-hydroxylase
Medtr5g017670	30.2962	40.8516	19.7408	0.483232	-1.04921	0.0373624	0.788073	5	6501172	6504197	-	1519	Medtr5g017670	GO:0006629;GO:0006629;GO:0006629;GO:0016042;GO:0016042;GO:0016787;GO:0016787;	-	-	11409904	patatin-like phospholipase
Medtr6g023770	71.2717	96.2465	46.2968	0.481024	-1.05582	0.0375295	0.790363	6	8347944	8354010	-	2661	Medtr6g023770	GO:0005247;GO:0005247;GO:0005247;GO:0006811;GO:0006821;GO:0006821;GO:0016020;GO:0016020;GO:0016020;GO:0016021;GO:0016021;GO:0030554;GO:0055085;GO:0055085;GO:1902476;GO:0005247;GO:0005247;GO:0005247;GO:0006811;GO:0006821;GO:0006821;GO:0016020;GO:0016020;GO:0016020;GO:0016021;GO:0016021;GO:0030554;GO:0055085;GO:0055085;GO:1902476;GO:0005247;GO:0005247;GO:0005247;GO:0006811;GO:0006821;GO:0006821;GO:…	K05016	-	11427694	ClC chloride channel family protein
Medtr1g066390	3.44707	6.55945	0.334682	0.0510228	-4.29271	0.0377262	0.793032	1	28610095	28611231	+	1137	Medtr1g066390	GO:0005515;GO:0005840;	K08770	-	11431263	pentameric polyubiquitin
Medtr4g010000	14.1993	20.8304	7.56832	0.363331	-1.46064	0.0380712	0.796088	4	2169395	2174858	-	1948	Medtr4g010000	GO:0003824;GO:0003824;GO:0009507;GO:0009570;GO:0009941;GO:0016787;GO:0016787;GO:0018786;GO:0016787;GO:0016787;	-	-	11434868	alpha/beta fold hydrolase
Medtr7g099390	21.6552	30.199	13.1114	0.434166	-1.20368	0.0382467	0.797523	7	39852234	39853569	-	969	Medtr7g099390	GO:0009522;GO:0009522;GO:0009538;GO:0009538;GO:0015979;GO:0015979;	K02693	-	11430839	photosystem I reaction center subunit IV A
Medtr3g064700	988.6	1338.9	638.302	0.476737	-1.06873	0.0388718	0.805163	3	29161367	29163606	-	820	Medtr3g064700	GO:0004364;GO:0005515;GO:0016740;GO:0016740;	K00799	[EC:2.5.1.18]	11411339	glutathione S-transferase, amino-terminal domain protein
Medtr8g087710	49.999	71.0845	28.9135	0.406748	-1.29779	0.0390464	0.805163	8	36261986	36264406	+	1488	Medtr8g087710	GO:0015267;GO:0015267;GO:0016020;GO:0016020;GO:0016020;GO:0016021;GO:0016021;GO:0055085;GO:0055085;	K09874	-	11419051	major intrinsic protein (MIP) family transporter
Medtr7g032900	115.172	159.714	70.6286	0.442218	-1.17717	0.0392293	0.807097	7	11602629	11604490	-	1271	Medtr7g032900	GO:0000023;GO:0008168;GO:0008168;GO:0008168;GO:0016556;GO:0016740;GO:0019252;GO:0032259;GO:0032259;	-	-	11435542	methyltransferase type 11
Medtr8g020590	193.734	374.207	13.2601	0.0354351	-4.81868	0.040138	0.813913	8	7259905	7260934	+	1030	Medtr8g020590	GO:0005576;GO:0005576;GO:0010103;GO:0030003;GO:0030145;GO:0030145;GO:0045735;GO:0045735;GO:0046872;GO:0070838;	-	-	11429465	auxin-binding protein ABP19a
Medtr2g011720	14.5049	22.7094	6.30039	0.277436	-1.84977	0.0401552	0.813913	2	2920754	2921483	+	619	Medtr2g011720	GO:0009570;GO:0010258;	-	-	25485922	receptor-interacting protein, putative
Medtr0018s0310	38.4801	55.3767	21.5835	0.389758	-1.35935	0.0407503	0.817309	scaffold0018	182962	186863	+	907	Medtr0018s0310	GO:0016020;GO:0016021;GO:0016021;	K12386	-	25479660	lysosomal cystine transporter family protein
Medtr8g063190	3.76842	6.86747	0.669363	0.0974687	-3.35892	0.0407843	0.817309	8	26455851	26460101	+	549	Medtr8g063190	GO:0010468;GO:0010468;	-	-	11407460	hypothetical protein
Medtr3g117590	3.74735	6.82534	0.669363	0.0980703	-3.35004	0.0412246	0.817309	3	55059923	55062189	-	1360	Medtr3g117590	GO:0004044;GO:0004044;GO:0004044;GO:0006164;GO:0006189;GO:0006189;GO:0009113;GO:0009113;GO:0009116;GO:0009116;GO:0009570;GO:0016740;GO:0016757;GO:0046872;GO:0046872;GO:0051536;GO:0051536;	K00764	[EC:2.4.2.14]	11417254	GLN phosphoribosyl pyrophosphate amidotransferase
Medtr3g115970	27.6822	37.4086	17.9557	0.479988	-1.05893	0.0417311	0.822214	3	54219710	54221727	+	977	Medtr3g115970	GO:0000413;GO:0003755;GO:0003755;GO:0009543;GO:0016853;	K01802	[EC:5.2.1.8]	11413096	FKBP-type peptidyl-prolyl cis-trans isomerase
Medtr2g044180	11.8347	17.7656	5.90372	0.332311	-1.58939	0.04202	0.824446	2	19206704	19214205	+	2332	Medtr2g044180	GO:0003824;GO:0003824;GO:0016874;GO:0016874;GO:0003824;GO:0003824;GO:0016874;GO:0016874;	K01913	[EC:6.2.1.1]	25486581	acetate/butyrate-CoA ligase AAE7, peroxisomal protein
Medtr6g084770	12.111	22.4629	1.75916	0.0783139	-3.67459	0.0425247	0.830306	6	31889040	31891162	+	1794	Medtr6g084770	GO:0004497;GO:0004497;GO:0005506;GO:0005506;GO:0016020;GO:0016021;GO:0016021;GO:0016491;GO:0016705;GO:0016705;GO:0020037;GO:0020037;GO:0046872;GO:0055114;GO:0055114;GO:0055114;	-	-	25496866	cytochrome P450 family 71 protein
Medtr8g028500	47.9212	67.3639	28.4786	0.422757	-1.2421	0.0434149	0.841024	8	10848011	10860059	+	6945	Medtr8g028500	GO:0043531;GO:0043531;	-	-	25500815	Rpp4C1
Medtr6g012590	7.21189	11.6949	2.7289	0.233341	-2.09949	0.0435091	0.841061	6	3842747	3847217	-	1350	Medtr6g012590	GO:0003676;GO:0003676;GO:0003723;GO:0003723;	K14948	-	11414914	polypyrimidine tract-binding-like protein
Medtr4g109220	23.6073	32.3163	14.8982	0.461014	-1.11712	0.0435589	0.841061	4	45318293	45320596	+	2304	Medtr4g109220	GO:0005516;GO:0005516;	-	-	25493859	plant calmodulin-binding-like protein
Medtr5g083430	2.17399	4.34799	0	0	-Inf	0.0443045	0.843507	5	36016698	36017662	+	555	Medtr5g083430	GO:0016491;GO:0016491;GO:0055114;	K15095	[EC:1.1.1.208]	11434542	short chain dehydrogenase/reductase
Medtr4g053530	2.16242	4.32483	0	0	-Inf	0.0447268	0.845777	4	19342499	19346920	+	2779	Medtr4g053530	GO:0003677;GO:0003950;GO:0003950;GO:0003950;GO:0005634;GO:0006471;GO:0006471;GO:0016740;GO:0016757;	K10798	[EC:2.4.2.30]	11444603	poly(ADP-ribose) polymerase domain protein
Medtr2g072250	7.66227	12.1752	3.14933	0.258667	-1.95083	0.045325	0.851378	2	30381481	30385408	+	1743	Medtr2g072250	GO:0004497;GO:0004497;GO:0005506;GO:0005506;GO:0016020;GO:0016021;GO:0016021;GO:0016491;GO:0016705;GO:0016705;GO:0020037;GO:0020037;GO:0046872;GO:0055114;GO:0055114;GO:0055114;	-	-	25487123	cytochrome P450 family 709 protein
Medtr7g081270	2.14409	4.28817	0	0	-Inf	0.0454076	0.852031	7	31008262	31009132	-	871	Medtr7g081270	GO:0003690;GO:0003690;GO:0006355;GO:0006355;GO:0009507;GO:0009507;GO:0016556;GO:0042646;GO:0042646;GO:0071472;GO:0071472;	K15032	-	11442578	transcription termination factor family protein
Medtr1g029500	26.548	36.0912	17.0048	0.471162	-1.08571	0.0456464	0.853015	1	10130817	10133328	-	1309	Medtr1g029500	GO:0005515;	K03875	-	25482432	F-box SKP2A-like protein
Medtr3g026020	13.9451	20.3584	7.53181	0.369961	-1.43455	0.0457627	0.853015	3	7946923	7948849	+	863	Medtr3g026020	GO:0009535;GO:0009658;GO:0016020;GO:0016021;GO:0016021;	-	-	11445773	plant/F13G24-250 protein
Medtr1g072540	13.5335	19.844	7.22309	0.363994	-1.45801	0.0458155	0.853015	1	32189148	32190638	+	1491	Medtr1g072540	GO:0008033;GO:0008033;GO:0009691;GO:0009824;GO:0016740;GO:0016740;GO:0052622;GO:0052623;	K10760	-	11420809	adenylate isopentenyltransferase
Medtr2g022430	26.6975	36.1219	17.2731	0.478189	-1.06435	0.0459937	0.854565	2	7745614	7747056	-	1443	Medtr2g022430	GO:0004190;GO:0004190;GO:0006508;GO:0006508;	-	-	25486099	xyloglucanase-specific endoglucanase inhibitor protein
Medtr0186s0030	6.01765	9.98016	2.05513	0.205922	-2.27983	0.0465129	0.860947	scaffold0186	7735	9506	-	955	Medtr0186s0030	GO:0005515;GO:0016740;GO:0016740;	K00799	[EC:2.5.1.18]	25480581	glutathione S-transferase, amino-terminal domain protein
Medtr1g045510	87.5385	122.186	52.8915	0.432879	-1.20797	0.0470378	0.864357	1	17072567	17075712	+	1547	Medtr1g045510	GO:0003676;GO:0003676;GO:0003723;GO:0003729;GO:0019344;	-	-	11434981	RNA-binding (RRM/RBD/RNP motif) family protein
Medtr2g088860	12.0638	17.8183	6.3092	0.354085	-1.49783	0.0471762	0.86451	2	37474092	37475502	-	966	Medtr2g088860	GO:0000079;GO:0000079;GO:0000079;GO:0010440;GO:0019901;GO:0019901;GO:0019901;	-	-	11413228	cyclin p4
Medtr4g125700	59.3168	79.9673	38.6663	0.483526	-1.04834	0.0475242	0.867692	4	52164881	52166971	+	2091	Medtr4g125700	GO:0004795;GO:0005829;GO:0006520;GO:0006520;GO:0009507;GO:0009570;GO:0030170;GO:0030170;	K01733	[EC:4.2.3.1]	25494197	threonine synthase-like protein
Medtr1g050495	6.57879	10.7528	2.40476	0.22364	-2.16075	0.0478564	0.872905	1	19488986	19490777	+	1792	Medtr1g050495	GO:0005515;	-	-	25483258	pentatricopeptide (PPR) repeat protein
Medtr4g055580	6.56467	10.7351	2.39422	0.223027	-2.16471	0.0480477	0.875007	4	20277298	20280782	-	1980	Medtr4g055580	GO:0005515;	-	-	11421855	F-box/RNI/FBD-like domain protein
Medtr7g021010	52.5636	72.9809	32.1463	0.440476	-1.18287	0.048072	0.875007	7	6580663	6583753	+	1656	Medtr7g021010	GO:0003677;GO:0003677;GO:0003677;GO:0003700;GO:0003700;GO:0005634;GO:0005634;GO:0006351;GO:0006355;GO:0006355;GO:0003677;GO:0003677;GO:0003677;GO:0003700;GO:0003700;GO:0005634;GO:0005634;GO:0006351;GO:0006355;GO:0006355;	-	-	11438832	ethylene response factor
Medtr4g016720	3.06847	6.13694	0	0	-Inf	0.0482219	0.875968	4	5127680	5132156	+	1371	Medtr4g016720	GO:0005773;GO:0005774;GO:0005774;GO:0006811;GO:0006812;GO:0006812;GO:0006816;GO:0006816;GO:0006816;GO:0008324;GO:0008324;GO:0015297;GO:0015369;GO:0015369;GO:0015369;GO:0016020;GO:0016021;GO:0016021;GO:0016021;GO:0055085;GO:0055085;GO:0070588;	K07300	-	11422478	vacuolar cation/proton exchanger 3
Medtr5g024450	10.029	15.2934	4.76468	0.311552	-1.68246	0.0486341	0.880933	5	9835249	9838931	-	3463	Medtr5g024450	GO:0000166;GO:0004672;GO:0004672;GO:0004674;GO:0004674;GO:0005515;GO:0005524;GO:0005524;GO:0005524;GO:0006468;GO:0006468;GO:0016020;GO:0016021;GO:0016021;GO:0016301;GO:0016310;GO:0016740;	-	-	11426285	LRR receptor-like kinase family protein
Medtr7g033680	14.9028	23.2351	6.57041	0.282779	-1.82225	0.0490254	0.884234	7	12266660	12271526	-	473	Medtr7g033680	-	-	-	25497933	hypothetical protein
Medtr6g015765	13.4642	20.4516	6.47679	0.316689	-1.65886	0.0492403	0.885639	6	5438932	5439487	+	556	Medtr6g015765	-	-	-	25495405	TIR-NBS-LRR RCT1-like resistance protein, putative
Medtr6g023070	16.6141	23.6219	9.6063	0.406669	-1.29807	0.0496883	0.889865	6	8021152	8023856	+	1830	Medtr6g023070	GO:0005515;	-	-	11416010	ankyrin repeat protein
Medtr1g111240	273.011	47.0361	498.986	10.6086	3.40716	1.86582e-19	4.73488e-15	1	50239925	50242309	+	1923	Medtr1g111240	GO:0004497;GO:0004497;GO:0005506;GO:0005506;GO:0016020;GO:0016021;GO:0016021;GO:0016491;GO:0016705;GO:0016705;GO:0020037;GO:0020037;GO:0046872;GO:0055114;GO:0055114;GO:0055114;	K00487	[EC:1.14.14.91]	25485521	cytochrome P450 family cinnamate 4-hydroxylase
Medtr6g092620	123.514	36.8422	210.185	5.70501	2.51223	9.57896e-14	1.21543e-09	6	34878493	34880015	+	1185	Medtr6g092620	GO:0009693;GO:0009815;GO:0009815;GO:0010089;GO:0016491;GO:0016491;GO:0016491;GO:0044036;GO:0046872;GO:0046872;GO:0055114;GO:0055114;GO:0055114;	K05933	[EC:1.14.17.4]	11435929	1-aminocyclopropane-1-carboxylate oxidase
Medtr2g437380	225.129	68.688	381.57	5.55513	2.47382	1.62381e-12	1.37358e-08	2	14666094	14668477	+	1856	Medtr2g437380	GO:0008168;GO:0016491;GO:0016491;GO:0016491;GO:0032259;GO:0046872;GO:0046872;GO:0055114;GO:0055114;GO:0055114;GO:0102803;GO:0102805;GO:0016491;GO:0016491;GO:0016491;GO:0046872;GO:0046872;GO:0055114;GO:0055114;GO:0055114;	-	-	25488175	2OG-Fe(II) oxygenase family oxidoreductase
Medtr4g088900	117.077	45.2621	188.892	4.17329	2.06118	1.1393e-09	5.78242e-06	4	35502243	35504138	+	826	Medtr4g088900	GO:0003677;GO:0003700;GO:0003700;GO:0005634;GO:0005634;GO:0005634;GO:0006355;GO:0006355;GO:0043565;GO:0043565;	K09419	-	25493174	heat shock transcription factor
Medtr1g100627	78.8562	27.4234	130.289	4.75102	2.24824	2.02557e-09	6.90002e-06	1	45547838	45552041	-	1837	Medtr1g100627	GO:0009737;GO:0009737;	-	-	25485072	hypothetical protein
Medtr4g124040	2538.98	1430.72	3647.24	2.54924	1.35007	2.29519e-08	5.8245e-05	4	51195926	51202969	+	4002	Medtr4g124040	GO:0000166;GO:0005524;GO:0005524;GO:0005524;GO:0016020;GO:0016021;GO:0016021;GO:0016021;GO:0016887;GO:0016887;GO:0042626;GO:0042626;GO:0055085;GO:0055085;GO:0000166;GO:0005524;GO:0005524;GO:0005524;GO:0006855;GO:0008559;GO:0016020;GO:0016021;GO:0016021;GO:0016021;GO:0016787;GO:0016887;GO:0016887;GO:0042626;GO:0042626;GO:0042908;GO:0055085;GO:0055085;GO:0000166;GO:0005524;GO:0005524;GO:0005524;GO:…	K05658	[EC:7.6.2.2]	11418583	ABC transporter B family protein
Medtr2g035405	450.121	238.084	662.159	2.7812	1.47571	3.11342e-08	6.58411e-05	2	15130281	15135021	-	3243	Medtr2g035405	GO:0005783;GO:0006145;GO:0010136;GO:0016787;GO:0016787;GO:0016787;GO:0016813;GO:0016813;GO:0047652;GO:0047652;GO:0047652;GO:0016787;GO:0016787;GO:0016787;GO:0016813;GO:0016813;GO:0016787;GO:0016787;GO:0016787;GO:0016813;GO:0016813;	K02083	[EC:3.5.3.9]	25486381	allantoate amidohydrolase
Medtr7g102460	28.018	5.33637	50.6996	9.50076	3.24804	3.96968e-08	7.74913e-05	7	41516988	41518754	+	1767	Medtr7g102460	GO:0016740;GO:0016757;GO:0016758;GO:0016758;	K13496	[EC:2.4.1.-]	11435265	UDP-glucosyltransferase family protein
Medtr5g037350	366.583	194.679	538.487	2.76602	1.46781	4.8426e-08	8.7779e-05	5	16347397	16352334	-	1725	Medtr5g037350	GO:0003746;GO:0003746;GO:0003924;GO:0003924;GO:0005525;GO:0005525;GO:0006414;	K03231	-	11413718	elongation factor 1-alpha
Medtr7g104460	579.345	322.101	836.589	2.59729	1.37701	7.96109e-08	0.00012123	7	42324235	42325767	-	1009	Medtr7g104460	GO:0003712;GO:0003712;GO:0005773;GO:0009910;GO:0009910;GO:0031982;GO:0090344;GO:1903506;	-	-	11436357	terminal flower 1
Medtr7g016720	158.321	62.1852	254.456	4.09191	2.03277	8.12118e-08	0.00012123	7	5288687	5290376	-	1529	Medtr7g016720	GO:0003824;GO:0003824;GO:0009058;GO:0009058;GO:0016740;GO:0016746;GO:0016746;GO:0016746;GO:0016747;GO:0016747;	K00660	[EC:2.3.1.74]	11418796	chalcone and stilbene synthase family protein
Medtr7g062150	111.398	48.9542	173.842	3.55111	1.82827	3.47075e-07	0.000400351	7	22557844	22561544	-	2464	Medtr7g062150	GO:0016311;GO:0016787;GO:0016787;GO:0016787;GO:0033883;GO:0016787;GO:0016787;	K07025	-	25498498	haloacid dehalogenase-like hydrolase
Medtr7g016800	55.6453	20.9998	90.2908	4.29961	2.10421	6.1323e-07	0.000622477	7	5309596	5311403	+	1383	Medtr7g016800	GO:0003824;GO:0003824;GO:0009058;GO:0009058;GO:0016210;GO:0016740;GO:0016746;GO:0016746;GO:0016746;GO:0016747;GO:0016747;	K00660	[EC:2.3.1.74]	11420610	chalcone and stilbene synthase family protein
Medtr6g005630	49.3664	18.1843	80.5485	4.42956	2.14716	6.73844e-07	0.000657698	6	863153	867302	+	1783	Medtr6g005630	GO:0004650;GO:0004650;GO:0004650;GO:0005576;GO:0005576;GO:0005975;GO:0005975;GO:0008152;GO:0016787;GO:0016798;GO:0071555;GO:0071555;GO:0071555;GO:0004650;GO:0004650;GO:0005576;GO:0005576;GO:0005975;GO:0005975;GO:0008152;GO:0016787;GO:0016798;GO:0071555;GO:0071555;	K01184	[EC:3.2.1.15]	11423776	polygalacturonase
Medtr7g103300	378.456	217.256	539.657	2.48397	1.31265	7.46798e-07	0.000680685	7	41774690	41778376	+	2793	Medtr7g103300	GO:0016020;GO:0016021;GO:0016021;GO:0016021;GO:0016020;GO:0016021;GO:0016021;GO:0016021;GO:0016020;GO:0016021;GO:0016021;GO:0016021;GO:0016020;GO:0016021;GO:0016021;GO:0016021;GO:0016020;GO:0016021;GO:0016021;GO:0016021;GO:0016020;GO:0016021;GO:0016021;GO:0016021;	-	-	25499364	sulfite exporter TauE/SafE family protein
Medtr2g435490	1357.56	825.464	1889.66	2.2892	1.19485	9.66636e-07	0.000791301	2	13713148	13713958	+	811	Medtr2g435490	GO:0005576;GO:0005576;	K13449	-	25488053	CAP, cysteine-rich secretory protein, antigen 5
Medtr4g029020	847.501	498.013	1196.99	2.40353	1.26515	1.40439e-06	0.00107998	4	9994106	9995503	-	1398	Medtr4g029020	GO:0000166;GO:0004672;GO:0004672;GO:0004674;GO:0004674;GO:0005524;GO:0005524;GO:0005524;GO:0006468;GO:0006468;GO:0007165;GO:0007165;GO:0016301;GO:0016310;GO:0016740;	K07198	[EC:2.7.11.11]	25491713	CBL-interacting kinase
Medtr2g097900	224.204	125.151	323.258	2.58295	1.36902	2.03041e-06	0.00150739	2	41818492	41823247	-	3164	Medtr2g097900	GO:0006855;GO:0006855;GO:0015238;GO:0015238;GO:0015297;GO:0015297;GO:0016020;GO:0016020;GO:0016020;GO:0016021;GO:0016021;GO:0019761;GO:0055085;GO:0055085;GO:0006855;GO:0006855;GO:0015238;GO:0015238;GO:0015297;GO:0015297;GO:0016020;GO:0016020;GO:0016020;GO:0016021;GO:0016021;GO:0055085;GO:0055085;	-	-	11422671	aluminum-activated citrate transporter
Medtr1g073760	60.1148	25.2102	95.0194	3.76908	1.91421	2.079e-06	0.00150739	1	32731874	32736073	+	3051	Medtr1g073760	-	-	-	25484393	DUF810 family protein
Medtr1g080590	78.6913	36.32	121.063	3.33323	1.73692	2.23269e-06	0.00157386	1	35836013	35838257	-	1696	Medtr1g080590	GO:0003713;GO:0003713;GO:0009955;GO:0009965;GO:0048481;GO:1903508;	-	-	11409518	GRF1-interacting factor-like protein
Medtr8g011780	213.912	113.76	314.064	2.76077	1.46507	2.47493e-06	0.00169747	8	3227386	3229181	-	1695	Medtr8g011780	GO:0004672;GO:0004672;GO:0005524;GO:0005524;GO:0006468;GO:0006468;GO:0016301;GO:0016310;GO:0016740;	K20714	[EC:2.7.11.1]	11428596	Serine/Threonine-kinase OXI1-like protein
Medtr8g098930	257.005	147.037	366.974	2.49579	1.3195	3.03202e-06	0.00199404	8	41419293	41422107	-	1976	Medtr8g098930	GO:0003824;GO:0003824;GO:0006979;GO:0009058;GO:0009058;GO:0009611;GO:0009612;GO:0009733;GO:0009753;GO:0010087;GO:0016829;GO:0016847;GO:0016847;GO:0030170;GO:0030170;GO:0042218;GO:0042802;GO:0051301;GO:0071281;	K20772	[EC:4.4.1.14]	25502108	1-aminocyclopropane-1-carboxylate synthase
Medtr1g056910	93.7429	45.9556	141.53	3.07971	1.6228	4.27662e-06	0.00266513	1	24920395	24921825	-	1431	Medtr1g056910	GO:0004842;GO:0004842;GO:0016567;GO:0016567;GO:0016567;GO:0016740;GO:0016746;GO:0016874;GO:0016874;	-	-	25483691	E3 ubiquitin-protein ligase PUB23-like protein
Medtr7g096880	34.6319	11.8309	57.4329	4.85447	2.27932	4.30587e-06	0.00266513	7	38891806	38894690	+	2885	Medtr7g096880	GO:0005315;GO:0005315;GO:0006817;GO:0006817;GO:0015415;GO:0016020;GO:0016021;GO:0016021;GO:0016021;GO:0016787;GO:0022857;GO:0022857;GO:0035435;GO:0055085;GO:0055085;GO:0099133;	K08176	-	25499257	high affinity inorganic phosphate transporter
Medtr4g055310	321.711	190.34	453.082	2.38038	1.25119	5.13744e-06	0.00303193	4	20136633	20138701	+	2069	Medtr4g055310	GO:0004664;GO:0004664;GO:0008652;GO:0009073;GO:0009094;GO:0009094;GO:0009094;GO:0009507;GO:0009536;GO:0009570;GO:0009570;GO:0016829;GO:0047769;GO:0047769;	K05359	-	11418773	arogenate/prephenate dehydratase
Medtr7g106050	518.456	316.545	720.367	2.27572	1.18632	5.39718e-06	0.00311282	7	43076086	43077352	-	1267	Medtr7g106050	GO:0016020;GO:0016021;GO:0016021;	-	-	25499471	late embryogenesis abundant hydroxyproline-rich glycoprotein
Medtr7g072470	79.3481	26.2829	132.413	5.03801	2.33285	7.44614e-06	0.00401058	7	26944601	26947376	+	890	Medtr7g072470	-	-	-	11442077	transcription factor bHLH93-like protein
Medtr5g020060	46.3017	16.1683	76.4351	4.72746	2.24107	7.58591e-06	0.00401058	5	7645478	7646932	-	864	Medtr5g020060	-	-	-	11405634	plant/MUD21-2 protein
Medtr8g099350	117.103	62.3178	171.887	2.75823	1.46374	9.37665e-06	0.00448965	8	41853261	41854576	-	1086	Medtr8g099350	GO:0003677;GO:0003700;GO:0003700;GO:0005634;GO:0005634;GO:0006355;GO:0006355;GO:0043565;GO:0043565;	-	-	25502169	WRKY family transcription factor
Medtr1g076370	31.7703	10.8544	52.6862	4.85391	2.27915	1.25036e-05	0.00549283	1	34015660	34017853	-	2194	Medtr1g076370	GO:0000166;GO:0004672;GO:0004672;GO:0004674;GO:0004674;GO:0005524;GO:0005524;GO:0005524;GO:0006468;GO:0006468;GO:0007165;GO:0007165;GO:0016301;GO:0016310;GO:0016740;	K12761	[EC:2.7.11.1]	25484465	CBL-interacting kinase
Medtr1g097935	572.003	358.731	785.276	2.18904	1.1303	1.25041e-05	0.00549283	1	44140688	44142315	+	1506	Medtr1g097935	GO:0003824;GO:0003824;GO:0009058;GO:0009058;GO:0016210;GO:0016740;GO:0016746;GO:0016746;GO:0016746;GO:0016747;GO:0016747;	K00660	[EC:2.3.1.74]	25485043	chalcone and stilbene synthase family protein
Medtr4g094715	353.832	216.373	491.292	2.27058	1.18306	1.25541e-05	0.00549283	4	38832640	38835379	+	1806	Medtr4g094715	GO:0004650;GO:0004650;GO:0004650;GO:0005576;GO:0005576;GO:0005975;GO:0005975;GO:0008152;GO:0016787;GO:0016798;GO:0016829;GO:0016829;GO:0071555;GO:0071555;	-	-	25493429	pectin lyase superfamily protein
Medtr7g106830	26.453	8.09473	44.8113	5.53586	2.46881	1.37563e-05	0.00591686	7	43513083	43516177	-	1654	Medtr7g106830	GO:0003824;GO:0003824;GO:0008483;GO:0008483;GO:0009058;GO:0009058;GO:0016740;GO:0030170;GO:0030170;	K15849	-	25499524	aspartate aminotransferase
Medtr1g014320	154.364	75.8919	232.835	3.06799	1.61729	1.51651e-05	0.00641406	1	3005984	3010195	+	1709	Medtr1g014320	GO:0008886;GO:0016491;GO:0016491;GO:0016491;GO:0016620;GO:0016620;GO:0055114;GO:0055114;GO:0055114;	K00131	[EC:1.2.1.9]	11423304	NADP-dependent glyceraldehyde-3-phosphate dehydrogenase
Medtr4g120950	27.4558	7.26136	47.6502	6.56217	2.71417	2.05005e-05	0.00839098	4	50072677	50073866	-	677	Medtr4g120950	GO:0006952;GO:0006952;GO:0006952;GO:0009607;GO:0009607;GO:0009736;GO:0009736;GO:0009877;GO:0009877;	-	-	25494100	Pathogenesis-related protein bet V I family protein [Source:UniProtKB/TrEMBL;Acc:A0A072USL1]
Medtr7g016820	143.034	63.2395	222.828	3.52356	1.81703	2.40013e-05	0.00938468	7	5314377	5316167	+	1469	Medtr7g016820	GO:0003824;GO:0003824;GO:0009058;GO:0009058;GO:0016210;GO:0016740;GO:0016746;GO:0016746;GO:0016746;GO:0016747;GO:0016747;	K00660	[EC:2.3.1.74]	11420611	chalcone and stilbene synthase family protein
Medtr5g005480	46.493	20.0147	72.9714	3.6459	1.86627	2.40377e-05	0.00938468	5	469087	474491	-	2268	Medtr5g005480	GO:0004672;GO:0004672;GO:0005524;GO:0005524;GO:0006468;GO:0006468;GO:0016020;GO:0016021;GO:0016021;GO:0016301;GO:0016310;GO:0016740;	-	-	11439593	cysteine-rich receptor-kinase-like protein
Medtr5g026740	173.705	101.026	246.383	2.4388	1.28617	2.73857e-05	0.00999915	5	11040134	11042699	-	934	Medtr5g026740	GO:0000062;GO:0000062;GO:0001666;GO:0005829;GO:0005886;GO:0006869;GO:0009646;GO:0019344;GO:0031210;GO:0031210;GO:0050826;	K08762	-	11407899	acyl-CoA-binding domain protein
Medtr1g098140	416.788	251.655	581.921	2.31237	1.20937	2.88526e-05	0.0101693	1	44127878	44129689	+	1690	Medtr1g098140	GO:0003824;GO:0003824;GO:0009058;GO:0009058;GO:0016210;GO:0016740;GO:0016746;GO:0016746;GO:0016746;GO:0016747;GO:0016747;	K00660	[EC:2.3.1.74]	11407003	chalcone and stilbene synthase family protein
Medtr2g039620	124.608	64.9936	184.222	2.83446	1.50307	3.7959e-05	0.0122714	2	17355333	17360530	+	2079	Medtr2g039620	GO:0003677;GO:0003677;GO:0006355;GO:0006355;GO:0046983;GO:0046983;GO:0003677;GO:0003677;GO:0006355;GO:0006355;GO:0046983;GO:0046983;	-	-	11445448	basic helix loop helix (BHLH) DNA-binding family protein
Medtr4g075150	302.738	135.215	470.261	3.47788	1.79821	3.89402e-05	0.0123523	4	28685986	28692813	+	2157	Medtr4g075150	GO:0004180;GO:0004185;GO:0004185;GO:0004185;GO:0005773;GO:0006508;GO:0006508;GO:0006508;GO:0008233;GO:0009505;GO:0016787;GO:0004180;GO:0004185;GO:0004185;GO:0004185;GO:0006508;GO:0006508;GO:0006508;GO:0008233;GO:0016787;	K16297	[EC:3.4.16.-]	11443645	serine carboxypeptidase-like protein
Medtr7g079080	107.292	37.439	177.146	4.73158	2.24232	3.96081e-05	0.0124091	7	29963156	29966691	-	2122	Medtr7g079080	GO:0003824;GO:0003824;GO:0009058;GO:0009058;GO:0016829;GO:0016847;GO:0030170;GO:0030170;GO:0042218;GO:0003824;GO:0003824;GO:0009058;GO:0009058;GO:0030170;GO:0030170;	K20772	[EC:4.4.1.14]	11426537	1-aminocyclopropane-1-carboxylate synthase
Medtr4g011790	787.282	515.925	1058.64	2.05193	1.03698	4.11645e-05	0.0127394	4	2975966	2984037	+	2594	Medtr4g011790	GO:0003824;GO:0003824;GO:0003824;GO:0003824;GO:0003824;GO:0003824;	K18660	[EC:6.2.1.-]	25491371	fatty acyl-CoA synthetase family protein
Medtr4g088160	497.964	251.559	744.369	2.95902	1.56512	4.37193e-05	0.0132079	4	34754100	34756270	-	1928	Medtr4g088160	GO:0004497;GO:0004497;GO:0005506;GO:0005506;GO:0016491;GO:0016705;GO:0016705;GO:0020037;GO:0020037;GO:0046872;GO:0055114;GO:0055114;GO:0055114;	K13257	[EC:1.14.14.87]	25493067	cytochrome P450 family flavone synthase
Medtr5g020800	266.707	149.765	383.648	2.56166	1.35708	4.85578e-05	0.0141638	5	7965936	7967985	+	1511	Medtr5g020800	GO:0016491;GO:0047526;GO:0055114;	K23050	[EC:1.3.1.-]	11410094	isoflavone reductase-like protein
Medtr5g005450	32.5348	12.3922	52.6773	4.25084	2.08775	4.93226e-05	0.0142234	5	453088	457181	-	2244	Medtr5g005450	GO:0004672;GO:0004672;GO:0005524;GO:0005524;GO:0006468;GO:0006468;GO:0016020;GO:0016021;GO:0016021;GO:0016301;GO:0016310;	K04733	[EC:2.7.11.1]	11442717	cysteine-rich receptor-kinase-like protein
Medtr7g080460	37.2042	15.5449	58.8635	3.78669	1.92094	5.18904e-05	0.0147958	7	30617123	30621534	-	2736	Medtr7g080460	GO:0003677;GO:0003677;GO:0003677;GO:0003700;GO:0003700;GO:0005634;GO:0005634;GO:0006351;GO:0006355;GO:0006355;	K09285	-	11435545	AP2-like ethylene-responsive transcription factor
Medtr4g070430	2693.24	1261.72	4124.76	3.26915	1.70891	5.46699e-05	0.0152457	4	26540606	26545426	-	2860	Medtr4g070430	GO:0000166;GO:0005524;GO:0005524;GO:0005978;GO:0005978;GO:0008878;GO:0008878;GO:0008878;GO:0009058;GO:0009058;GO:0009507;GO:0009507;GO:0009536;GO:0016740;GO:0016779;GO:0016779;GO:0016779;GO:0019252;GO:0019252;GO:0019252;GO:0000166;GO:0005524;GO:0005524;GO:0005978;GO:0005978;GO:0008878;GO:0008878;GO:0008878;GO:0009058;GO:0009058;GO:0009507;GO:0009507;GO:0009536;GO:0016740;GO:0016779;GO:0016779;GO:…	K00975	[EC:2.7.7.27]	11417144	glucose-1-phosphate adenylyltransferase family protein
Medtr5g077510	248.124	153.438	342.809	2.23419	1.15975	6.0616e-05	0.0161921	5	33088722	33090476	+	1755	Medtr5g077510	GO:0004842;GO:0004842;GO:0016567;GO:0016567;GO:0016567;GO:0016740;GO:0016746;GO:0016874;	-	-	11433644	Avr9/Cf-9 rapidly elicited protein
Medtr1g036460	261.035	78.3971	443.673	5.6593	2.50062	6.95409e-05	0.0176325	1	13381789	13385298	-	1323	Medtr1g036460	GO:0008168;GO:0008168;GO:0008168;GO:0008171;GO:0008171;GO:0016740;GO:0032259;GO:0046983;GO:0046983;	K13066	[EC:2.1.1.68]	25482765	caffeic acid O-methyltransferase
Medtr7g101395	365.681	224.446	506.916	2.25852	1.17538	6.96229e-05	0.0176325	7	40942826	40946044	+	2588	Medtr7g101395	GO:0003824;GO:0003824;GO:0005737;GO:0005737;GO:0005737;GO:0006559;GO:0006559;GO:0009698;GO:0009800;GO:0009800;GO:0016829;GO:0016841;GO:0016841;GO:0045548;GO:0045548;	K10775	[EC:4.3.1.24]	25499316	phenylalanine ammonia-lyase-like protein
Medtr5g007640	1615.97	916.257	2315.67	2.52732	1.33761	7.01772e-05	0.0176325	5	1444145	1450200	+	2052	Medtr5g007640	GO:0003824;GO:0003824;GO:0009698;GO:0009718;GO:0010584;GO:0016207;GO:0016874;GO:0016874;	K01904	[EC:6.2.1.12]	11426040	4-coumarate:CoA ligase-like protein
Medtr4g087730	356.052	226.388	485.717	2.14551	1.10132	7.12167e-05	0.0177183	4	34515354	34520486	+	1095	Medtr4g087730	-	-	-	11443462	Pmr5/Cas1p GDSL/SGNH-like acyl-esterase family protein
Medtr7g023690	112.277	45.6728	178.882	3.9166	1.9696	7.51613e-05	0.0185181	7	7739073	7740066	-	994	Medtr7g023690	GO:0005515;	-	-	11437801	polygalacturonase inhibitor protein
Medtr5g059140	18.0058	4.86498	31.1467	6.40223	2.67857	0.000101344	0.0225597	5	24404215	24409901	+	1415	Medtr5g059140	GO:0016491;GO:0016491;GO:0016491;GO:0046872;GO:0046872;GO:0055114;GO:0055114;GO:0055114;	K05278	[EC:1.14.20.6]	11435414	flavonol synthase/flavanone 3-hydroxylase
Medtr5g048670	13.4613	0.899943	26.0226	28.9159	4.85379	0.000116702	0.0257526	5	21286770	21289896	-	1282	Medtr5g048670	GO:0003677;GO:0003677;GO:0005634;GO:0005634;GO:0006260;GO:0006260;	-	-	25494683	replication factor-A protein 1, amino-terminal domain protein
Medtr4g035330	139.503	72.7313	206.276	2.83614	1.50393	0.000125743	0.0270366	4	12151050	12156251	-	1764	Medtr4g035330	GO:0004497;GO:0004497;GO:0005506;GO:0005506;GO:0016491;GO:0016705;GO:0016705;GO:0020037;GO:0020037;GO:0046872;GO:0055114;GO:0055114;GO:0055114;	-	-	11425754	cytochrome P450 family 81 protein
Medtr1g111510	77.7012	42.7501	112.652	2.63513	1.39788	0.000126396	0.0270366	1	50384418	50386469	+	2052	Medtr1g111510	GO:0016020;GO:0016021;GO:0016021;	-	-	25485541	MFS transporter
Medtr3g467430	45.8835	22.141	69.626	3.14467	1.65291	0.000144453	0.0293263	3	27824358	27826866	+	1051	Medtr3g467430	GO:0004364;GO:0005515;GO:0016740;GO:0016740;	K00799	[EC:2.5.1.18]	25491098	glutathione S-transferase, amino-terminal domain protein
Medtr1g015890	49.001	24.2817	73.7204	3.03605	1.6022	0.000162133	0.0323973	1	4108971	4109792	+	822	Medtr1g015890	GO:0005623;GO:0005623;GO:0009055;GO:0009055;GO:0015035;GO:0015035;GO:0016491;GO:0022900;GO:0045174;GO:0045454;GO:0045454;GO:0055114;GO:0098869;	K03676	-	11414510	glutaredoxin-like protein, putative
Medtr1g046480	58.6171	30.745	86.4892	2.81311	1.49217	0.000167054	0.032863	1	17517299	17521651	+	2035	Medtr1g046480	GO:0016020;GO:0016020;GO:0016020;GO:0016021;GO:0016021;	-	-	25483058	TMS membrane protein/tumor differentially protein
Medtr3g114530	46.1102	20.5555	71.6649	3.48641	1.80174	0.000178463	0.0338634	3	53474287	53479272	+	1919	Medtr3g114530	GO:0005622;GO:0005623;GO:0016491;GO:0035556;GO:0035556;GO:0045454;GO:0045454;GO:0055114;	K17609	[EC:1.8.1.8]	11442519	nucleoredoxin, putative
Medtr7g070250	127.447	77.9493	176.945	2.27	1.18269	0.000191433	0.0358236	7	25917861	25920322	-	676	Medtr7g070250	GO:0016853;	-	-	11415714	macrophage migration inhibition factor-like protein
Medtr5g013910	124.246	75.4719	173.02	2.2925	1.19692	0.000191985	0.0358236	5	4586290	4588726	+	1178	Medtr5g013910	GO:0005829;GO:0005829;GO:0005886;GO:0005886;GO:0016311;GO:0016787;GO:0016787;GO:0016787;GO:0050308;GO:0050308;GO:0050309;	-	-	11439431	haloacid dehalogenase-like hydrolase
Medtr2g035170	5673.28	3647.36	7699.21	2.1109	1.07786	0.000213137	0.0392935	2	13519529	13521345	+	1371	Medtr2g035170	GO:0006952;GO:0006952;	-	-	11420052	disease-resistance response protein
Medtr6g043700	105.076	49.2777	160.875	3.26467	1.70694	0.000213678	0.0392935	6	13228759	13230010	-	730	Medtr6g043700	GO:0016829;GO:0016829;GO:0030246;	-	-	11441134	alginate lyase
Medtr8g027345	339.801	180.216	499.387	2.77104	1.47043	0.000220982	0.0399615	8	9621235	9622899	+	1211	Medtr8g027345	GO:0003677;GO:0003677;GO:0003677;GO:0005634;	K09422	-	25500654	myb transcription factor
Medtr4g087925	49.1265	24.4777	73.7753	3.01398	1.59167	0.000234291	0.0415777	4	34604354	34607909	+	2951	Medtr4g087925	GO:0004970;GO:0004970;GO:0006811;GO:0016020;GO:0016020;GO:0016020;GO:0016021;GO:0016021;GO:0035235;	-	-	25493042	glutamate receptor 3.4
Medtr3g008470	36.0675	12.4675	59.6674	4.78582	2.25877	0.000238485	0.042028	3	1549360	1552930	+	2241	Medtr3g008470	GO:0016020;GO:0016021;GO:0016021;GO:0016021;	-	-	11417814	folate/biopterin transporter
Medtr8g099995	212.029	137.924	286.135	2.07459	1.05283	0.000253014	0.0436785	8	42357887	42361951	+	2145	Medtr8g099995	GO:0016491;GO:0055114;GO:0102339;GO:0102340;GO:0102341;GO:0102342;	K11153	[EC:1.1.1.300]	25502242	NAD(P)-binding rossmann-fold protein
Medtr8g042780	182.863	105.176	260.55	2.47728	1.30876	0.00028691	0.0477702	8	16525894	16530996	-	2107	Medtr8g042780	GO:0005215;GO:0005215;GO:0016020;GO:0016021;GO:0016021;GO:0016021;GO:0055085;GO:0055085;GO:0005215;GO:0005215;GO:0016020;GO:0016021;GO:0016021;GO:0016021;GO:0055085;GO:0055085;	-	-	25501126	zinc induced facilitator-like protein
Medtr2g080260	27.3446	11.2113	43.478	3.87806	1.95533	0.000331626	0.0528719	2	33878075	33879944	-	1546	Medtr2g080260	-	-	-	25487405	root cap/late embryogenesis-like protein
Medtr5g020760	344.891	218.832	470.95	2.15211	1.10575	0.000364974	0.0557948	5	7953059	7955273	+	1896	Medtr5g020760	GO:0016491;GO:0047526;GO:0055114;	K23050	[EC:1.3.1.-]	11412853	isoflavone reductase-like protein
Medtr5g090830	20.4151	7.18514	33.6451	4.68259	2.22731	0.000383258	0.05755	5	39552891	39554634	-	1652	Medtr5g090830	GO:0016740;GO:0016746;GO:0016747;GO:0016747;	-	-	11433007	HXXXD-type acyl-transferase family protein
Medtr2g022700	818.485	262.115	1374.86	5.24523	2.39101	0.000415735	0.0609833	2	7882308	7884424	+	1432	Medtr2g022700	GO:0016020;GO:0016021;GO:0016021;GO:0016021;GO:0022857;GO:0022857;GO:0055085;GO:0055085;	K15283	-	25486118	glucose-6-phosphate/phosphate translocator-like protein
Medtr7g073230	295.859	191.713	400.006	2.08649	1.06108	0.000423332	0.0617408	7	27342329	27346664	+	3433	Medtr7g073230	GO:0004672;GO:0004672;GO:0005524;GO:0005524;GO:0006468;GO:0006468;GO:0016301;GO:0016310;GO:0016740;	-	-	11432567	receptor-like kinase plant-like protein
Medtr3g087900	9.45234	1.56519	17.3395	11.0782	3.46965	0.000449408	0.064071	3	39839826	39840617	+	792	Medtr3g087900	GO:0016020;GO:0016021;GO:0016021;	K16282	[EC:2.3.2.27]	11417623	zinc finger, C3HC4 type (RING finger) protein
Medtr3g047140	15.8131	0.635338	30.9909	48.7787	5.60818	0.00047653	0.0664445	3	15665227	15666111	+	885	Medtr3g047140	GO:0030246;GO:0030246;GO:0030246;	-	-	11426365	legume lectin beta domain protein
Medtr8g069775	153.211	73.98	232.442	3.14196	1.65166	0.000480558	0.06664	8	29426353	29428952	+	1991	Medtr8g069775	GO:0005886;GO:0005886;GO:0015706;GO:0015706;GO:0016020;GO:0016021;GO:0016021;GO:0016021;GO:0055085;GO:0055085;	K02575	-	25501481	high affinity nitrate transporter 2.7
Medtr4g057765	48.5151	25.7714	71.2588	2.76504	1.4673	0.000515115	0.0699196	4	21268278	21270135	+	1443	Medtr4g057765	GO:0030001;GO:0030001;GO:0046872;GO:0046872;GO:0046872;	-	-	25492402	heavy metal transport/detoxification superfamily protein
Medtr0001s0660	1014.22	528.477	1499.97	2.83828	1.50502	0.000524396	0.0704106	scaffold0001	502647	507542	-	1405	Medtr0001s0660	GO:0008270;GO:0008270;GO:0016491;GO:0016491;GO:0046872;GO:0055114;GO:0055114;	K00121	-	25479300	zinc-binding alcohol dehydrogenase family protein
Medtr1g110570	124.488	77.8904	171.086	2.1965	1.13521	0.000586189	0.0756639	1	49891664	49892623	-	960	Medtr1g110570	-	-	-	11425408	VQ motif protein
Medtr6g464620	30.2356	13.697	46.7741	3.41492	1.77185	0.000615108	0.0772752	6	22552607	22554465	-	1507	Medtr6g464620	GO:0016491;GO:0016491;GO:0016491;GO:0046872;GO:0046872;GO:0047927;GO:0051213;GO:0055114;GO:0055114;GO:0055114;	K05282	[EC:1.14.11.12]	25497212	gibberellin 20-oxidase
Medtr1g045120	13.0262	3.49564	22.5567	6.45281	2.68993	0.000647081	0.0808914	1	16938999	16940663	+	895	Medtr1g045120	GO:0003993;GO:0003993;GO:0016311;	-	-	11421208	plant acid phosphatase
Medtr4g051515	70.7586	28.9065	112.611	3.89569	1.96188	0.00071572	0.0877431	4	18426005	18427533	-	1529	Medtr4g051515	GO:0004842;GO:0004842;GO:0016567;GO:0016567;GO:0016567;GO:0016740;GO:0016746;GO:0016874;GO:0016874;	-	-	25492197	E3 ubiquitin-protein ligase PUB23-like protein
Medtr4g098630	123.701	63.4221	183.98	2.90088	1.53649	0.000731937	0.088922	4	40651083	40652597	-	957	Medtr4g098630	GO:0003677;GO:0003677;GO:0003677;GO:0005634;GO:0005634;GO:0006355;GO:0006355;	-	-	11415472	NAC transcription factor-like protein
Medtr7g111500	19.5223	7.35912	31.6855	4.30561	2.10622	0.000732344	0.088922	7	45759008	45759682	-	675	Medtr7g111500	-	-	-	11432053	hypothetical protein
Medtr7g092600	18.542	4.33577	32.7483	7.55306	2.91706	0.000740758	0.0895153	7	36727608	36730862	+	1834	Medtr7g092600	GO:0004497;GO:0004497;GO:0005506;GO:0005506;GO:0016020;GO:0016021;GO:0016021;GO:0016491;GO:0016705;GO:0016705;GO:0020037;GO:0020037;GO:0046872;GO:0055114;GO:0055114;GO:0055114;	-	-	11437333	cytochrome P450 family protein
Medtr3g096310	97.9464	61.1038	134.789	2.2059	1.14137	0.000828487	0.094836	3	44013420	44018709	+	4344	Medtr3g096310	GO:0005458;GO:0016020;GO:0016021;GO:0016021;GO:0016020;GO:0016021;GO:0016021;GO:0016020;GO:0016021;GO:0016021;GO:0016020;GO:0016021;GO:0016021;	K15356	-	11434535	GDP-mannose transporter GONST1
Medtr2g081980	105.459	15.6072	195.311	12.5142	3.64549	0.000829458	0.094836	2	34448327	34451848	-	1686	Medtr2g081980	GO:0000287;GO:0000287;GO:0010333;GO:0010333;GO:0016829;GO:0016829;GO:0016829;GO:0046872;	-	-	11405529	terpene synthase family, metal-binding domain protein
Medtr5g073020	539.225	266.592	811.858	3.04532	1.60659	0.000937909	0.102592	5	31071402	31074005	-	1723	Medtr5g073020	GO:0004497;GO:0004497;GO:0005506;GO:0005506;GO:0016020;GO:0016021;GO:0016021;GO:0016491;GO:0016705;GO:0016705;GO:0020037;GO:0020037;GO:0046872;GO:0055114;GO:0055114;GO:0055114;	-	-	11426456	cytochrome P450 family 71 protein
Medtr1g090370	46.1777	24.9504	67.405	2.70156	1.43379	0.00103148	0.108614	1	40491958	40493342	+	763	Medtr1g090370	GO:0006351;GO:0006351;GO:0043565;GO:0043565;	-	-	11422351	transcription factor bZIP protein, putative
Medtr7g087570	935.618	569.544	1301.69	2.2855	1.19251	0.00105938	0.109784	7	34097403	34099544	-	1115	Medtr7g087570	GO:0004146;GO:0016491;GO:0016787;GO:0016787;GO:0055114;	-	-	11429020	serine hydrolase
Medtr5g016320	61.599	26.7751	96.4229	3.60121	1.84848	0.0010599	0.109784	5	5831425	5833952	-	2296	Medtr5g016320	-	K14487	-	11405444	indole-3-acetic acid-amido synthetase
Medtr7g071680	35.5502	18.146	52.9544	2.91824	1.5451	0.0011529	0.115186	7	26563673	26565284	+	1148	Medtr7g071680	GO:0010301;GO:0016491;GO:0055114;	-	-	11416993	short-chain dehydrogenase/reductase
Medtr7g074710	2809.39	1814.64	3804.15	2.09637	1.06789	0.00119059	0.117792	7	27943372	27945942	+	1355	Medtr7g074710	GO:0003824;GO:0003824;GO:0016491;GO:0050662;GO:0050662;GO:0055114;	K13265	[EC:1.1.1.348]	11435356	dihydroflavonol 4-reductase-like protein
Medtr4g119270	27.6226	12.9836	42.2615	3.25498	1.70265	0.00123018	0.12007	4	49385473	49386669	+	1197	Medtr4g119270	GO:0003677;GO:0003677;GO:0003677;GO:0003700;GO:0003700;GO:0005634;GO:0005634;GO:0006351;GO:0006355;GO:0006355;	-	-	11420233	ethylene response factor
Medtr4g076140	49.3108	27.878	70.7435	2.53761	1.34347	0.00125187	0.1216	4	29138995	29141367	+	2373	Medtr4g076140	GO:0003712;GO:0003712;GO:0005634;GO:0005634;GO:1903506;	-	-	11444939	GRAS family transcription factor
Medtr7g108890	101.542	65.5062	137.577	2.10021	1.07053	0.00127327	0.121931	7	44473733	44477030	-	2067	Medtr7g108890	GO:0004857;GO:0004857;GO:0005618;GO:0016787;GO:0030599;GO:0030599;GO:0030599;GO:0042545;GO:0042545;GO:0042545;GO:0043086;GO:0045330;GO:0045330;GO:0045490;GO:0045490;	K01051	[EC:3.1.1.11]	25499609	pectinesterase/pectinesterase inhibitor
Medtr7g113405	1898.41	1161.63	2635.19	2.26852	1.18175	0.0013052	0.12313	7	46706228	46707139	-	912	Medtr7g113405	GO:0003824;GO:0003824;GO:0009058;GO:0009058;GO:0016210;GO:0016740;GO:0016746;GO:0016746;GO:0016746;GO:0016747;GO:0016747;	K00660	[EC:2.3.1.74]	25499670	3-ketoacyl-CoA synthase-like protein
Medtr1g041285	373.966	235.201	512.73	2.17996	1.1243	0.00131845	0.123463	1	15350137	15352576	+	852	Medtr1g041285	GO:0005509;GO:0005509;	K13448	-	25482942	EF hand calcium-binding family protein
Medtr8g040860	137.467	75.5244	199.409	2.64033	1.40072	0.0013243	0.123554	8	15233661	15234653	-	993	Medtr8g040860	GO:0016787;GO:0016787;GO:0016787;GO:0016829;GO:0033987;GO:0052689;GO:0080030;	-	-	11425594	2-hydroxyisoflavanone dehydratase
Medtr7g405770	37.1693	17.6907	56.6479	3.20214	1.67904	0.00135851	0.12582	7	248231	249512	-	1097	Medtr7g405770	-	-	-	25499788	Lipid transfer protein
Medtr5g034930	4.9406	0	9.88119	Inf	Inf	0.00137439	0.12637	5	15189184	15192879	+	1356	Medtr5g034930	GO:0016020;GO:0016020;GO:0016020;GO:0016021;GO:0016021;GO:0016021;GO:0022857;GO:0022857;GO:0055085;	-	-	11415704	auxin-induced 5NG4-like protein
Medtr1g077890	140.315	74.7628	205.868	2.75361	1.46133	0.0013902	0.126903	1	34809215	34813563	+	1870	Medtr1g077890	GO:0003824;GO:0003824;GO:0016829;GO:0016829;GO:0018826;GO:0030170;GO:0030170;	K01761	[EC:4.4.1.11]	25484569	cystathionine beta-lyase/cystathionine gamma-synthase
Medtr1g071450	21.0089	7.01026	35.0076	4.99377	2.32013	0.00144987	0.129554	1	31705960	31709365	-	1643	Medtr1g071450	GO:0009734;GO:0010087;GO:0010305;	-	-	11425610	auxin canalization protein
Medtr5g026620	132.061	80.7465	183.376	2.27101	1.18334	0.00145935	0.129778	5	10970470	10973893	-	2130	Medtr5g026620	GO:0009916;GO:0009916;GO:0009916;GO:0016020;GO:0016021;GO:0016021;GO:0016491;GO:0046872;GO:0046872;GO:0055114;GO:0055114;GO:0055114;GO:0070469;GO:0070469;GO:0102721;GO:0102721;GO:0009916;GO:0009916;GO:0009916;GO:0016020;GO:0016021;GO:0016021;GO:0016491;GO:0046872;GO:0046872;GO:0055114;GO:0055114;GO:0055114;GO:0070469;GO:0070469;GO:0102721;GO:0102721;	K17893	[EC:1.10.3.11]	11415591	ubiquinol oxidase 1a
Medtr7g117540	83.4478	42.3024	124.593	2.9453	1.55841	0.00147638	0.13009	7	48694259	48696277	+	2019	Medtr7g117540	GO:0016020;GO:0016021;GO:0016021;	-	-	25499753	anaphase-promoting complex subunit 11 RING-H2 finger protein
Medtr4g015460	117.169	76.9702	157.368	2.04454	1.03178	0.0015	0.130469	4	4622289	4630459	-	2452	Medtr4g015460	GO:0004553;GO:0004553;GO:0005975;GO:0005975;GO:0008152;GO:0008422;GO:0016787;GO:0016798;GO:0102483;	K01188	[EC:3.2.1.21]	11422744	glycoside hydrolase family 1 protein
Medtr5g007230	55.0559	31.9825	78.1293	2.44287	1.28858	0.00156842	0.133345	5	1251572	1253324	+	642	Medtr5g007230	-	-	-	11435523	PLATZ transcription factor family protein
Medtr4g087100	19.4552	7.89251	31.0178	3.93003	1.97454	0.00158432	0.133573	4	34125168	34127490	-	1445	Medtr4g087100	GO:0016491;GO:0016491;GO:0016491;GO:0045486;GO:0046872;GO:0046872;GO:0051213;GO:0055114;GO:0055114;GO:0055114;	-	-	11445737	senescence-associated nodulin
Medtr3g099620	209.986	81.2468	338.725	4.16908	2.05973	0.00161813	0.135126	3	45670902	45673320	-	1428	Medtr3g099620	GO:0003677;GO:0003677;GO:0046983;GO:0046983;	-	-	11431242	basic helix loop helix (BHLH) DNA-binding family protein
Medtr7g085120	45.7661	26.0364	65.4959	2.51556	1.33088	0.00165739	0.137165	7	32910182	32913617	+	1630	Medtr7g085120	GO:0016787;GO:0016787;GO:0016787;GO:0017111;GO:0030246;GO:0030246;	K14641	[EC:3.6.1.5]	11441027	Nod factor-binding lectin-nucleotide phosphohydrolase
Medtr7g071120	155.407	85.8721	224.942	2.6195	1.38929	0.00167715	0.137165	7	26331107	26333946	-	1488	Medtr7g071120	GO:0003677;GO:0003700;GO:0003700;GO:0005634;GO:0005634;GO:0006355;GO:0006355;GO:0043565;GO:0043565;	K13424	-	11409601	WRKY transcription factor
Medtr1g070205	36.0486	19.0498	53.0473	2.78466	1.4775	0.00167754	0.137165	1	30903876	30905248	+	1201	Medtr1g070205	-	K13945	-	25484301	lateral organ boundaries (LOB) domain protein
Medtr8g024630	54.5871	31.8076	77.3666	2.43233	1.28234	0.00169812	0.138119	8	9103323	9104309	+	987	Medtr8g024630	GO:0016020;GO:0016021;GO:0016021;	-	-	25500634	transmembrane protein, putative
Medtr5g036410	122.758	71.0813	174.434	2.45401	1.29514	0.00181361	0.144276	5	15863815	15865380	-	1566	Medtr5g036410	GO:0004222;GO:0004222;GO:0006508;GO:0006508;GO:0006508;GO:0008233;GO:0008237;GO:0008237;GO:0008237;GO:0008270;GO:0008270;GO:0016020;GO:0016021;GO:0016021;GO:0016787;GO:0031012;GO:0031012;GO:0046872;	-	-	11406532	matrix metalloproteinase
Medtr8g073490	11.2155	2.99981	19.4311	6.47746	2.69543	0.00191334	0.150324	8	30992109	30997897	-	2811	Medtr8g073490	GO:0004970;GO:0004970;GO:0006811;GO:0016020;GO:0016020;GO:0016020;GO:0016021;GO:0016021;GO:0035235;	K05387	-	11423721	glutamate receptor 3.2
Medtr5g083810	78.2342	18.8441	137.624	7.30332	2.86855	0.0019443	0.150889	5	36156695	36159060	-	715	Medtr5g083810	-	-	-	11434084	transcription factor bHLH93-like protein
Medtr4g088190	1713.46	1071.21	2355.71	2.19912	1.13693	0.00202008	0.156292	4	34775358	34777697	+	2018	Medtr4g088190	GO:0008168;GO:0008168;GO:0008168;GO:0008171;GO:0008171;GO:0016740;GO:0030746;GO:0030746;GO:0032259;GO:0046983;GO:0046983;GO:0102670;GO:0102670;	K13259	-	25493070	Isoflavone-7-O-methyltransferase [Source:UniProtKB/TrEMBL;Acc:A0A072UNK8]
Medtr2g019250	124.057	75.6186	172.495	2.28111	1.18974	0.00204738	0.157922	2	6235284	6236207	-	666	Medtr2g019250	GO:0005576;GO:0005576;GO:0030145;GO:0030145;GO:0045735;GO:0045735;GO:0046872;	-	-	11439325	germin family protein
Medtr8g076620	12.2296	3.86091	20.5984	5.33511	2.41552	0.00215186	0.162523	8	32482156	32484876	+	2013	Medtr8g076620	-	-	-	25501609	zinc finger, LRP1 type protein
Medtr3g092060	128.768	82.701	174.835	2.11406	1.08002	0.00230513	0.168664	3	42017669	42019572	-	1904	Medtr3g092060	GO:0005524;GO:0005524;GO:0016020;GO:0016021;GO:0016021;GO:0016787;GO:0016787;	K08900	-	11430808	P-loop nucleoside triphosphate hydrolase superfamily protein
Medtr3g019160	127.082	81.8816	172.282	2.10403	1.07316	0.00230628	0.168664	3	5351072	5352297	+	911	Medtr3g019160	GO:0016491;GO:0016491;GO:0016491;GO:0055114;	K19784	-	11417697	NADPH:quinone oxidoreductase-like protein
Medtr7g079970	108.163	63.4364	152.89	2.41012	1.26911	0.00242699	0.173506	7	30381576	30383777	+	1186	Medtr7g079970	GO:0004725;GO:0004725;GO:0016311;GO:0016311;GO:0016787;GO:0016791;GO:0016791;GO:0035335;	K18045	[EC:3.1.3.48]	11406089	tyrosine phosphatase family protein
Medtr1g082390	29.1254	8.55904	49.6917	5.80575	2.53748	0.0024457	0.174339	1	36633371	36635459	+	1389	Medtr1g082390	GO:0004560;GO:0008152;GO:0016787;GO:0016788;GO:0016788;GO:0016798;	-	-	11405610	GDSL-like lipase/acylhydrolase
Medtr7g016060	12.812	0.899943	24.724	27.4729	4.77994	0.0025313	0.176961	7	5088671	5089778	-	650	Medtr7g016060	GO:0016020;GO:0016021;GO:0016021;	-	-	25497604	NADH-ubiquinone reductase complex 1 MLRQ subunit
Medtr4g064887	31.6578	15.351	47.9646	3.12452	1.64364	0.00257788	0.178253	4	24239094	24242368	+	2057	Medtr4g064887	GO:0016491;GO:0016491;GO:0055114;GO:0016491;GO:0016491;GO:0055114;	K08081	[EC:1.1.1.206]	25492543	NAD(P)-binding rossmann-fold protein
Medtr1g115370	19.184	8.18446	30.1836	3.68792	1.88281	0.00257789	0.178253	1	52068406	52069779	-	1178	Medtr1g115370	-	-	-	25485709	DUF966 domain protein
Medtr4g132430	306.824	182.582	431.067	2.36095	1.23937	0.00265738	0.181281	4	55364605	55367021	-	2115	Medtr4g132430	GO:0003677;GO:0003700;GO:0003700;GO:0005634;GO:0005634;GO:0006355;GO:0006355;GO:0043565;GO:0043565;GO:0003677;GO:0003700;GO:0003700;GO:0005634;GO:0005634;GO:0006355;GO:0006355;GO:0043565;GO:0043565;	-	-	11439068	WRKY1b transcription factor
Medtr3g098980	252.483	167.591	337.376	2.01308	1.00941	0.00286973	0.192243	3	45350049	45353662	-	1824	Medtr3g098980	GO:0016740;GO:0016746;GO:0016747;GO:0016747;GO:0102406;	K15400	[EC:2.3.1.188]	11435066	omega-hydroxypalmitate O-feruloyl transferase
Medtr8g013900	66.529	38.3027	94.7554	2.47386	1.30676	0.00289677	0.193429	8	4291273	4294762	-	947	Medtr8g013900	GO:0005886;GO:0005886;GO:0016020;GO:0016021;GO:0016021;	-	-	11418898	CASP-like protein
Medtr3g085890	135.326	80.9144	189.738	2.34493	1.22954	0.00293089	0.194101	3	38860868	38862867	+	1293	Medtr3g085890	GO:0016020;GO:0016021;GO:0016021;	-	-	11440407	NADH-ubiquinone reductase complex 1 MLRQ subunit
Medtr5g007713	1283.63	847.873	1719.38	2.02787	1.01997	0.00297157	0.194857	5	1477512	1479029	+	1392	Medtr5g007713	GO:0003824;GO:0003824;GO:0009058;GO:0009058;GO:0016740;GO:0016746;GO:0016746;GO:0016746;GO:0016747;GO:0016747;	K00660	[EC:2.3.1.74]	25494497	chalcone and stilbene synthase family protein
Medtr1g048160	14.2644	0	28.5288	Inf	Inf	0.00308645	0.19865	1	18227807	18232641	+	1746	Medtr1g048160	GO:0005544;GO:0005544;GO:0060548;GO:0060548;	-	-	25483162	calcium-dependent phospholipid-binding copine family protein
Medtr4g114000	54.699	30.7009	78.697	2.56334	1.35803	0.00309204	0.19865	4	46909437	46911085	-	1649	Medtr4g114000	GO:0006520;GO:0006520;GO:0006807;GO:0006807;GO:0016853;GO:0016855;GO:0016855;GO:0036361;GO:0036361;GO:0047689;	-	-	11440655	aspartate racemase
Medtr4g061650	35.172	14.7607	55.5834	3.76563	1.91289	0.00313072	0.200627	4	22807103	22807591	-	372	Medtr4g061650	-	-	-	11406485	hypothetical protein
Medtr4g116300	29.257	15.4542	43.0597	2.78627	1.47834	0.00339632	0.211246	4	48132366	48133843	-	753	Medtr4g116300	-	-	-	11439266	PLATZ transcription factor family protein
Medtr7g023630	26.7107	13.1421	40.2794	3.06492	1.61585	0.00342178	0.211858	7	7713226	7714204	-	979	Medtr7g023630	GO:0005515;	-	-	11438852	polygalacturonase inhibitor protein
Medtr2g098250	26.8558	13.6552	40.0564	2.93341	1.55258	0.00351487	0.213901	2	41997376	41999106	-	1731	Medtr2g098250	GO:0004407;GO:0005515;GO:0005618;GO:0009506;GO:0009507;GO:0016020;GO:0016301;GO:0016301;GO:0016310;GO:0016575;GO:0016787;GO:0032041;GO:0048046;GO:0070932;	-	-	11431420	LRR receptor-like kinase family protein
Medtr4g114060	26.3724	13.3688	39.376	2.94537	1.55845	0.00359448	0.215873	4	46937870	46940344	-	1081	Medtr4g114060	GO:0007017;GO:0007017;GO:0016787;GO:0030286;GO:0030286;	K10418	-	11439715	dynein light chain type 1 family protein
Medtr8g078490	28.0409	14.5455	41.5363	2.8556	1.5138	0.00362549	0.215873	8	33514038	33522768	-	3936	Medtr8g078490	GO:0003676;GO:0003676;GO:0005515;GO:0005634;GO:0005634;GO:0005634;GO:0005694;GO:0005694;GO:0008168;GO:0008270;GO:0008270;GO:0016740;GO:0018024;GO:0018024;GO:0018024;GO:0032259;GO:0034968;GO:0034968;	-	-	11409723	histone-lysine N-methyltransferase SUVR5-like protein
Medtr3g083920	885.419	518.39	1252.45	2.41604	1.27264	0.0036362	0.215873	3	37862361	37864013	-	1554	Medtr3g083920	GO:0003824;GO:0003824;GO:0009058;GO:0009058;GO:0016210;GO:0016740;GO:0016746;GO:0016746;GO:0016746;GO:0016747;GO:0016747;	K00660	[EC:2.3.1.74]	11438511	chalcone and stilbene synthase family protein
Medtr1g027580	4.67518	0.299981	9.05037	30.1698	4.91503	0.00364992	0.215873	1	9161150	9164653	-	2267	Medtr1g027580	GO:0004672;GO:0004672;GO:0005509;GO:0005509;GO:0005524;GO:0005524;GO:0006468;GO:0006468;GO:0016020;GO:0016021;GO:0016021;GO:0016301;GO:0016310;GO:0030247;GO:0030247;	-	-	25482299	wall-associated receptor kinase-like protein
Medtr5g076170	126.555	77.1115	175.999	2.2824	1.19055	0.00365786	0.215873	5	32436731	32437833	+	1103	Medtr5g076170	GO:0016020;GO:0016021;GO:0016021;	-	-	11426665	late embryogenesis abundant hydroxyproline-rich glycoprotein, putative
Medtr1g033810	76.0724	41.797	110.348	2.64009	1.40059	0.0036995	0.216818	1	12217922	12222045	+	1527	Medtr1g033810	GO:0008168;GO:0016491;GO:0016491;GO:0016491;GO:0032259;GO:0046872;GO:0046872;GO:0055114;GO:0055114;GO:0055114;GO:0102802;GO:0102804;	-	-	25482640	2OG-Fe(II) oxygenase family oxidoreductase
Medtr5g055480	70.5629	40.7451	100.381	2.46363	1.30078	0.00386279	0.224316	5	22840980	22843585	-	1794	Medtr5g055480	GO:0008375;GO:0008375;GO:0016020;GO:0016020;GO:0016020;GO:0016021;GO:0016021;GO:0016740;	-	-	11415785	core-2/I-branching enzyme
Medtr7g405730	29.1191	5.4396	52.7985	9.70633	3.27893	0.00396607	0.228225	7	238597	240382	+	1133	Medtr7g405730	GO:0005886;GO:0005886;GO:0005887;GO:0008643;GO:0008643;GO:0016020;GO:0016021;GO:0016021;GO:0016021;GO:0034219;GO:0051119;	K15382	-	25499785	bidirectional sugar transporter
Medtr3g111380	49.6349	30.3435	68.9263	2.27153	1.18367	0.00397624	0.228292	3	52046530	52050786	-	3078	Medtr3g111380	GO:0003824;GO:0003824;GO:0005975;GO:0005975;GO:0016829;GO:0016829;GO:0030246;GO:0030246;GO:0016829;GO:0016829;GO:0030246;GO:0030246;GO:0016829;GO:0016829;GO:0030246;GO:0030246;GO:0016829;GO:0016829;GO:0030246;GO:0030246;GO:0016829;GO:0016829;GO:0030246;GO:0030246;GO:0016829;GO:0016829;GO:0030246;GO:0030246;	K18195	[EC:4.2.2.23]	11422528	rhamnogalacturonate lyase B-like protein
Medtr4g057635	85.4282	53.9072	116.949	2.16946	1.11733	0.00401902	0.229596	4	21173419	21175385	+	1188	Medtr4g057635	GO:0003677;GO:0003677;GO:0003677;GO:0005634;	K09422	-	25492386	myb transcription factor
Medtr6g022020	23.9036	11.7425	36.0648	3.07131	1.61885	0.00402609	0.229596	6	7630103	7631466	-	947	Medtr6g022020	GO:0005515;	-	-	11416009	BCL-2 binding anthanogene-1 protein
Medtr7g090590	507.995	220.286	795.704	3.61215	1.85286	0.0040567	0.230823	7	35649513	35650637	-	394	Medtr7g090590	GO:0009740;	-	-	11422708	GASA/GAST/Snakin
Medtr7g117505	12.6708	4.50975	20.8319	4.61929	2.20767	0.00407072	0.231102	7	48667270	48669538	-	1857	Medtr7g117505	GO:0004806;GO:0006629;GO:0006629;GO:0016020;GO:0016021;GO:0016021;GO:0016787;GO:0016787;	-	-	25499748	triacylglycerol lipase-like protein
Medtr2g012770	47.0064	27.9161	66.0967	2.36769	1.24348	0.00430359	0.240838	2	3279450	3282736	+	2832	Medtr2g012770	GO:0005515;GO:0007165;GO:0007165;GO:0043531;GO:0043531;	-	-	11434353	disease resistance protein (TIR-NBS-LRR class)
Medtr3g080810	138.335	46.776	229.895	4.9148	2.29713	0.0044402	0.244762	3	36572815	36575499	-	1847	Medtr3g080810	GO:0000272;GO:0003824;GO:0003824;GO:0004553;GO:0004553;GO:0004553;GO:0005975;GO:0005975;GO:0005975;GO:0008152;GO:0008810;GO:0008810;GO:0008810;GO:0016787;GO:0016798;GO:0030245;GO:0030245;	-	-	11438939	glycosyl hydrolase family 9 protein
Medtr3g083570	67.7983	43.6366	91.96	2.10741	1.07547	0.00477076	0.259802	3	37718516	37720729	-	1588	Medtr3g083570	-	-	-	11439467	calmodulin-binding family protein
Medtr6g086340	131.157	58.6165	203.697	3.47509	1.79705	0.00487627	0.264697	6	32430826	32435886	+	1592	Medtr6g086340	GO:0016491;GO:0016491;GO:0016491;GO:0016620;GO:0016620;GO:0055114;GO:0055114;GO:0055114;	K12355	[EC:1.2.1.68]	11439969	cytosolic aldehyde dehydrogenase
Medtr3g045790	28.3818	14.8847	41.8788	2.81355	1.49239	0.00492821	0.266615	3	15020791	15021750	-	960	Medtr3g045790	-	-	-	25488905	DUF4228 domain protein
Medtr1g029540	35.7722	20.0509	51.4934	2.56813	1.36072	0.00497642	0.267365	1	10161428	10162813	+	1386	Medtr1g029540	GO:0016740;GO:0016757;GO:0016758;GO:0016758;	K13495	[EC:2.4.1.215]	25482435	zeatin O-glucosyltransferase-like protein
Medtr3g028720	234.454	122.323	346.585	2.83335	1.50251	0.00498359	0.267365	3	9212118	9215755	+	2165	Medtr3g028720	GO:0004553;GO:0004553;GO:0005975;GO:0005975;GO:0008152;GO:0008422;GO:0016787;GO:0016798;GO:0102483;GO:0004553;GO:0004553;GO:0005975;GO:0005975;GO:0008152;GO:0016787;GO:0016798;GO:0004553;GO:0004553;GO:0005975;GO:0005975;GO:0016787;GO:0004553;GO:0004553;GO:0005975;GO:0005975;GO:0016787;	K01188	[EC:3.2.1.21]	25488770	glycoside hydrolase family 1 protein
Medtr3g086450	5.93107	0.929851	10.9323	11.757	3.55545	0.00501392	0.267365	3	39164643	39170640	-	1827	Medtr3g086450	GO:0004553;GO:0004553;GO:0005975;GO:0005975;GO:0008152;GO:0016787;GO:0016798;	-	-	11408931	cellulase (glycosyl hydrolase family 5)
Medtr5g055680	90.9577	59.4859	122.429	2.05813	1.04133	0.005015	0.267365	5	22926190	22929723	+	2594	Medtr5g055680	GO:0008168;GO:0016491;GO:0016491;GO:0016491;GO:0032259;GO:0046872;GO:0046872;GO:0055114;GO:0055114;GO:0055114;GO:0102803;GO:0102805;	-	-	11408226	flavonol synthase/flavanone 3-hydroxylase
Medtr2g009670	23.0162	11.4493	34.5832	3.02056	1.59482	0.00506521	0.269475	2	2014513	2017652	-	2277	Medtr2g009670	GO:0004672;GO:0004672;GO:0004674;GO:0004674;GO:0005509;GO:0005509;GO:0005524;GO:0005524;GO:0006468;GO:0006468;GO:0016020;GO:0016021;GO:0016021;GO:0016021;GO:0016301;GO:0016310;GO:0016740;GO:0030247;GO:0030247;	-	-	11423592	wall associated kinase-like protein
Medtr2g093960	61.183	36.8292	85.5367	2.32252	1.21569	0.00510521	0.270904	2	40039886	40042385	+	1660	Medtr2g093960	GO:0003676;GO:0003676;GO:0003700;GO:0003700;GO:0006355;GO:0046872;GO:0046872;	-	-	11416076	C2H2-type zinc finger protein
Medtr5g014300	27.5314	14.6449	40.4178	2.75985	1.46459	0.00515938	0.271638	5	4775644	4779821	+	1850	Medtr5g014300	GO:0003677;GO:0003677;GO:0003677;GO:0005634;GO:0005634;GO:0006355;GO:0006355;	-	-	11430263	NAC transcription factor-like protein
Medtr6g004280	193.538	68.1721	318.904	4.67792	2.22587	0.00517428	0.271859	6	218503	220686	+	1433	Medtr6g004280	GO:0006541;GO:0006541;GO:0016740;GO:0016740;GO:0016787;GO:0016787;	-	-	25495100	class I glutamine amidotransferase
Medtr4g029200	21.9692	10.6403	33.2981	3.12943	1.6459	0.00522929	0.273443	4	10082646	10084664	-	1293	Medtr4g029200	GO:0004601;GO:0004601;GO:0004601;GO:0005576;GO:0005576;GO:0006979;GO:0006979;GO:0006979;GO:0016491;GO:0020037;GO:0020037;GO:0020037;GO:0042744;GO:0042744;GO:0042744;GO:0046872;GO:0046872;GO:0055114;GO:0055114;GO:0055114;GO:0098869;	K00430	[EC:1.11.1.7]	25491725	class III peroxidase
Medtr7g068550	35.3507	20.2674	50.434	2.48843	1.31523	0.00547184	0.281661	7	25108352	25111201	-	1178	Medtr7g068550	GO:0016787;GO:0016787;	-	-	25498751	GDSL-like lipase/acylhydrolase
Medtr3g073670	101.825	66.7915	136.859	2.04905	1.03495	0.00554033	0.284034	3	33234846	33236304	+	999	Medtr3g073670	GO:0030001;GO:0030001;GO:0046872;GO:0046872;GO:0046872;	-	-	25489401	heavy metal transport/detoxification superfamily protein
Medtr4g120970	10.4376	1.91277	18.9624	9.91361	3.30941	0.00573234	0.291478	6	10796892	10797938	-	969	Medtr4g120970	GO:0006952;GO:0006952;GO:0006952;GO:0009607;GO:0009607;	-	-	25495933	pathogenesis-related protein bet V I family protein
Medtr4g010250	6.22757	0.965227	11.4899	11.9038	3.57336	0.0059069	0.295849	4	2305617	2308253	-	762	Medtr4g010250	GO:0005515;	-	-	11418700	TPR repeat protein
Medtr6g088785	70.4554	41.0801	99.8306	2.43015	1.28104	0.00591068	0.295849	6	33907265	33912187	+	3705	Medtr6g088785	GO:0000166;GO:0004672;GO:0004672;GO:0004674;GO:0004674;GO:0005515;GO:0005524;GO:0005524;GO:0005524;GO:0006468;GO:0006468;GO:0016020;GO:0016021;GO:0016021;GO:0016301;GO:0016310;GO:0016740;GO:0000166;GO:0004672;GO:0004672;GO:0004674;GO:0004674;GO:0005515;GO:0005524;GO:0005524;GO:0005524;GO:0006468;GO:0006468;GO:0016020;GO:0016021;GO:0016021;GO:0016301;GO:0016310;GO:0016740;	-	-	25496980	leucine-rich receptor-like kinase family protein
Medtr8g022790	86.7723	42.7539	130.791	3.05915	1.61313	0.00610001	0.300582	8	8091969	8094128	-	1183	Medtr8g022790	GO:0016787;GO:0016788;GO:0016788;	-	-	11445921	GDSL-like lipase/acylhydrolase
Medtr8g088250	38.7129	23.0198	54.4061	2.36345	1.2409	0.00620675	0.30379	8	36539541	36541903	-	873	Medtr8g088250	GO:0003950;GO:0003950;	-	-	11426589	inactive poly [ADP-ribose] polymerase SRO2, putative
Medtr3g112120	30.6877	17.3847	43.9908	2.53043	1.33938	0.00629825	0.305512	3	52474500	52477877	-	1721	Medtr3g112120	GO:0004497;GO:0004497;GO:0005506;GO:0005506;GO:0016491;GO:0016705;GO:0016705;GO:0020037;GO:0020037;GO:0046872;GO:0055114;GO:0055114;GO:0055114;	-	-	25490211	cytochrome P450 family protein
Medtr3g077910	27.6098	11.4155	43.8041	3.83725	1.94007	0.00646733	0.307344	3	35094983	35098351	+	1167	Medtr3g077910	GO:0004089;GO:0004089;GO:0004089;GO:0008270;GO:0008270;GO:0008270;GO:0015976;GO:0015976;GO:0016829;	K01673	[EC:4.2.1.1]	11429026	carbonic anhydrase family protein
Medtr6g452730	47.4463	11.2895	83.6031	7.40539	2.88858	0.00657172	0.31056	6	18489882	18492916	-	921	Medtr6g452730	-	-	-	25497091	PAR1 protein
Medtr1g112630	23.2745	11.7556	34.7934	2.95973	1.56547	0.00659702	0.310785	1	50980236	50981837	-	1602	Medtr1g112630	GO:0003993;GO:0003993;GO:0003993;GO:0016311;GO:0016787;GO:0016787;GO:0016787;GO:0046872;GO:0046872;	K22390	-	25485616	purple acid phosphatase superfamily protein
Medtr5g007730	584.828	368.51	801.146	2.17401	1.12036	0.00661324	0.310785	5	1491469	1493177	+	1415	Medtr5g007730	GO:0003824;GO:0003824;GO:0009058;GO:0009058;GO:0016210;GO:0016740;GO:0016746;GO:0016746;GO:0016746;GO:0016747;GO:0016747;	K00660	[EC:2.3.1.74]	11436702	chalcone and stilbene synthase family protein
Medtr0246s0020	43.4348	26.5896	60.28	2.26705	1.18082	0.0066327	0.311067	scaffold0246	3127	5996	-	1867	Medtr0246s0020	GO:0003677;GO:0003677;GO:0046983;GO:0046983;GO:0003677;GO:0003677;GO:0046983;GO:0046983;	-	-	25480724	basic helix loop helix (bHLH) DNA-binding family protein
Medtr3g081500	84.6859	54.7605	114.611	2.09296	1.06554	0.00664375	0.311067	3	36904409	36905059	+	651	Medtr3g081500	-	-	-	25489645	VQ motif protein
Medtr2g078370	10.4506	3.52684	17.3743	4.92631	2.30051	0.00693388	0.319743	2	32641484	32642266	-	783	Medtr2g078370	-	-	-	25487275	BZIP transcription factor, putative
Medtr4g101310	231.476	133.97	328.982	2.45564	1.2961	0.0069686	0.319743	4	41841657	41842329	+	673	Medtr4g101310	GO:0006508;GO:0008233;GO:0008233;	-	-	11407919	protease inhibitor/seed storage/LTP family protein
Medtr5g026640	177.589	103.85	251.328	2.4201	1.27507	0.00700904	0.320483	5	10980286	10985324	+	2386	Medtr5g026640	GO:0015204;GO:0015204;GO:0015293;GO:0016020;GO:0016020;GO:0016020;GO:0016021;GO:0016021;GO:0016021;GO:0022857;GO:0022857;GO:0055085;GO:0055085;GO:0071918;GO:0071918;	K20989	-	11407898	sodium:solute symporter family protein
Medtr3g083760	25.4561	12.9003	38.0118	2.94659	1.55905	0.00712905	0.32306	3	37787523	37789571	-	1316	Medtr3g083760	GO:0016020;GO:0016021;GO:0016021;	-	-	11435671	Lipid transfer protein
Medtr3g065080	111.014	67.0121	155.017	2.31326	1.20993	0.00724179	0.325325	3	29353215	29355431	+	2217	Medtr3g065080	GO:0004842;GO:0004842;GO:0016567;GO:0016567;GO:0016567;GO:0016740;GO:0016746;GO:0016874;	-	-	11406642	Avr9/Cf-9 rapidly elicited protein
Medtr1g043350	17.1672	5.85336	28.481	4.86576	2.28266	0.00743787	0.329313	1	16251768	16252550	-	783	Medtr1g043350	GO:0003677;GO:0003677;GO:0003677;GO:0003700;GO:0003700;GO:0005634;GO:0005634;GO:0006351;GO:0006355;GO:0006355;GO:0009867;	K14516	-	11424277	ethylene-responsive transcription factor 1B
Medtr8g006780	29.0709	16.2686	41.8731	2.57386	1.36393	0.00749876	0.329313	8	947647	952937	-	2151	Medtr8g006780	GO:0016020;GO:0016021;GO:0016021;GO:0016021;GO:0055085;GO:0055085;GO:0016020;GO:0016021;GO:0016021;GO:0016021;GO:0055085;GO:0055085;	-	-	25500038	auxin efflux carrier family protein
Medtr1g026110	68.3972	42.7994	93.995	2.19618	1.13499	0.00752612	0.329313	1	8431354	8432503	+	1150	Medtr1g026110	-	-	-	11420427	syringolide-induced protein 14-1-1
Medtr1g073180	69.8555	46.4808	93.2302	2.00578	1.00416	0.00763972	0.331407	1	32460021	32467731	+	2549	Medtr1g073180	GO:0003824;GO:0003824;GO:0016874;GO:0016874;GO:0003824;GO:0003824;GO:0016874;GO:0016874;	-	-	11431202	4-coumarate:CoA ligase-like protein
Medtr7g100335	18.5323	8.75579	28.3088	3.23315	1.69294	0.00773363	0.334414	7	40266201	40267763	+	1377	Medtr7g100335	GO:0004180;GO:0006508;GO:0016787;	-	-	25499304	Plant protein 1589 of unknown function [Source:Projected from Arabidopsis thaliana (AT5G02580) TAIR;Acc:AT5G02580]
Medtr6g087200	4.97246	0	9.94491	Inf	Inf	0.00785354	0.336654	6	33269872	33275133	-	4123	Medtr6g087200	GO:0005515;GO:0007165;GO:0007165;GO:0043531;GO:0043531;GO:0005515;GO:0007165;GO:0007165;GO:0043531;GO:0043531;	-	-	11437473	disease resistance protein (TIR-NBS-LRR class), putative
Medtr4g111935	14.3551	6.14022	22.5699	3.67575	1.87804	0.00804761	0.338563	4	46279251	46280786	-	1440	Medtr4g111935	GO:0003677;GO:0005634;GO:0006351;GO:0006355;	-	-	25493935	TCP family transcription factor
Medtr1g097910	34.8643	19.4273	50.3012	2.5892	1.37251	0.00813854	0.340436	1	44132269	44133790	+	1400	Medtr1g097910	GO:0003824;GO:0003824;GO:0009058;GO:0009058;GO:0016740;GO:0016746;GO:0016746;GO:0016746;GO:0016747;GO:0016747;	K00660	[EC:2.3.1.74]	11420334	chalcone and stilbene synthase family protein
Medtr5g464770	70.4287	39.0453	101.812	2.60753	1.38269	0.00816697	0.340454	5	26913445	26915643	-	820	Medtr5g464770	GO:0008168;GO:0008168;GO:0008168;GO:0016740;GO:0032259;	K14568	[EC:2.1.1.260]	25495057	EMG1/NEP1 methyltransferase
Medtr5g007717	305.988	184.734	427.243	2.31275	1.20961	0.00828643	0.343042	5	1481579	1483333	+	1546	Medtr5g007717	GO:0003824;GO:0003824;GO:0009058;GO:0009058;GO:0016210;GO:0016740;GO:0016746;GO:0016746;GO:0016746;GO:0016747;GO:0016747;	K00660	[EC:2.3.1.74]	25494498	chalcone and stilbene synthase family protein
Medtr5g066990	35.5581	20.8779	50.2383	2.40628	1.26681	0.00851179	0.347999	5	28283887	28295251	+	556	Medtr5g066990	GO:0003700;GO:0003700;GO:0005634;GO:0005634;GO:0006355;GO:0006355;GO:0003700;GO:0003700;GO:0005634;GO:0005634;GO:0006355;GO:0006355;	-	-	11423803	MADS-box transcription factor
Medtr2g021690	367.476	229.376	505.575	2.20413	1.14021	0.00879663	0.356032	2	7380379	7382066	+	1688	Medtr2g021690	GO:0016020;GO:0016021;GO:0016021;	-	-	11441884	T1.3 protein
Medtr7g081130	21.2635	10.3011	32.2259	3.1284	1.64542	0.00885126	0.357104	7	30933268	30934930	-	819	Medtr7g081130	GO:0000079;GO:0000079;GO:0000079;GO:0019901;GO:0019901;GO:0019901;	-	-	11428922	cyclin p4
Medtr4g018940	19.6592	9.59174	29.7266	3.09919	1.63189	0.00887436	0.357443	4	5856180	5859299	-	3120	Medtr4g018940	GO:0005515;GO:0016020;GO:0016021;GO:0016021;	-	-	11419248	disease resistance family protein/LRR protein
Medtr2g055430	68.9852	36.1609	101.809	2.81546	1.49337	0.00906139	0.360425	2	23765693	23769179	+	2236	Medtr2g055430	GO:0004497;GO:0004497;GO:0005506;GO:0005506;GO:0016020;GO:0016021;GO:0016021;GO:0016491;GO:0016705;GO:0016705;GO:0020037;GO:0020037;GO:0046872;GO:0055114;GO:0055114;GO:0055114;GO:0005506;GO:0005506;GO:0016020;GO:0016021;GO:0016021;GO:0016705;GO:0016705;GO:0020037;GO:0020037;GO:0055114;GO:0055114;	-	-	25486774	cytochrome P450 family 72 protein
Medtr8g099475	19.247	7.89669	30.5974	3.87471	1.95409	0.00915354	0.362386	8	41983607	41984114	+	508	Medtr8g099475	-	-	-	25502186	hypothetical protein
Medtr6g033280	38.6083	19.1163	58.1003	3.0393	1.60374	0.00925288	0.363886	6	10599019	10602101	+	1493	Medtr6g033280	GO:0016020;GO:0016021;GO:0016021;GO:0022857;GO:0022857;GO:0055085;	K15102	-	25495904	phosphate carrier protein
Medtr7g016780	10.0817	3.44805	16.7155	4.8478	2.27733	0.00945757	0.367014	7	5301948	5303502	+	1394	Medtr7g016780	GO:0003824;GO:0003824;GO:0009058;GO:0009058;GO:0016210;GO:0016740;GO:0016746;GO:0016746;GO:0016746;GO:0016747;GO:0016747;	K00660	[EC:2.3.1.74]	11421144	chalcone and stilbene synthase family protein
Medtr3g083810	18.6542	9.1931	28.1152	3.0583	1.61273	0.00947766	0.367014	3	37807919	37812501	-	2211	Medtr3g083810	GO:0003993;GO:0003993;GO:0003993;GO:0016311;GO:0016787;GO:0016787;GO:0016787;GO:0046872;GO:0046872;	K22390	-	11433230	purple acid phosphatase superfamily protein
Medtr8g102550	16.4075	7.63884	25.1761	3.2958	1.72063	0.00948737	0.367014	8	43176042	43184129	-	1582	Medtr8g102550	GO:0003824;GO:0003824;GO:0004721;GO:0004722;GO:0004722;GO:0006470;GO:0006470;GO:0016787;GO:0043169;GO:0043169;GO:0046872;GO:0046872;	K14497	[EC:3.1.3.16]	11408102	protein phosphatase 2C-like protein
Medtr4g126900	22.7741	11.8916	33.6566	2.83027	1.50094	0.00957603	0.369317	4	52622831	52624441	-	1109	Medtr4g126900	GO:0003677;GO:0003677;GO:0003677;GO:0003700;GO:0003700;GO:0005634;GO:0005634;GO:0006355;GO:0006355;GO:0043565;GO:0043565;	-	-	11443759	homeobox associated leucine zipper protein
Medtr2g035850	204.303	113.241	295.365	2.60829	1.3831	0.00967073	0.37184	2	15214004	15215247	+	1244	Medtr2g035850	-	-	-	11440562	VQ motif protein
Medtr2g090525	11.5776	4.39558	18.7596	4.26782	2.0935	0.00968705	0.371904	2	38636263	38639430	+	2972	Medtr2g090525	GO:0005783;GO:0005783;GO:0005886;GO:0005886;GO:0010155;GO:0010155;GO:0005783;GO:0005783;GO:0005886;GO:0005886;GO:0010155;GO:0010155;GO:0005783;GO:0005783;GO:0005886;GO:0005886;GO:0010155;GO:0010155;GO:0005783;GO:0005783;GO:0005886;GO:0005886;GO:0010155;GO:0010155;GO:0005783;GO:0005783;GO:0005886;GO:0005886;GO:0010155;GO:0010155;	-	-	25487679	proton pump interactor, putative
Medtr3g099700	72.3351	46.3529	98.3172	2.12106	1.08478	0.00992961	0.378923	3	45706380	45710625	-	1789	Medtr3g099700	GO:0006855;GO:0006855;GO:0015238;GO:0015238;GO:0015297;GO:0015297;GO:0016020;GO:0016020;GO:0016020;GO:0016021;GO:0016021;GO:0055085;GO:0055085;	K03327	-	11435153	MATE efflux family protein
Medtr4g084710	44.0991	26.6507	61.5476	2.30941	1.20753	0.0100055	0.379535	4	33015681	33017478	+	1798	Medtr4g084710	GO:0004180;GO:0004185;GO:0004185;GO:0004185;GO:0006508;GO:0006508;GO:0006508;GO:0008233;GO:0016787;	K09645	[EC:3.4.16.-]	25493004	serine carboxypeptidase-like protein
Medtr7g096530	24.3783	13.1649	35.5916	2.70353	1.43484	0.010173	0.383597	7	38731014	38732933	+	1367	Medtr7g096530	-	K13944	-	25499227	LOB domain protein
Medtr1g115870	20.371	10.4937	30.2483	2.88252	1.52733	0.0102255	0.384138	1	52333273	52334916	-	1394	Medtr1g115870	GO:0016853;GO:0016872;GO:0016872;	K01859	[EC:5.5.1.6]	11445536	chalcone-flavanone isomerase family protein
Medtr2g011280	8.347	2.46513	14.2289	5.77206	2.52909	0.0103119	0.385399	2	2723023	2726806	-	2526	Medtr2g011280	GO:0000166;GO:0004672;GO:0004672;GO:0004674;GO:0004674;GO:0004674;GO:0005524;GO:0005524;GO:0005524;GO:0006468;GO:0006468;GO:0016020;GO:0016021;GO:0016021;GO:0016301;GO:0016310;GO:0016740;GO:0030246;GO:0030246;GO:0048544;GO:0048544;	-	-	11430363	G-type lectin S-receptor-like Serine/Threonine-kinase
Medtr5g030770	756.867	503.134	1010.6	2.00861	1.0062	0.0103547	0.386427	5	13147840	13150103	-	1523	Medtr5g030770	GO:0046983;GO:0046983;GO:0046983;GO:0046983;	-	-	11409352	transcription factor bHLH93
Medtr8g011170	31.2561	18.3399	44.1723	2.40854	1.26816	0.0106259	0.389644	8	2908997	2912219	-	2865	Medtr8g011170	GO:0043531;GO:0043531;	-	-	11421992	NB-ARC domain disease resistance protein
Medtr1g069430	53.6185	28.7368	78.5002	2.7317	1.4498	0.0106263	0.389644	1	30034662	30038767	+	1529	Medtr1g069430	GO:0006069;GO:0006069;GO:0008270;GO:0008270;GO:0016491;GO:0016491;GO:0016491;GO:0016829;GO:0046872;GO:0051903;GO:0051903;GO:0051903;GO:0055114;GO:0055114;GO:0055114;	K00121	-	25484194	Zn-dependent alcohol dehydrogenase family, class III protein
Medtr4g027390	34.5369	20.9562	48.1177	2.29611	1.19919	0.0109904	0.399575	4	9462674	9466238	-	1000	Medtr4g027390	GO:0016036;GO:0016036;	-	-	25491688	phosphorus starvation-induced protein
Medtr8g066260	8.06022	0.329889	15.7905	47.8662	5.58094	0.0110356	0.400644	8	27522099	27527626	-	723	Medtr8g066260	GO:0000977;GO:0000977;GO:0003677;GO:0003677;GO:0003677;GO:0003700;GO:0003700;GO:0005634;GO:0005634;GO:0005634;GO:0006351;GO:0006355;GO:0006355;GO:0045944;GO:0045944;GO:0046983;GO:0046983;	K09264	-	11418521	MADS-box transcription factor
Medtr3g101900	99.8741	57.5232	142.225	2.47248	1.30596	0.0114088	0.410668	3	46950514	46952092	-	1579	Medtr3g101900	GO:0016740;GO:0016746;GO:0016747;GO:0016747;GO:0047172;	-	-	11432319	HXXXD-type acyl-transferase family protein
Medtr5g006780	599.515	370.428	828.602	2.23688	1.16149	0.0115245	0.412595	5	1064591	1066375	+	1354	Medtr5g006780	GO:0003824;GO:0003824;GO:0010181;GO:0010181;GO:0016491;GO:0016491;GO:0016491;GO:0016629;GO:0055114;GO:0055114;GO:0055114;	K05894	[EC:1.3.1.42]	11441456	12-oxophytodienoate reductase-like protein
Medtr5g020940	2.92614	0	5.85227	Inf	Inf	0.0116342	0.414663	5	8028597	8031522	+	1376	Medtr5g020940	GO:0008168;GO:0008168;GO:0008168;GO:0016740;GO:0032259;	K21483	[EC:2.1.1.274]	11416968	salicylic acid carboxyl methyltransferase
Medtr2g064940	37.1803	10.0564	64.3043	6.39438	2.6768	0.0117347	0.417659	2	29356076	29358392	+	1484	Medtr2g064940	GO:0000166;GO:0004672;GO:0004672;GO:0004674;GO:0004674;GO:0005524;GO:0005524;GO:0005524;GO:0006468;GO:0006468;GO:0016301;GO:0016310;GO:0016740;	-	-	11440760	receptor-like kinase
Medtr5g083860	1374.17	887.169	1861.18	2.09788	1.06893	0.0118577	0.420533	5	36189329	36191603	+	1274	Medtr5g083860	GO:0004601;GO:0004601;GO:0004601;GO:0005576;GO:0005576;GO:0006979;GO:0006979;GO:0006979;GO:0016491;GO:0020037;GO:0020037;GO:0020037;GO:0042744;GO:0042744;GO:0042744;GO:0046872;GO:0046872;GO:0055114;GO:0055114;GO:0055114;GO:0098869;	K00430	[EC:1.11.1.7]	11429686	class III peroxidase
Medtr2g055250	50.2085	32.8189	67.5981	2.05973	1.04246	0.0124135	0.430941	2	23687045	23688603	+	1559	Medtr2g055250	GO:0005515;	-	-	25486766	F-box protein
Medtr4g070370	11.3951	2.53588	20.2544	7.98711	2.99767	0.0126663	0.436341	4	26512790	26515162	+	1316	Medtr4g070370	-	K13266	[EC:1.23.1.-]	11413938	isoflavone reductase-like Bet protein, putative
Medtr4g018800	5.26535	0	10.5307	Inf	Inf	0.0128063	0.438576	4	5804032	5806388	-	1599	Medtr4g018800	GO:0004497;GO:0004497;GO:0005506;GO:0005506;GO:0016020;GO:0016021;GO:0016021;GO:0016491;GO:0016705;GO:0016705;GO:0020037;GO:0020037;GO:0046872;GO:0055114;GO:0055114;GO:0055114;	K23136	[EC:1.14.14.164]	11415304	cytochrome P450 family protein
Medtr2g035130	124.658	66.2168	183.098	2.76513	1.46735	0.01319	0.446298	2	13508378	13509836	+	800	Medtr2g035130	GO:0006952;GO:0006952;	-	-	11413927	disease-resistance response protein
Medtr4g098930	35.1509	11.2798	59.022	5.23252	2.38751	0.0133369	0.449471	4	40866852	40868963	+	1228	Medtr4g098930	GO:0005576;GO:0005576;	-	-	25493556	expansin-B1-like protein
Medtr8g088110	59.776	37.8425	81.7096	2.15921	1.1105	0.0134405	0.451676	8	36484737	36487392	+	1123	Medtr8g088110	GO:0016020;GO:0016021;GO:0016021;GO:0016021;	-	-	11408207	cold acclimation protein WCOR413
Medtr4g039680	13.0993	5.70967	20.4888	3.58844	1.84336	0.0137346	0.458006	4	14111599	14114367	+	1104	Medtr4g039680	-	-	-	11441906	DUF642 family protein
Medtr4g126020	133.678	84.8885	182.468	2.1495	1.104	0.014006	0.463637	4	52366719	52370164	-	2625	Medtr4g126020	-	-	-	25494220	calmodulin-binding family protein
Medtr6g027740	4.0166	0.329889	7.70331	23.3512	4.54543	0.0140701	0.464365	6	9693144	9693489	-	346	Medtr6g027740	-	-	-	25495836	hypothetical protein
Medtr3g072560	3.15657	0	6.31313	Inf	Inf	0.0142596	0.468738	3	32644212	32647174	-	1486	Medtr3g072560	GO:0016020;GO:0016020;GO:0016020;GO:0016021;GO:0016021;GO:0016021;GO:0022857;GO:0022857;GO:0055085;	-	-	11415876	nodulin MtN21/EamA-like transporter family protein
Medtr1g112850	7.98305	2.56708	13.399	5.21957	2.38393	0.0144091	0.471817	1	51151589	51155213	+	2664	Medtr1g112850	GO:0071249;GO:0071249;	-	-	25485633	DUF630 family protein
Medtr4g124520	24.5659	12.9492	36.1826	2.79421	1.48244	0.0144554	0.472116	4	51546651	51548632	+	1566	Medtr4g124520	GO:0004857;GO:0004857;GO:0005618;GO:0016787;GO:0030599;GO:0030599;GO:0030599;GO:0042545;GO:0042545;GO:0042545;GO:0043086;GO:0045330;GO:0045330;GO:0045330;GO:0045490;GO:0045490;GO:0045490;	K01051	[EC:3.1.1.11]	11441702	pectinesterase/pectinesterase inhibitor
Medtr3g110195	23.7431	13.2803	34.2059	2.57568	1.36495	0.0145853	0.475138	3	51196407	51201204	-	2135	Medtr3g110195	GO:0016491;GO:0016702;GO:0016702;GO:0045549;GO:0046872;GO:0046872;GO:0051213;GO:0055114;GO:0055114;GO:0055114;	-	-	25490129	retinal pigment epithelial membrane protein
Medtr4g117390	42.4761	27.4037	57.5486	2.10003	1.07041	0.0149869	0.48142	4	48691786	48693934	+	690	Medtr4g117390	GO:0016787;GO:0016787;	-	-	25494014	endo-1,3-1,4-beta-D-glucanase-like protein
Medtr5g007760	15.3657	3.46027	27.2712	7.88123	2.97842	0.0154424	0.492598	5	1504237	1506210	+	1635	Medtr5g007760	GO:0003824;GO:0003824;GO:0009058;GO:0009058;GO:0016210;GO:0016740;GO:0016746;GO:0016746;GO:0016746;GO:0016747;GO:0016747;	K00660	[EC:2.3.1.74]	11442534	chalcone and stilbene synthase family protein
Medtr5g064120	28.0146	12.5463	43.4828	3.46578	1.79318	0.0154967	0.492808	5	26612934	26618708	+	1671	Medtr5g064120	GO:0003676;GO:0003676;GO:0003723;GO:0003723;	-	-	11430239	RNA-binding (RRM/RBD/RNP motif) family protein
Medtr2g098910	49.0485	27.7735	70.3235	2.53203	1.3403	0.0158863	0.497098	2	42354799	42357939	+	3141	Medtr2g098910	GO:0000280;GO:0000911;GO:0004672;GO:0004672;GO:0005515;GO:0005524;GO:0005524;GO:0006468;GO:0006468;GO:0007000;GO:0009640;GO:0009786;GO:0009845;GO:0009933;GO:0009986;GO:0010162;GO:0010182;GO:0010228;GO:0010311;GO:0016020;GO:0016021;GO:0016021;GO:0016301;GO:0016310;GO:0016740;GO:0019199;GO:0030139;GO:0032585;GO:0048825;	-	-	11426633	receptor-like kinase
Medtr8g098725	12.7717	5.57782	19.9655	3.57945	1.83974	0.0159325	0.497774	8	41221171	41224283	-	2536	Medtr8g098725	GO:0005515;GO:0005634;GO:0005634;GO:0005515;GO:0005634;GO:0005634;	-	-	25502080	CCT motif protein
Medtr4g094885	126.193	80.2525	172.132	2.14489	1.1009	0.0161403	0.499916	4	39209093	39212942	-	2554	Medtr4g094885	GO:0004672;GO:0004672;GO:0005524;GO:0005524;GO:0006468;GO:0006468;GO:0016020;GO:0016021;GO:0016021;GO:0016301;GO:0016310;GO:0016740;	-	-	25493478	LRR receptor-like kinase
Medtr3g115340	3532.14	2079.21	4985.07	2.39757	1.26158	0.016176	0.499997	3	53932569	53939913	-	3844	Medtr3g115340	GO:0003824;GO:0003824;GO:0003844;GO:0003844;GO:0003844;GO:0004553;GO:0004553;GO:0005975;GO:0005975;GO:0005978;GO:0005978;GO:0016740;GO:0016757;GO:0043169;GO:0043169;GO:0102752;GO:0003824;GO:0003824;GO:0003844;GO:0003844;GO:0004553;GO:0004553;GO:0005975;GO:0005975;GO:0005978;GO:0005978;GO:0043169;GO:0043169;GO:0003824;GO:0003824;GO:0003844;GO:0003844;GO:0003844;GO:0004553;GO:0004553;GO:0005975;GO:…	K00700	[EC:2.4.1.18]	25490305	starch branching enzyme I
Medtr8g089920	140.548	85.5313	195.564	2.28647	1.19312	0.0163346	0.503061	8	37547835	37548284	+	450	Medtr8g089920	-	-	-	25501866	Avr9/Cf-9 rapidly elicited protein, putative
Medtr7g065130	33.1009	20.361	45.8409	2.25141	1.17083	0.0164748	0.505538	7	23733151	23734236	+	991	Medtr7g065130	-	-	-	11411956	hypothetical protein
Medtr8g054430	6.75724	0.635338	12.8791	20.2713	4.34137	0.0168097	0.513951	8	19780464	19781952	-	1284	Medtr8g054430	GO:0005515;	K14829	-	25501192	transducin/WD-like repeat-protein
Medtr5g091650	26.8142	15.8532	37.7752	2.38281	1.25266	0.0168527	0.514646	5	39966518	39969667	+	817	Medtr5g091650	-	-	-	11423358	glucan endo-1,3-beta-glucosidase-like protein
Medtr4g106500	45.2484	25.9211	64.5757	2.49124	1.31686	0.0173346	0.522447	4	44175642	44176428	+	787	Medtr4g106500	-	-	-	11407967	UVI1, putative
Medtr4g119490	6.16529	1.61954	10.711	6.61364	2.72544	0.0173754	0.523056	4	49529016	49533061	-	3088	Medtr4g119490	GO:0006511;GO:0006511;GO:0031625;GO:0031625;	K03347	-	11413169	cullin-like protein
Medtr1g022370	17.6178	9.16447	26.0711	2.8448	1.50833	0.0177527	0.526311	1	7088261	7091159	-	2392	Medtr1g022370	GO:0005515;	-	-	25482157	tubby-F-box-like protein
Medtr7g110140	26.0239	15.2639	36.7839	2.40987	1.26895	0.0178463	0.526954	7	45144697	45145494	+	798	Medtr7g110140	-	-	-	11430026	short-chain dehydrogenase/reductase
Medtr7g103390	21.7654	6.51314	37.0176	5.68352	2.50678	0.017894	0.526954	7	41824255	41826144	+	1890	Medtr7g103390	GO:0003677;GO:0003677;	-	-	25499370	Myb/SANT-like DNA-binding domain protein
Medtr6g082180	12.2395	5.44635	19.0327	3.49458	1.80512	0.0181441	0.530099	6	30681976	30683550	+	911	Medtr6g082180	GO:0005515;GO:0005515;	-	-	11435531	hypothetical protein
Medtr2g084875	336.229	219.126	453.332	2.06882	1.04881	0.0195354	0.558277	2	36016593	36018211	-	1619	Medtr2g084875	GO:0004106;GO:0004106;GO:0004664;GO:0004664;GO:0008652;GO:0009073;GO:0009094;GO:0009094;GO:0009094;GO:0009507;GO:0009536;GO:0009570;GO:0009570;GO:0016829;GO:0047769;GO:0047769;	K05359	-	25487515	arogenate/prephenate dehydratase
Medtr0017s0100	7.60535	2.52366	12.687	5.02723	2.32976	0.0201118	0.570893	scaffold0017	33208	36714	+	1515	Medtr0017s0100	GO:0008168;GO:0008168;GO:0008168;GO:0008171;GO:0008171;GO:0016740;GO:0032259;GO:0046983;GO:0046983;	-	-	25479643	caffeic acid O-methyltransferase
Medtr5g009970	23.1991	13.0132	33.3851	2.56549	1.35923	0.0204404	0.578279	5	2561843	2565277	+	2498	Medtr5g009970	GO:0000272;GO:0003824;GO:0003824;GO:0004553;GO:0004553;GO:0004553;GO:0005975;GO:0005975;GO:0005975;GO:0008152;GO:0008810;GO:0008810;GO:0008810;GO:0016787;GO:0016798;GO:0030245;GO:0030245;GO:0000272;GO:0003824;GO:0003824;GO:0004553;GO:0004553;GO:0004553;GO:0005975;GO:0005975;GO:0005975;GO:0008152;GO:0008810;GO:0008810;GO:0016787;GO:0016798;GO:0030245;GO:0030245;GO:0000272;GO:0003824;GO:0003824;GO:…	-	-	11440011	endo-1,4-beta-glucanase
Medtr2g103300	2.5732	0	5.14641	Inf	Inf	0.0204995	0.578682	2	44459443	44461907	-	1413	Medtr2g103300	GO:0006520;GO:0006520;GO:0006807;GO:0006807;GO:0009507;GO:0009507;GO:0016853;GO:0016855;GO:0016855;GO:0036361;GO:0036361;GO:0047689;	-	-	11427200	aspartate racemase
Medtr7g094270	27.7873	11.0187	44.556	4.04367	2.01566	0.0207113	0.583343	7	37519773	37520532	-	760	Medtr7g094270	-	-	-	25499071	hypothetical protein
Medtr4g076470	4.58923	0.599962	8.5785	14.2984	3.83778	0.0208286	0.584384	4	29237788	29241475	+	1244	Medtr4g076470	GO:0004553;GO:0004553;GO:0005975;GO:0005975;GO:0008152;GO:0016787;GO:0016798;GO:0042973;	-	-	11440651	glucan endo-1,3-beta-glucosidase
Medtr4g059870	67.4649	33.6082	101.322	3.01478	1.59205	0.0213358	0.593684	4	22083892	22086566	-	2003	Medtr4g059870	GO:0003676;GO:0003676;GO:0003700;GO:0003700;GO:0006355;	-	-	11408002	C2H2 and C2HC zinc finger protein, putative
Medtr2g093230	11.3703	4.93702	17.8035	3.60613	1.85045	0.0217512	0.602599	2	39746290	39749658	-	2151	Medtr2g093230	GO:0016020;GO:0016021;GO:0016021;	-	-	11422135	gamete-like protein
Medtr8g023130	14.1919	7.01154	21.3724	3.04817	1.60794	0.0225847	0.617313	8	8275146	8279407	+	1871	Medtr8g023130	-	-	-	11445924	carboxy-terminal region remorin
Medtr8g042910	31.035	10.677	51.3929	4.81343	2.26707	0.0228963	0.620075	8	16607577	16610530	-	2120	Medtr8g042910	GO:0004857;GO:0004857;GO:0005618;GO:0016787;GO:0030599;GO:0030599;GO:0030599;GO:0042545;GO:0042545;GO:0042545;GO:0043086;GO:0045330;GO:0045330;GO:0045490;GO:0045490;	K01051	[EC:3.1.1.11]	25501131	pectinesterase/pectinesterase inhibitor
Medtr6g088810	39.8088	18.0585	61.5592	3.40888	1.7693	0.0229194	0.620075	6	33962382	33967034	-	1140	Medtr6g088810	GO:0005618;GO:0016787;GO:0030599;GO:0030599;GO:0030599;GO:0042545;GO:0042545;GO:0042545;GO:0045330;GO:0045330;GO:0045490;GO:0045490;	K01051	[EC:3.1.1.11]	25496985	pectinesterase
Medtr2g025120	4096.12	2531.18	5661.06	2.23653	1.16126	0.0229482	0.620075	2	8925945	8928216	+	1932	Medtr2g025120	GO:0009815;GO:0016491;GO:0016491;GO:0016491;GO:0046872;GO:0046872;GO:0055114;GO:0055114;GO:0055114;GO:0016491;GO:0016491;GO:0016491;GO:0046872;GO:0046872;GO:0055114;GO:0055114;GO:0055114;	K05933	[EC:1.14.17.4]	11445019	1-aminocyclopropane-1-carboxylate oxidase
Medtr7g115650	23.4836	10.712	36.2552	3.38455	1.75896	0.022974	0.620075	7	47812651	47813895	+	783	Medtr7g115650	GO:0003677;GO:0003677;GO:0003677;GO:0005634;	K09422	-	25499713	myb transcription factor
Medtr2g011730	37.7312	23.1133	52.349	2.26488	1.17944	0.0230339	0.620382	2	2921774	2927153	-	2234	Medtr2g011730	GO:0005509;GO:0005509;GO:0016491;GO:0016491;GO:0016491;GO:0055114;GO:0055114;GO:0055114;	K17871	[EC:1.6.5.9]	25485923	NAD(P)H dehydrogenase B2
Medtr5g093900	17.6978	9.54614	25.8494	2.70784	1.43714	0.0230831	0.620382	5	40998796	41003718	-	1579	Medtr5g093900	GO:0008168;GO:0008168;GO:0008168;GO:0016740;GO:0032259;GO:0103007;	K18848	[EC:2.1.1.278]	11435469	indole-3-acetate O-methyltransferase-like protein
Medtr4g122580	13.7595	6.73472	20.7843	3.08615	1.62581	0.0231915	0.620382	4	50552361	50559328	-	2400	Medtr4g122580	GO:0000049;GO:0000049;GO:0000049;GO:0000166;GO:0000166;GO:0000166;GO:0003723;GO:0004812;GO:0004812;GO:0004812;GO:0004825;GO:0004825;GO:0005524;GO:0005524;GO:0005524;GO:0005737;GO:0006412;GO:0006418;GO:0006418;GO:0006431;GO:0006431;GO:0016874;	K01874	[EC:6.1.1.10]	11422324	methionine-tRNA ligase, putative
Medtr7g069540	68.9074	45.7915	92.0233	2.00962	1.00692	0.0232487	0.620382	7	25622729	25626333	+	2162	Medtr7g069540	GO:0000287;GO:0000287;GO:0003824;GO:0003824;GO:0016831;GO:0016831;GO:0030976;GO:0030976;GO:0046872;	K01568	[EC:4.1.1.1]	11415692	pyruvate decarboxylase
Medtr8g015560	5.30491	1.26521	9.34462	7.38584	2.88476	0.0233916	0.622885	8	5093188	5094109	-	922	Medtr8g015560	-	-	-	25500390	hypothetical protein
Medtr4g029430	13.6354	6.51989	20.751	3.18272	1.67026	0.0235251	0.625126	4	10170282	10171673	+	966	Medtr4g029430	-	-	-	11424511	tubby C 2 protein
Medtr8g445800	31.0874	15.4918	46.6829	3.0134	1.59139	0.0243357	0.636668	8	17480936	17498034	-	5831	Medtr8g445800	GO:0004672;GO:0004672;GO:0005515;GO:0005524;GO:0005524;GO:0006468;GO:0006468;GO:0016020;GO:0016021;GO:0016021;GO:0016301;GO:0016310;GO:0004672;GO:0004672;GO:0005515;GO:0005524;GO:0005524;GO:0006468;GO:0006468;GO:0016020;GO:0016021;GO:0016021;GO:0016301;GO:0016310;GO:0004672;GO:0004672;GO:0005515;GO:0005524;GO:0005524;GO:0006468;GO:0006468;GO:0016020;GO:0016021;GO:0016021;GO:0016301;GO:0016310;	-	-	25502389	LRR receptor-like kinase, putative
Medtr4g013260	78.5449	47.897	109.193	2.27974	1.18887	0.0252448	0.644398	4	3667656	3670777	+	1773	Medtr4g013260	GO:0003677;GO:0003700;GO:0003700;GO:0005634;GO:0005634;GO:0006355;GO:0006355;GO:0043565;GO:0043565;	K13424	-	25491419	WRKY transcription factor
Medtr7g104250	50.5721	30.4735	70.6708	2.31909	1.21356	0.0252632	0.644398	7	42240124	42240414	-	291	Medtr7g104250	-	-	-	11421496	peptidoglycan-binding LysM domain protein
Medtr2g020710	540.969	317.966	763.972	2.40268	1.26465	0.0252959	0.644513	2	6922051	6928971	+	4947	Medtr2g020710	GO:0016020;GO:0016020;GO:0016020;GO:0016021;GO:0016021;GO:0016021;GO:0022857;GO:0022857;GO:0055085;GO:0055085;GO:0008643;GO:0016020;GO:0016020;GO:0016020;GO:0016021;GO:0016021;GO:0016021;GO:0022857;GO:0022857;GO:0055085;GO:0055085;GO:0016020;GO:0016020;GO:0016020;GO:0016021;GO:0016021;GO:0016021;GO:0022857;GO:0022857;GO:0055085;GO:0055085;GO:0016020;GO:0016020;GO:0016020;GO:0016021;GO:0016021;GO:…	K08145	-	11446875	sugar porter (SP) family MFS transporter
Medtr5g037343	27.9872	17.5338	38.4406	2.19237	1.13249	0.0259565	0.654119	5	16338883	16346189	-	2161	Medtr5g037343	-	K22748	[EC:2.1.1.43]	25494617	hypothetical protein
Medtr7g088500	38.1654	25.0076	51.3232	2.0523	1.03724	0.026233	0.656524	7	34479004	34482328	+	1437	Medtr7g088500	GO:0016020;GO:0016021;GO:0016021;GO:0016874;GO:0016874;	-	-	11422685	E3 ubiquitin protein ligase RIE1-like protein
Medtr6g043180	2.44433	0	4.88866	Inf	Inf	0.0262827	0.657119	6	14913981	14920303	+	2712	Medtr6g043180	GO:0003676;GO:0003676;GO:0003743;GO:0003743;GO:0005515;GO:0006413;GO:0031047;GO:0031047;	K11593	-	25496286	eukaryotic translation initiation factor 2c, putative
Medtr5g037930	233.87	129.632	338.108	2.60821	1.38306	0.0264788	0.660096	5	16571711	16572701	-	698	Medtr5g037930	GO:0005623;GO:0005623;GO:0006662;GO:0006662;GO:0015035;GO:0015035;GO:0016491;GO:0045454;GO:0045454;GO:0055114;	K03671	-	11414963	thioredoxin
Medtr4g092960	2.40279	0	4.80559	Inf	Inf	0.0271089	0.669855	4	36899939	36903470	+	2157	Medtr4g092960	GO:0016020;GO:0016021;GO:0016021;GO:0055085;GO:0055085;	-	-	11406813	oligopeptide transporter OPT family protein
Medtr1g087920	199.867	109.37	290.364	2.65487	1.40864	0.0271518	0.669864	1	39359724	39361274	+	1416	Medtr1g087920	GO:0003677;GO:0003677;GO:0003677;GO:0003700;GO:0003700;GO:0005634;GO:0005634;GO:0006351;GO:0006355;GO:0006355;GO:0034059;	K09286	-	11420016	ethylene response factor
Medtr2g016530	55.1576	30.8335	79.4817	2.57777	1.36612	0.0273699	0.669864	2	5079445	5084252	-	3686	Medtr2g016530	GO:0000166;GO:0004672;GO:0004672;GO:0004674;GO:0004674;GO:0005515;GO:0005524;GO:0005524;GO:0005524;GO:0006468;GO:0006468;GO:0016020;GO:0016021;GO:0016021;GO:0016301;GO:0016310;GO:0016740;	K13420	[EC:2.7.11.1]	25485993	LRR receptor-like kinase
Medtr5g037700	21.0872	11.684	30.4905	2.60961	1.38383	0.0278365	0.67723	5	16493385	16495070	-	1171	Medtr5g037700	GO:0005515;GO:0007165;GO:0007165;	-	-	11427712	disease resistance protein (TIR-NBS-LRR class)
Medtr6g018490	24.4805	14.6976	34.2635	2.33123	1.22109	0.0284101	0.683696	6	7084584	7088542	+	1501	Medtr6g018490	GO:0003846;GO:0016740;GO:0016746;	K01054	[EC:3.1.1.23]	11422536	monoglyceride lipase
Medtr8g099930	42.5118	26.5327	58.4909	2.20448	1.14044	0.0284211	0.683696	8	40279266	40282472	-	1398	Medtr8g099930	GO:0004180;GO:0004185;GO:0004185;GO:0004185;GO:0006508;GO:0006508;GO:0006508;GO:0008233;GO:0016787;	K16297	[EC:3.4.16.-]	11436964	serine carboxypeptidase-like protein
Medtr8g010590	42.0385	21.3231	62.7538	2.943	1.55729	0.0284482	0.683696	8	2787028	2789699	+	2163	Medtr8g010590	GO:0003824;GO:0003824;GO:0004629;GO:0016787;GO:0016788;GO:0016788;GO:0034480;GO:0003824;GO:0003824;GO:0016788;GO:0016788;	K01114	[EC:3.1.4.3]	25500244	non-specific phospholipase C4
Medtr2g436530	175.603	91.8788	259.327	2.82248	1.49697	0.0288449	0.687322	2	14206242	14213566	-	3859	Medtr2g436530	GO:0005515;GO:0007165;GO:0007165;GO:0016874;GO:0016874;	-	-	25488113	E3 ubiquitin-protein ligase LIN-like protein, putative
Medtr7g024500	10.1802	4.36568	15.9946	3.66373	1.87331	0.0290665	0.690656	7	8064048	8066975	-	1185	Medtr7g024500	GO:0008168;GO:0008168;GO:0008168;GO:0008171;GO:0008171;GO:0016740;GO:0032259;GO:0033800;GO:0046983;GO:0046983;	-	-	11446101	isoflavone-7-O-methyltransferase
Medtr7g102820	36.6352	24.2614	49.0091	2.02004	1.01438	0.029341	0.695225	7	41603032	41607157	-	2313	Medtr7g102820	GO:0016491;GO:0016491;GO:0016491;GO:0045486;GO:0046872;GO:0046872;GO:0051213;GO:0051213;GO:0055114;GO:0055114;GO:0055114;	-	-	11427170	leucoanthocyanidin dioxygenase-like protein
Medtr4g051575	13.3576	6.61637	20.0988	3.03773	1.603	0.0294349	0.695474	4	18530251	18533731	+	1685	Medtr4g051575	GO:0015743;GO:0015743;GO:0016020;GO:0016021;GO:0016021;GO:0015743;GO:0015743;GO:0016020;GO:0016021;GO:0016021;	-	-	25492208	aluminum activated malate transporter family protein
Medtr6g033660	881.031	562.982	1199.08	2.12987	1.09077	0.0300477	0.700845	6	11001486	11003397	+	1912	Medtr6g033660	GO:0016740;GO:0016757;GO:0016758;GO:0016758;	-	-	25495958	UDP-glucosyl transferase 88A1
Medtr7g039550	5.61479	1.625	9.60457	5.91049	2.56328	0.0303271	0.703977	7	14709561	14711094	-	996	Medtr7g039550	GO:0016740;GO:0016758;GO:0016758;	-	-	25498100	UDP-glucosyltransferase family protein
Medtr3g436860	22.8359	13.8048	31.867	2.3084	1.2069	0.0306401	0.7088	3	12403405	12408412	+	3525	Medtr3g436860	GO:0005515;GO:0005515;	-	-	25490461	F-box plant-like protein
Medtr1g029600	50.6716	30.398	70.9452	2.33387	1.22273	0.0306767	0.709	1	10187403	10188286	+	884	Medtr1g029600	GO:0016301;GO:0016301;GO:0016310;	-	-	25482440	receptor-like kinase plant, putative
Medtr7g099870	6.1501	1.93045	10.3697	5.37166	2.42537	0.0311578	0.714266	7	40108410	40112550	-	1332	Medtr7g099870	GO:0016020;GO:0016021;GO:0016021;	-	-	11424571	ion channel regulatory protein UNC-93
Medtr6g093180	475.137	249.04	701.235	2.81575	1.49352	0.0315052	0.714348	6	35180903	35189212	-	2561	Medtr6g093180	GO:0016853;GO:0016866;GO:0016866;	K20659	[EC:5.4.99.41]	25497034	beta-amyrin synthase
Medtr3g083960	14.9445	7.83141	22.0576	2.81656	1.49393	0.0315598	0.714348	3	37889732	37892858	-	1877	Medtr3g083960	GO:0005768;GO:0005769;GO:0005769;GO:0005886;GO:0005886;GO:0006811;GO:0015095;GO:0015095;GO:0015095;GO:0015693;GO:0015693;GO:0015693;GO:0016020;GO:0016021;GO:0016021;GO:0016021;GO:1903830;	K22733	-	11443042	magnesium transporter NIPA2-like protein
Medtr4g114660	7.96785	2.81818	13.1175	4.65462	2.21866	0.0316793	0.714601	4	47180359	47180843	+	345	Medtr4g114660	GO:0010374;GO:0010374;	-	-	11446647	epidermal patterning factor-like protein
Medtr4g075730	10.8663	4.84729	16.8852	3.48344	1.80051	0.0318326	0.716801	4	28960090	28965957	+	1454	Medtr4g075730	GO:0016020;GO:0016021;GO:0016021;GO:0016020;GO:0016021;GO:0016021;	-	-	25492862	late embryogenesis abundant protein
Medtr8g037880	8.07833	3.16704	12.9896	4.1015	2.03615	0.0321082	0.72235	8	14033973	14038400	+	1516	Medtr8g037880	GO:0004497;GO:0004499;GO:0004499;GO:0016491;GO:0050660;GO:0050660;GO:0050661;GO:0050661;GO:0055114;GO:0055114;GO:0055114;	-	-	11444078	flavin containing monooxygenase FMO GS-OX-like protein
Medtr3g465510	3.79457	0.647558	6.94159	10.7196	3.42218	0.0333633	0.743336	3	26507442	26512610	-	1405	Medtr3g465510	GO:0016020;GO:0016021;GO:0016021;	K15015	-	25490978	transmembrane amino acid transporter family protein
Medtr8g045555	9.11262	3.20917	15.0161	4.67912	2.22624	0.0340131	0.753185	8	17812773	17814331	-	987	Medtr8g045555	GO:0006952;GO:0006952;	-	-	25501143	pathogenesis-related protein bet V I family protein
Medtr1g103680	4.97718	1.28965	8.66472	6.71867	2.74818	0.0340578	0.753518	1	46933000	46934958	+	1828	Medtr1g103680	GO:0004497;GO:0004497;GO:0005506;GO:0005506;GO:0016491;GO:0016705;GO:0016705;GO:0020037;GO:0020037;GO:0046872;GO:0055114;GO:0055114;GO:0055114;	-	-	25485204	cytochrome P450 family protein
Medtr1g069960	32.6207	20.0079	45.2335	2.26078	1.17682	0.0342404	0.755272	1	30641535	30642361	+	827	Medtr1g069960	GO:0003677;GO:0003677;GO:0003677;GO:0003700;GO:0003700;GO:0005634;GO:0005634;GO:0006351;GO:0006355;GO:0006355;	-	-	25484272	ethylene response factor
Medtr3g450800	23.7347	14.6436	32.8258	2.24164	1.16456	0.0347697	0.759339	3	17577613	17589373	-	2219	Medtr3g450800	GO:0016020;GO:0016020;GO:0016020;GO:0016021;GO:0016021;GO:0016740;GO:0016757;GO:0016760;GO:0016760;GO:0030244;GO:0030244;GO:0071555;GO:0071555;	-	-	25490592	cellulose synthase-like protein
Medtr2g026420	135.477	80.3968	190.558	2.37021	1.24502	0.0352623	0.766075	2	9549953	9550687	+	735	Medtr2g026420	-	-	-	11410738	hypothetical protein
Medtr6g033600	2.2515	0	4.503	Inf	Inf	0.0353581	0.766253	6	10948587	10954283	+	966	Medtr6g033600	GO:0003824;GO:0003824;GO:0004400;GO:0008483;GO:0008483;GO:0009058;GO:0009058;GO:0016740;GO:0030170;GO:0030170;	K00817	[EC:2.6.1.9]	25495953	class I/II aminotransferase
Medtr7g060770	2.2493	0	4.4986	Inf	Inf	0.0354162	0.766856	7	21968314	21971174	-	1939	Medtr7g060770	GO:0003824;GO:0003824;GO:0004722;GO:0004722;GO:0006470;GO:0006470;GO:0016787;	K01102	[EC:3.1.3.43]	11408575	protein phosphatase 2C family protein
Medtr3g083820	10.7514	4.9412	16.5616	3.35173	1.74491	0.035819	0.771374	3	37814534	37820093	-	2211	Medtr3g083820	GO:0003993;GO:0003993;GO:0003993;GO:0016311;GO:0016787;GO:0016787;GO:0016787;GO:0046872;GO:0046872;	K22390	-	11427559	purple acid phosphatase superfamily protein
Medtr3g102570	3.56561	0	7.13121	Inf	Inf	0.0359078	0.771381	3	47268844	47271241	-	1093	Medtr3g102570	GO:0000977;GO:0000977;GO:0003677;GO:0003677;GO:0003677;GO:0005634;GO:0005634;GO:0006351;GO:0045944;GO:0045944;GO:0046983;GO:0046983;	K09260	-	25489922	MADS-box transcription factor family protein
Medtr5g430440	5.47596	1.57741	9.37451	5.94298	2.57119	0.0359291	0.771381	5	12802979	12804341	-	598	Medtr5g430440	-	-	-	25494999	hypothetical protein
Medtr1g069940	8.47893	3.41942	13.5384	3.95927	1.98524	0.0359928	0.772096	1	30623384	30624421	-	1038	Medtr1g069940	GO:0003677;GO:0003677;GO:0003677;GO:0003700;GO:0003700;GO:0005634;GO:0005634;GO:0006351;GO:0006355;GO:0006355;	K14516	-	25484268	ethylene-responsive transcription factor 1B
Medtr3g479470	55.3264	31.9428	78.71	2.46409	1.30106	0.0360795	0.773303	3	35735161	35738230	-	1702	Medtr3g479470	GO:0016740;GO:0016757;GO:0016758;GO:0016758;	-	-	25491117	UDP-glucosyltransferase family protein
Medtr2g008210	5.43336	1.5951	9.27162	5.81257	2.53918	0.0363845	0.777867	2	1349464	1351453	+	1446	Medtr2g008210	GO:0016740;GO:0016757;GO:0016758;GO:0016758;	-	-	11429235	UDP-glucosyltransferase family protein
Medtr5g091100	7.94991	3.13584	12.764	4.07034	2.02515	0.0368819	0.782773	5	39693947	39694471	+	525	Medtr5g091100	-	-	-	11428813	hypothetical protein
Medtr1g090957	10.6709	2.54135	18.8005	7.39784	2.8871	0.0371707	0.786516	1	41065567	41066415	+	812	Medtr1g090957	GO:0030246;GO:0030246;GO:0030246;	-	-	25484872	legume lectin beta domain protein
Medtr4g113820	160.667	87.5173	233.817	2.67167	1.41774	0.0373538	0.788073	4	46845878	46846953	+	720	Medtr4g113820	GO:0016020;GO:0016021;GO:0016021;	-	-	11440639	early nodulin 93
Medtr2g098790	16.3289	7.17163	25.4862	3.55376	1.82935	0.0379315	0.795558	2	42287282	42292670	+	1548	Medtr2g098790	GO:0004553;GO:0004553;GO:0005975;GO:0005975;GO:0016787;	K01188	[EC:3.2.1.21]	11431874	glycoside hydrolase family 1 protein
Medtr1g068970	16.7049	2.84133	30.5685	10.7585	3.42741	0.0379555	0.795558	1	29516805	29520210	-	1834	Medtr1g068970	GO:0016491;GO:0055114;GO:0102339;GO:0102340;GO:0102341;GO:0102342;	-	-	25484127	short-chain dehydrogenase TIC 32
Medtr8g032240	30.5389	20.2273	40.8505	2.01957	1.01405	0.0386361	0.801037	8	12121461	12124545	-	3085	Medtr8g032240	GO:0000166;GO:0000823;GO:0000823;GO:0005524;GO:0005524;GO:0016301;GO:0016301;GO:0016301;GO:0016310;GO:0016740;GO:0032958;GO:0032958;GO:0047326;GO:0047326;GO:0102732;GO:0102732;	K00915	-	11446924	inositol polyphosphate multikinase beta-like protein
Medtr4g133440	12.8255	6.17232	19.4787	3.15581	1.65801	0.0394219	0.807964	4	55823392	55824517	+	540	Medtr4g133440	-	-	-	11427127	SEC14 cytosolic factor-like protein
Medtr2g090900	25.3772	16.0854	34.6689	2.15531	1.10789	0.0399741	0.813913	2	39027589	39030827	+	1041	Medtr2g090900	GO:0003700;GO:0003700;GO:0006355;GO:0006355;GO:0003700;GO:0003700;GO:0006355;GO:0006355;	-	-	25487735	bZIP family transcription factor
Medtr6g088465	4.16154	0.317669	8.00542	25.2005	4.65538	0.0403095	0.815088	6	33641608	33645391	+	3394	Medtr6g088465	GO:0003677;GO:0005515;GO:0007165;GO:0007165;GO:0043531;GO:0043531;	-	-	25496946	disease resistance protein (TIR-NBS-LRR class)
Medtr3g100500	4137.3	2665.87	5608.74	2.1039	1.07307	0.0406036	0.816273	3	46229075	46230886	+	1812	Medtr3g100500	GO:0004190;GO:0004190;GO:0004190;GO:0006508;GO:0006508;GO:0006508;GO:0008233;GO:0009505;GO:0016787;GO:0043067;GO:0043067;	-	-	11434231	aspartic proteinase nepenthesin-like protein
Medtr7g058640	44.1725	25.7117	62.6332	2.43598	1.2845	0.0406255	0.816273	7	21214758	21216356	+	1407	Medtr7g058640	GO:0016020;GO:0016021;GO:0016021;GO:0016021;GO:0016192;GO:0016192;GO:0016020;GO:0016021;GO:0016021;GO:0016192;GO:0016192;GO:0016020;GO:0016021;GO:0016021;GO:0016021;GO:0016192;GO:0016192;	K08511	-	11430277	synaptobrevin-like protein
Medtr5g073200	44.1536	25.8184	62.4887	2.42031	1.27519	0.0410469	0.817309	5	31158032	31162070	+	1650	Medtr5g073200	GO:0000287;GO:0000287;GO:0010333;GO:0010333;GO:0016829;GO:0016829;GO:0016829;GO:0046872;	-	-	11411115	sesquiterpene synthase
Medtr3g466980	2.27502	0	4.55005	Inf	Inf	0.0412213	0.817309	3	27598411	27599757	-	666	Medtr3g466980	GO:0000981;GO:0000981;GO:0000982;GO:0000987;GO:0000987;GO:0003677;GO:0003677;GO:0003677;GO:0005634;GO:0005634;GO:0006351;GO:0045944;GO:0045944;GO:0046983;GO:0046983;	-	-	25491067	MADS-box transcription factor family protein
Medtr2g010580	4.74865	1.2829	8.21439	6.40301	2.67875	0.0418922	0.823469	2	2451482	2451976	+	495	Medtr2g010580	GO:0005576;GO:0005576;	K13449	-	11424228	CAP, cysteine-rich secretory protein, antigen 5
Medtr7g096320	11.4708	5.62542	17.3162	3.07821	1.62209	0.0420394	0.824446	7	38641645	38643422	+	1778	Medtr7g096320	GO:0005506;GO:0005506;GO:0016705;GO:0016705;GO:0020037;GO:0020037;GO:0055114;GO:0055114;	-	-	25499211	cytochrome P450 family 94 protein
Medtr6g043460	2.929	0.299981	5.55802	18.5279	4.21163	0.0425416	0.830306	6	15049777	15052185	-	1491	Medtr6g043460	GO:0004601;GO:0004601;GO:0004601;GO:0005576;GO:0005576;GO:0006979;GO:0006979;GO:0006979;GO:0016491;GO:0020037;GO:0020037;GO:0020037;GO:0042744;GO:0042744;GO:0042744;GO:0046872;GO:0046872;GO:0055114;GO:0055114;GO:0055114;GO:0098869;	K00430	[EC:1.11.1.7]	25496303	peroxidase family protein
Medtr1g041875	2.9279	0.299981	5.55582	18.5206	4.21106	0.0425672	0.830306	1	15753018	15756132	+	1752	Medtr1g041875	GO:0016020;GO:0016020;GO:0016020;GO:0016021;GO:0016021;GO:0022857;GO:0022857;GO:0055085;GO:0055085;	-	-	25482999	peptide transporter
Medtr0078s0200	7.34867	2.92687	11.7705	4.02151	2.00774	0.0428925	0.835367	scaffold0184	10821	12792	-	1972	Medtr0078s0200	GO:0016740;GO:0016757;GO:0016758;GO:0016758;	K08237	[EC:2.4.1.218]	25480578	UDP-glucosyltransferase family protein
Medtr5g077370	6.81489	2.53042	11.0994	4.38638	2.13303	0.0437333	0.842688	5	33031895	33034672	-	2778	Medtr5g077370	GO:0003676;GO:0003676;	-	-	11425958	zinc finger-like protein
Medtr5g089170	19.5083	11.8364	27.1803	2.29633	1.19933	0.0439716	0.843507	5	38751004	38752543	-	1226	Medtr5g089170	GO:0003677;GO:0003700;GO:0003700;GO:0005634;GO:0005634;GO:0005634;GO:0006355;GO:0006355;GO:0043565;GO:0043565;	K09419	-	11432338	heat shock transcription factor
Medtr4g093110	10.9311	5.29006	16.5721	3.13269	1.6474	0.0439905	0.843507	4	36948097	36950385	+	2289	Medtr4g093110	GO:0004672;GO:0004672;GO:0005524;GO:0005524;GO:0006468;GO:0006468;GO:0016020;GO:0016021;GO:0016021;GO:0016301;GO:0016310;GO:0030246;GO:0030246;GO:0030246;	-	-	11407225	lectin receptor kinase
Medtr3g112460	6.28905	2.24265	10.3354	4.60858	2.20432	0.0442164	0.843507	3	52711485	52714657	+	1805	Medtr3g112460	GO:0005215;GO:0005215;GO:0006857;GO:0006857;GO:0016020;GO:0016020;GO:0016020;GO:0016021;GO:0016021;GO:0022857;GO:0022857;GO:0055085;GO:0055085;	K14638	-	25490242	peptide transporter
Medtr5g032060	6.7563	2.52495	10.9877	4.35164	2.12156	0.0442872	0.843507	5	13747041	13751458	-	3783	Medtr5g032060	GO:0003779;GO:0003779;GO:0016301;GO:0016301;GO:0016310;	-	-	11408596	kinase interacting (KIP1-like) family protein
Medtr8g046240	12.3291	5.21256	19.4456	3.73053	1.89938	0.0449263	0.847024	8	18101780	18104684	+	2237	Medtr8g046240	GO:0004497;GO:0004497;GO:0005506;GO:0005506;GO:0016020;GO:0016021;GO:0016021;GO:0016491;GO:0016705;GO:0016705;GO:0020037;GO:0020037;GO:0046872;GO:0055114;GO:0055114;GO:0055114;	-	-	11405267	cytochrome P450 family protein
Medtr2g035150	200.441	128.663	272.218	2.11575	1.08117	0.045892	0.853814	2	13514536	13515612	+	912	Medtr2g035150	GO:0006952;GO:0006952;GO:0006952;GO:0009607;GO:0009607;	-	-	11408808	disease-resistance response protein
Medtr7g095500	12.9765	4.82195	21.131	4.38225	2.13167	0.0464105	0.859679	7	38267693	38270795	+	1767	Medtr7g095500	-	-	-	25499158	auxin canalization protein
Medtr1g023230	12.807	5.34859	20.2654	3.78893	1.92179	0.0469358	0.863983	1	7417436	7419015	-	1098	Medtr1g023230	GO:0003700;GO:0005634;GO:0006355;GO:0009555;GO:0009640;GO:0043565;GO:0048653;	-	-	11419224	zinc finger, LRP1 type protein
Medtr4g101270	2.07228	0	4.14456	Inf	Inf	0.0471112	0.86451	4	41825063	41825632	+	570	Medtr4g101270	GO:0006508;GO:0008233;GO:0008233;	-	-	11426342	protease inhibitor/seed storage/LTP family protein
Medtr8g074870	2.06811	0	4.13623	Inf	Inf	0.0472578	0.865268	8	31642533	31647024	+	684	Medtr8g074870	GO:0005506;GO:0005506;GO:0016491;GO:0016491;GO:0016705;GO:0016705;GO:0031418;GO:0031418;GO:0046872;GO:0055114;GO:0055114;	K00472	[EC:1.14.11.2]	11442741	prolyl 4-hydroxylase alpha subunit, putative
Medtr4g134460	21.4122	10.9849	31.8394	2.89846	1.53528	0.047527	0.867692	4	56311697	56314294	+	1578	Medtr4g134460	GO:0003677;GO:0003677;GO:0003677;GO:0005634;GO:0005634;GO:0006355;GO:0006355;	-	-	25494356	NAC transcription factor-like protein
Medtr4g063500	2.04129	0	4.08257	Inf	Inf	0.0482184	0.875968	4	23518658	23522754	+	751	Medtr4g063500	GO:0051213;GO:0055114;	-	-	11415944	dessication-induced 1VOC superfamily protein
Medtr8g080180	16.8608	9.82843	23.8932	2.43103	1.28157	0.0484039	0.878279	8	34442437	34445750	+	1770	Medtr8g080180	GO:0005634;	-	-	25501718	carboxy-terminal region remorin
Medtr4g106680	7.34577	2.81818	11.8734	4.21314	2.07489	0.0484275	0.878279	4	44026190	44027481	-	1292	Medtr4g106680	GO:0016020;GO:0016021;GO:0016021;	-	-	11412056	RING-H2 finger protein ATL47
Medtr7g106000	33.0628	20.642	45.4837	2.20346	1.13977	0.0492429	0.885639	7	43048978	43049967	-	990	Medtr7g106000	GO:0016020;GO:0016021;GO:0016021;	-	-	25499467	harpin-induced-like protein
